# Supplementary material for: Perceptions of medical students towards online teaching during the COVID-19 pandemic: a national cross-sectional survey of 2721 UK medical students
Source: PubMed Central journal article supplement — BMJ Open. 2020 Nov 5;10(11):e042378. doi: 10.1136/bmjopen-2020-042378 (PMC7646323; doi:10.1136/bmjopen-2020-042378), 2020-11-05
Supplement: bmjopen-2020-042378.draft_revisions.pdf [file bmjopen-2020-042378.draft_revisions.pdf]

# BMJ Open

BMJ Open is committed to open peer review. As part of this commitment we make the peer review history of every article we publish publicly available.

When an article is published we post the peer reviewers' comments and the authors' responses online. We also post the versions of the paper that were used during peer review. These are the versions that the peer review comments apply to.

The versions of the paper that follow are the versions that were submitted during the peer review process. They are not the versions of record or the final published versions. They should not be cited or distributed as the published version of this manuscript.

BMJ Open is an open access journal and the full, final, typeset and author-corrected version of record of the manuscript is available on our site with no access controls, subscription charges or pay-per-view fees (<http://bmjopen.bmj.com>).

If you have any questions on BMJ Open's open peer review process please email [info.bmjopen@bmj.com](mailto:info.bmjopen@bmj.com)

# BMJ Open

## Perceptions of medical students towards online learning during the COVID-19 pandemic: a national cross-sectional survey of 2721 UK medical students

|                               |                                                                                                                                                                                                                                                                                                                                                                                                                          |
|-------------------------------|--------------------------------------------------------------------------------------------------------------------------------------------------------------------------------------------------------------------------------------------------------------------------------------------------------------------------------------------------------------------------------------------------------------------------|
| Journal:                      | <i>BMJ Open</i>                                                                                                                                                                                                                                                                                                                                                                                                          |
| Manuscript ID                 | bmjopen-2020-042378                                                                                                                                                                                                                                                                                                                                                                                                      |
| Article Type:                 | Original research                                                                                                                                                                                                                                                                                                                                                                                                        |
| Date Submitted by the Author: | 02-Jul-2020                                                                                                                                                                                                                                                                                                                                                                                                              |
| Complete List of Authors:     | Dost, Samiullah; Guy's and St Thomas' Hospitals NHS Trust<br>Hossain, Aleena; Imperial College of Science Technology and Medicine, Faculty of Medicine<br>Shehab, Mai; King's College London School of Medicine, Guy's Campus<br>Abdelwahed, Aida; Imperial College of Science Technology and Medicine, Faculty of Medicine<br>Al-Nusair, Lana; Imperial College of Science Technology and Medicine, Faculty of Medicine |
| Keywords:                     | MEDICAL EDUCATION & TRAINING, World Wide Web technology < BIOTECHNOLOGY & BIOINFORMATICS, Telemedicine < BIOTECHNOLOGY & BIOINFORMATICS, Information technology < BIOTECHNOLOGY & BIOINFORMATICS, EDUCATION & TRAINING (see Medical Education & Training), PUBLIC HEALTH                                                                                                                                                 |
|                               |                                                                                                                                                                                                                                                                                                                                                                                                                          |

SCHOLARONE™  
Manuscripts

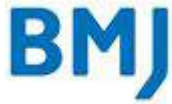

I, the Submitting Author has the right to grant and does grant on behalf of all authors of the Work (as defined in the below author licence), an exclusive licence and/or a non-exclusive licence for contributions from authors who are: i) UK Crown employees; ii) where BMJ has agreed a CC-BY licence shall apply, and/or iii) in accordance with the terms applicable for US Federal Government officers or employees acting as part of their official duties; on a worldwide, perpetual, irrevocable, royalty-free basis to BMJ Publishing Group Ltd ("BMJ") its licensees and where the relevant Journal is co-owned by BMJ to the co-owners of the Journal, to publish the Work in this journal and any other BMJ products and to exploit all rights, as set out in our [licence](#).

The Submitting Author accepts and understands that any supply made under these terms is made by BMJ to the Submitting Author unless you are acting as an employee on behalf of your employer or a postgraduate student of an affiliated institution which is paying any applicable article publishing charge ("APC") for Open Access articles. Where the Submitting Author wishes to make the Work available on an Open Access basis (and intends to pay the relevant APC), the terms of reuse of such Open Access shall be governed by a Creative Commons licence – details of these licences and which [Creative Commons](#) licence will apply to this Work are set out in our licence referred to above.

Other than as permitted in any relevant BMJ Author's Self Archiving Policies, I confirm this Work has not been accepted for publication elsewhere, is not being considered for publication elsewhere and does not duplicate material already published. I confirm all authors consent to publication of this Work and authorise the granting of this licence.

1  
2  
3 **Perceptions of Medical Students Towards Online Learning During the COVID-19 Pandemic: a**  
4 **national cross-sectional survey of 2721 UK medical students**  
5  
6

7 Samiullah Dost<sup>1\*</sup>, Aleena Hossain<sup>2\*†</sup>, Mai Shehab<sup>3</sup>, Aida Abdelwahed<sup>2</sup>, and Lana Al-Nusair<sup>2</sup>  
8  
9

- 10  
11  
12 1. *Guys and St Thomas's Hospital, London, SE11 4TX, Academic Foundation Doctor*  
13  
14 2. *Imperial College London, Sir Alexander Fleming, SW7 2AZ, Medical Student*  
15  
16 3. *King's College London, Guy's Campus, London, SE1 1UL, Medical Student*  
17  
18  
19

20  
21 \*SD and AH contributed equally to this study as joint first authors  
22  
23

24  
25 **†Contact address for corresponding author:**  
26

27 Aleena Hossain  
28

29 Chardley, Fairfield Road, Winchester, SO21 2DB  
30

31 [aleena.hossain16@imperial.ac.uk](mailto:aleena.hossain16@imperial.ac.uk)  
32  
33

34  
35 **Word Count:** 3030  
36  
37

38  
39 **KEYWORDS:** Medical Education & Training; Telemedicine; Information Technology; World Wide Web  
40  
41 Technology; Education & Training; Public Health  
42  
43  
44  
45  
46  
47  
48  
49  
50  
51  
52  
53  
54  
55  
56  
57  
58  
59  
60

## **Abstract**

**Objectives** To investigate perceptions of medical students on the role of online learning in facilitating medical education during the COVID-19 pandemic

**Design** Cross-sectional, online national survey

**Setting** Responses collected online from 4<sup>th</sup> May to 11<sup>th</sup> May 2020 across 40 UK medical schools

**Participants** Medical students across all years from UK-registered medical schools

**Main outcome measures** The uses, experiences, perceived benefits and barriers of online learning during the COVID-19 pandemic.

**Results** 2721 medical students across 39 medical schools responded. Medical schools adapted to the pandemic in different ways. The changes included the development of new distance-learning platforms on which content was released, remote delivery of lectures using platforms and the use of question banks and other online active recall resources. A significant difference was found between time spent on online platforms before and during COVID-19, with 7.35% students before vs. 23.56% students during the pandemic spending >15 hours per week ( $p<0.05$ ). The greatest perceived benefits of online learning platforms included their flexibility. Whereas the commonly perceived barriers to utilising online learning platforms included family distraction (26.76%) and poor internet connection (21.53%).

**Conclusions** Online learning has enabled the continuation of medical education during these unprecedented times. Moving forward from this pandemic, in order to maximise the benefits of both face-to-face and online learning, and to improve the efficacy of medical education in the future, we suggest medical schools resort to teaching formats such as team-based/problem-based learning. This utilises online teaching platforms allowing students to digest information in their own time but also allows students to then constructively discuss this material with peers. It has also been shown to be effective in terms of achieving learning outcomes. Beyond COVID-19, we anticipate further

1  
2  
3 incorporation of online learning methods within traditional medical education. This may accompany  
4  
5 the observed shift in medical practice towards virtual consultations.  
6  
7  
8  
9

## 10 Article Summary

### 15 **Strengths & Limitations**

- 16 • The COVID-19 pandemic has undoubtedly impacted the delivery of medical education  
17 with a sudden shift towards online learning platforms; to date, this is the first study  
18 investigating the perceptions of medical students on these changes.
- 19 • This study is strengthened by its collection of responses from a large national cohort of  
20 medical students from 39 out of 40 UK medical schools.
- 21 • The survey extensively explored the benefits of and barriers to online learning methods  
22 with the potential to provide medical schools nationally with a direction for development  
23 of resources.
- 24 • Survey responses may have been subject to recall bias, and limited by timing of the study  
25 coinciding with the examination season where remote learning platforms may often be  
26 resorted to.  
27  
28

29  
30  
31  
32  
33  
34  
35  
36  
37  
38  
39  
40  
41  
42  
43  
44  
45  
46  
47  
48  
49  
50  
51  
52  
53  
54  
55  
56  
57  
58  
59  
60

review only

## INTRODUCTION

Since the first case of coronavirus disease 2019 (COVID-19) in the United Kingdom (UK)(1), the World Health Organisation (WHO) has declared the COVID-19 outbreak as a global pandemic(2). The nationwide lockdown restrictions to control the spread of disease and “flatten the curve” have impacted all aspects of life(3–5); inevitably, medical education has also been affected, with the halting of lectures, clinical placements, and key examinations(6,7). Such measures have resulted in a sudden shift in teaching methods towards online learning. Online learning has played a key role in medical education over recent years(8–10), demonstrated several benefits in enhancing student learning(11). A recent systematic review suggested that offline and online learning are equivalent in terms of outcomes of examinations(12). Key drawbacks have also been highlighted, including time constraints to implement effective online learning(8).

The unprecedented COVID-19 pandemic has caused a sudden shift towards the exclusive adoption of online learning, forming the primary source of medical education and enabling students to continue to learn remotely(13). Teaching sessions have covered key clinical conditions, case studies and examination questions via live-streamed tutorials through platforms such as Zoom(6), shown to have high levels of engagement(14). With around 19.6% of the UK medical student demographic consisting of international students(15), many of whom have returned home, this allows individuals to access teaching regardless of location(6). Nevertheless, learning relying on the internet needs to be tailored towards different learning styles to enable it to be impactful and effective(13). However, whilst the benefits to pre-clinical years of blended learning has been shown, for example in anatomical teaching(16) and especially in a generation accustomed to using YouTube(17), there is limited understanding of the impact of exclusive online learning and its use in clinical years. Concerns have been raised regarding the quality of resources produced during the pandemic due to time constraints, particularly as these resources aim to compensate for lack of exposure(18). Indeed, a recent national

1  
2  
3 Twitter discussion, involving representatives from the General Medical Council (GMC), NHS England  
4 and WHO, found that a key concern amongst students was that remote learning impacted their ability  
5 to develop clinical competence(19). This also highlighted the potential role of the professional use of  
6 social media in facilitating medical education, as shown in surgical training(20).  
7  
8  
9

10  
11  
12  
13  
14 In the coming months, as lockdown restrictions ease, the need for social distancing will continue and  
15 the possibility of medical students acting as vectors of COVID-19(21,22), as seen in the SARS epidemic  
16 in Hong Kong(23), remains. Moreover, PPE shortages may form potential barriers to patient  
17 interaction(24). Therefore, it is likely that e-learning and telemedicine will continue to form vital  
18 sources of medical education. Many authors have suggested that digital health platforms for both  
19 patients and students will remain an integral part of care even after the COVID-19 pandemic(25). Thus,  
20 having a greater understanding of the perceived advantages and drawbacks will allow medical schools  
21 to improve their delivery of online learning. The COVID-19 pandemic has put us in a unique position  
22 to evaluate the significance of online learning platforms in medical education. Whilst many students  
23 have acknowledged the impact of COVID-19 on their education(6,21) and explored their role during  
24 the pandemic(26,27), to date no study has investigated the outlook of medical students on the effect  
25 of these changes. Therefore, we aimed to investigate their perceptions on the role of online learning  
26 in facilitating their education during the COVID-19 pandemic. Improving our understanding of this  
27 could help develop medical school curricula in the future.  
28  
29  
30  
31  
32  
33  
34  
35  
36  
37  
38  
39  
40  
41  
42  
43  
44  
45  
46  
47  
48  
49  
50  
51  
52  
53  
54  
55  
56  
57  
58  
59  
60



## **METHODOLOGY**

### **Questionnaire design and distribution**

This was a prospective, observational study conducted on a national level via an online survey. A 20-item questionnaire was devised following a literature search on current online learning methods and the effects of COVID-19 on medical education in the UK (Appendix I). Questions exploring the experiences of online learning were based on sections I-IV of the Dundee Ready Education Environment Measure (DREEM)(28), a validated questionnaire designed to measure the educational environment of medical schools and healthcare professionals(29). These were 5-point Likert-type questions, ranging from strongly agree to strongly disagree. The remaining items in the questionnaire comprised a mixture of question styles. Certain questions were conditional. The items were initially drafted and informally discussed with a group of medical students before undergoing a careful review and editing process. The final questions explored the following three themes:

1. General demographics
2. The use and experience of online learning during the COVID-19 pandemic
3. Perceived benefits and barriers of online learning

The survey was created using Qualtrics, an online survey software (Version XM, 2019, Provo, UT(30)), and distributed by medical students recruited nationally in order to maximise outreach to all 40 registered UK medical schools(31). The survey was accessible via an anonymous link and open for a one-week period (04/05/20 – 11/05/20).

### **Participants**

Undergraduate and postgraduate medical students across all years (years 1-5 and intercalated year) from all 40 registered UK medical schools(31) were eligible to participate.

## Patient and Public Involvement

As this study focused on medical students, patients or the general public were not involved in the study design. However, medical students were involved with the piloting of the survey as well as its distribution across medical schools.

## Participant consent and ethical considerations

Participation was voluntary, and participants were informed prior to starting the survey that all data collected was non-identifiable and would only be used for research purposes. A mandatory selection box consenting to participation and confirming that this was the first time completing this survey was included at the beginning of the survey, ensuring a 100% consent rate and preventing multiple responses. Ethical approval was requested from Imperial College London and was deemed not to be required as all data was anonymised, with informed consent taken from all participants.

## Data analysis

Data was exported from Qualtrics to Microsoft Excel (Excel version 16.29, 2019). Qualtrics and GraphPad Prism (Prism version 8.2.1, 2019) were both used to generate graphs and calculate descriptive statistics for the survey responses to explore patterns in responses. Multiple responses were accounted for by identifying unique IP addresses.

Wilcoxon test was used to compare hours of online learning usage before and after COVID-19. This was conducted following the Shapiro-Wilk and Kolmogorov-Smirnov normality tests which found the data set to be non-gaussian in distribution. *P*-values <0.05 were considered to be statistically significant.

## RESULTS

### Cohort demographics

Of the 2721 responses collected, 68.06% (n=1852) of respondents were female, 31.53% (n=858) were male, and 0.40% (n=11) identified as other. Responses were collected from 39 medical schools across the UK, from medical students across all years (Table 1).

**Table 1.** A table outlining the demographics (gender, university, and year of medical school) of students responding to the survey (n=2721).

| Demographic |                                                                 | Proportion of students, % (n) |
|-------------|-----------------------------------------------------------------|-------------------------------|
| Gender      | Male                                                            | 68.06 (1852)                  |
|             | Female                                                          | 31.53 (858)                   |
|             | Other                                                           | 0.40 (11)                     |
| University  | University of Aberdeen School of Medicine and Dentistry         | 1.76 (48)                     |
|             | Anglia Ruskin University School of Medicine                     | 2.21 (60)                     |
|             | Aston University Medical School                                 | 0.07 (2)                      |
|             | Barts and The London School of Medicine and Dentistry           | 6.39 (174)                    |
|             | University of Birmingham College of Medical and Dental Sciences | 1.76 (48)                     |
|             | Brighton and Sussex Medical School                              | 0.44 (12)                     |
|             | University of Bristol Medical School                            | 3.20 (87)                     |
|             | University of Buckingham Medical School                         | 0.77 (21)                     |
|             | University of Cambridge School of Clinical Medicine             | 1.29 (35)                     |
|             | Cardiff University School of Medicine                           | 9.22 (251)                    |
|             | University of Dundee School of Medicine                         | 0.40 (11)                     |
|             | The University of Edinburgh Medical School                      | 0.44 (12)                     |
|             | University of Exeter Medical School                             | 2.06 (56)                     |
|             | University of Glasgow School of Medicine                        | 0.70 (19)                     |
|             | Hull York Medical School                                        | 3.86 (105)                    |
|             | Imperial College London Faculty of Medicine                     | 3.93 (107)                    |
|             | Keele University School of Medicine                             | 0.85 (23)                     |
|             | Kent and Medway Medical School                                  | 0.04 (1)                      |
|             | King's College London GKT School of Medical Education           | 10.11 (275)                   |
|             | Lancaster University Medical School                             | 0.15 (4)                      |
|             | University of Leeds School of Medicine                          | 4.96 (135)                    |
|             | University of Leicester Medical School                          | 2.87 (78)                     |
|             | University of Liverpool School of Medicine                      | 8.38 (228)                    |
|             | University of Manchester Medical School                         | 4.52 (123)                    |
|             | Newcastle University School of Medical Education                | 3.34 (91)                     |
|             | Norwich Medical School                                          | 7.02 (191)                    |
|             | University of Nottingham School of Medicine                     | 3.31 (90)                     |
|             | University of Nottingham - Lincoln Medical School               | 0.07 (2)                      |
|             | University of Oxford Medical Sciences Division                  | 2.24 (61)                     |
|             | Plymouth University Peninsula Schools of Medicine and Dentistry | 0.55 (15)                     |
|             | Queen's University Belfast School of Medicine                   | 0.92 (25)                     |
|             | University of Sheffield Medical School                          | 0.99 (27)                     |

|      |                                                     |             |
|------|-----------------------------------------------------|-------------|
|      | University of Southampton School of Medicine        | 1.98 (54)   |
|      | University of St Andrews School of Medicine         | 0.33 (9)    |
|      | St George's, University of London                   | 2.46 (67)   |
|      | University of Sunderland School of Medicine         | 0.00 (0)    |
|      | Swansea University Medical School                   | 0.11 (3)    |
|      | University of Central Lancashire School of Medicine | 1.73 (47)   |
|      | University College London Medical School            | 2.46 (67)   |
|      | University of Warwick Medical School                | 2.09 (57)   |
| Year | Pre-clinical Year 1                                 | 23.19 (631) |
|      | Pre-clinical Year 2                                 | 19.85 (540) |
|      | Year 3                                              | 27.20 (740) |
|      | Penultimate Clinical Year                           | 20.62 (561) |
|      | Final Clinical Year                                 | 4.52 (123)  |
|      | Intercalating                                       | 4.63 (126)  |

### Student engagement with online learning platforms

Prior to the pandemic, students spent an average of 4-6 hours per week using online learning platforms. Students used a combination of video tutorials (27.71%), online question banks (26.18%), pre-recorded tutorials via their respective medical schools (20.96%) and online flashcards (15.99%). 4.46% of students utilised live tutorials via online platforms from their medical school (Figure 1). Other resources included the use of Anatomy TV, online notes such as Pulsenotes or TeachMeAnatomy, Acland's Anatomy videos, revision websites such as OSCE Stop and Zero To Finals, NICE guidelines, online textbooks and UpToDate, and BMJ Best Practice.

During the pandemic, students spent an average of 7-10 hours using online learning platforms, compared to 4-6 hours prior to the pandemic. The difference in hours prior to and during the COVID-19 pandemic were found to be significant ( $p < 0.05$ ). Similar numbers of students spent <1 hour on online learning platforms before and during the pandemic. However, there was an increase in numbers of students spending longer periods of time on online learning platforms, for example 7.35% (n=200) vs. 19.70% (n=641) of students spent >15 hours on online learning platforms before and during the pandemic (Figure 2). 57.28% of students reported that they were now taking examinations remotely, whilst the rest had examinations that had been postponed or cancelled.

## Medical school adaptations to COVID-19

Medical schools adapted to the pandemic in a combination of ways with 28.48% of students reporting their medical school to adapting to remote learning through the delivery of live tutorials via online platforms. Moreover, 42.19% of students reported that their medical school either introduced new resources to existing learning platforms or created a new online learning platform with new resources. Other medical schools have either a) not implemented anything as the curriculum had already been covered, or b) delayed teaching with the introduction of a question bank.

The online learning provided as an alternative by the medical schools followed a pre-set curriculum for 66.12% (n=1799) of students, was designed following student requests for 3.38% (n=92) of students, or using a combination of both for 30.50% (n=830) of students. This shows that student opinion was considered in the delivery of online learning.

Furthermore, 59.73% of students found that online teaching sessions have been interactive, with students finding the opportunity to interact via the chat box or by directly speaking to the lecturer. Some students have also specified that having small group sizes, group discussions, online case simulations and quizzes have been useful in increasing their engagement.

## Student perception of online learning

Students ranked their experience of online learning using a Likert scale with 1 being strongly disagree and 5 being strongly agree (Table 2). Students agreed that learning online was engaging, enjoyable and allowed room for questions. However, students appeared to want online learning to be more interactive and did not find it as effective as face to face teaching.

**Table 2.** A table displaying students' perceptions on their experiences of online learning, ranked on a Likert scale from 1-5, where 1=strongly disagree and 5=strongly agree. Likert scores have been shown as mean  $\pm$  standard deviation ( $\pm$ SD)

| Statement                                                         | Mean | $\pm$ SD |
|-------------------------------------------------------------------|------|----------|
| The teaching is often stimulating                                 | 2.75 | 1.18     |
| I find it easy to engage in the lesson                            | 2.55 | 1.30     |
| I feel able to ask the questions I want                           | 2.70 | 1.53     |
| I enjoy the online teaching                                       | 2.62 | 1.37     |
| I would like the online teaching to be more interactive           | 3.04 | 1.44     |
| I feel that online teaching is as effective as face-face teaching | 1.92 | 1.45     |
| I prefer online teaching to face-face teaching                    | 1.69 | 1.48     |
| The teachers are well prepared for the teaching sessions          | 3.36 | 1.42     |
| I feel I am being well prepared for my profession                 | 2.28 | 1.33     |
| My internet connection can be problematic                         | 2.53 | 1.74     |

The main advantages of online learning appeared to be that it saves students time on travelling (19.82%), the flexibility it provides (19.52%), the ability for students to learn at their own pace (18.63%), it is more comfortable (15.84%), and it cuts costs (14.24%) (Figure 3A). Other medical students (n=82) also commented that it provides time efficiency, allows more time for students to focus on preparing for clinical placements, reduces anxiety, and being able to be in a different country.

On the other hand, students stated that family distractions (26.76%), internet connection (21.53%), timing of tutorials (17.31%), anxiety (11.08%), and lack of space (11.03%) as barriers to effective online learning (Figure 3B). Students also commented on experiencing a lack of motivation, difficulty concentrating and asking questions, and a lack of contact with colleagues as further limitations.

### **Role of online learning in clinical teaching**

75.99% (n=1842) of medical students felt that online learning had not successfully replaced the clinical teaching they received via direct patient contact, with 82.17% (n=1986) of students feeling they cannot learn practical clinical skills through online learning. This shows that clinical skills remain a pertinent barrier to online learning of medical students.

**Student perception on effectiveness of online learning**

Students ranked the effectiveness of online learning with 1 being most effective and 5 being least effective. Video tutorials e.g. YouTube/Osmosis appeared to be the most effective, followed by online question banks, and live tutorials, whilst students commented using a variety of other sources.

For peer review only

## DISCUSSION

With the rise of COVID-19, it is unsurprising that many medical institutions have resorted to online education platforms. However, online education has been used preceding this pandemic. Here, we discuss how this pandemic has shaped the use of online learning currently as well as its application in the future of medical education.

Our study found a significant difference ( $p < 0.05$ ) in the time spent on online learning platforms before and during the pandemic, with a greater number of hours spent amidst the pandemic. This result was expected as the primary source of education and engagement of students with their medical schools was online. This is in addition to the normative use of online learning resources before the pandemic and forced isolation. This is despite that many students reported the cancellation of clinical examinations and conversion of written examinations into open book, which would arguably reduce student engagement with any learning platform. Nevertheless, students recognise the importance of their studies for their future careers as clinicians, this is in accordance with the duties of medical students outlined by the GMC(32).

The development of innovative educational projects has been initiated to enhance remote medical education(19). A rise in external resources and teaching programs such as Osmosis, BiteMedicine, Becoming A Doctor and Sustaining Medical education in a Lockdown Environment (SMILE) has allowed many teaching sessions to be made available to medical students across the country. Hence, students may learn from a wider community of professionals. However, the high flow of resources causes a proliferation of choice which may increase burnout rates. Schwartz claimed that this choice overload is due to the failure of universities on fulfilling their education role to their students(33,34). Yet, the increase in demand suggests that students desire this flexible curriculum.



1  
2  
3 The accessibility of online material may have contributed to a high absenteeism and increase  
4 disengagement in medical schools; limited interaction with lecturers may add to this(35). To tackle  
5 this, Evans *et al.* suggested incorporating online Q&A sessions to improve student engagement(13),  
6 based on a previous model advising the use of synchronous learning(36). Synchronous learning is  
7 defined as a social learning environment alongside answering questions live(37). This active  
8 communication between lecturers and students allows ambiguous concepts to be addressed  
9 immediately to increase student involvement, creating a more active learning environment. Indeed,  
10 our results show that students would like online teaching sessions to be more interactive.  
11  
12  
13  
14  
15  
16  
17  
18  
19  
20  
21  
22

23 To students, the main advantages of online learning are the time and money saved from the lack of  
24 travel, its flexibility and the ability for students to learn at their own pace (Figure 3A). However, Zureick  
25 *et al.* showed that watching pre-recorded lectures negatively correlated with learning success, with  
26 higher reported rates of distractions and interruptions(38). Yet, there are benefits of online  
27 lectures(14) which can enable students to anonymously ask and answer questions, potentially  
28 encouraging further engagement from those who would not otherwise participate in a live lecture.  
29 Alternatively, with the afore mentioned distractions that students may face, the lack of focus may  
30 result in a decrease in participation. Although students found small group teaching beneficial, it may  
31 strip students of anonymity, reducing voluntary participation.  
32  
33  
34  
35  
36  
37  
38  
39  
40  
41  
42  
43  
44  
45

46 The main barriers to online learning appear to be family distractions, internet connection and the  
47 timing of tutorials (Figure 3B). This may disadvantage students with large families or with limited  
48 internet access. Moreover, the mental health of students, recently shown to be impacted by the  
49 COVID-19 pandemic(39), may be adversely affected as indicated by the free text responses. This may  
50 be, in part, attributed to the lack of interaction with friends and colleagues leading to a rise in anxiety.  
51 Alternatively, with exams being open book and with an unrestricted setting, students may be less  
52  
53  
54  
55  
56  
57  
58  
59  
60

1  
2  
3 prone to exam anxiety(40). Although, this does not address the family and noise disturbances which  
4  
5 may still affect exam performance.  
6  
7  
8  
9

10 On the other hand, medical students are being asked to 'step-up' and join the front-line of doctors  
11 tackling COVID-19(41). As well as the early graduation of UK medical students(42), many universities  
12 have given their students the opportunity to volunteer. For example, the University of Birmingham  
13 has facilitated for over 700 medical students to volunteer in the NHS(27). Although medical schools  
14 have halted clinical placements, this opportunity could provide more exposure, undoubtedly  
15 impacting the development of medical students. However, for those who are not volunteering due to  
16 living with vulnerable family members or having health conditions themselves, this would then put  
17 them at a disadvantage as their peers continue to gain clinical exposure.  
18  
19  
20  
21  
22  
23  
24  
25  
26  
27  
28  
29

30 As lockdown restrictions ease and students slowly return to medical school, clinical placements may  
31 incorporate more virtual aspects as healthcare evolves(22). Indeed, new platforms have been  
32 developed by the NHS (e.g. NHS NearMe) which have shown that video consultations are better than  
33 telephone consultations in reducing medical error and improving patient outcomes(31). However,  
34 Professor Martin Marshall, chairman of the RCGP, has highlighted that most consultations are still  
35 taking place over the phone as opposed to video calls(43). This may be subject to change with a  
36 demographic who are increasingly familiar with the use of the internet. Additionally, in Germany,  
37 online platforms as observed in Dermatology may "provide a safe and efficient alternative for face-  
38 face outpatient care"(25), abiding by social distancing rules.  
39  
40  
41  
42  
43  
44  
45  
46  
47  
48  
49  
50  
51

52 Furthermore, the digitalisation of medical teaching could play a significant role in the future of medical  
53 schools. Allowing users to tailor their learning and acquire new skills through the chaotic nature of an  
54 amplitude of resources could halt the development of medical students. Having discussed benefits of  
55 both face-to-face and remote teaching as well as the future of healthcare online, we suggest that in  
56  
57  
58  
59  
60

1  
2  
3 order to maximise the benefits of these learning methods, a mixture of online and in person teaching  
4 should be utilised moving forward. This can be incorporated into an effective learning method such  
5 as problem-based learning or team-based learning which have been shown to improve learning  
6 outcomes(44,45). Students are set online materials to study and are then are expected to discuss  
7 content in person in a group tutorial(46). This allows students to study at their own pace, in a manner  
8 suitable to them, while also holding them accountable for their own learning.  
9  
10  
11  
12  
13  
14  
15  
16  
17  
18

### 19 **Limitations and Future work**

20  
21  
22  
23 This is the first study to look at the impact of COVID-19 on online learning across the UK, with  
24 responses from 39/40 medical schools. One of the strengths of this study is its large sample size of  
25 2792 medical student across all pre-clinical and clinical years. However, this study also had some  
26 limitations. Some medical schools may have been disproportionately represented with larger numbers  
27 of responses from some schools e.g. Kings College London, compared to newer medical schools such  
28 as Aston or Kent, potentially skewing results due to sample bias. Furthermore, some aspects of this  
29 survey depended on participants' memory perhaps influencing their reporting, introducing elements  
30 of recall bias. Also, it is important to note that the period covered is usually when students have  
31 examinations, hence students may have been spending more time on online learning platforms  
32 regardless. In addition, since this survey, medical schools may have updated their online resources.  
33  
34 To truly measure the impact of COVID-19 on student utilisation of online learning, a more in-depth,  
35 qualitative analysis such as focus groups conducted in collaboration with medical schools is required  
36 to gather more accurate results, such as the effects on examination performance.  
37  
38  
39  
40  
41  
42  
43  
44  
45  
46  
47  
48  
49  
50  
51  
52  
53  
54  
55  
56  
57  
58  
59  
60

### Author Contributions

SD contributed to the study concept and design, and developed the questionnaire. SD recruited collaborators for survey distribution and data collection. SD supervised the project, had full access to the data, controlled the decision to publish, and accepts full responsibility for the conduct of this study, as the guarantor. AH and SD contributed equally to this study as joint first authors. AH developed and designed the questionnaire, contributed to data acquisition and interpretation, writing and critical revision of the manuscript. AH is the corresponding author and managed project administration. MS developed the questionnaire, contributed to data acquisition and interpretation, and writing and critical revision of the manuscript. AA developed the questionnaire, and contributed to data visualisation and presentation, and writing and critical revision of the manuscript. LA performed data analysis, interpretation, visualisation and presentation, and contributed to writing and critical revision of the manuscript. All authors approved the final version to be published and are accountable for all aspects of the work. Sixteen students were involved with survey distribution and data collection.

### Acknowledgements

We thank Bonita Sinartio, Shweta Madhusudanan, Harri Gruffydd Jones, Victoria Selwyn, Rebecca Conway-Jones, Aqsa Javed, Esmée Nourizadeh, Jack Alan Tagg, Ayshia Bibi, Hyacintha Celine Hazna Imelda, Sonya Gibson, Kauther Al-Kaaby, Sharma Kansal, Muzammil Ali Khan, Haya Maki, and Maryam Goralwalla, for their assistance in distributing the survey link and collecting data. We would also like to express our gratitude to our supervisor, Dr Samiullah Dost, for his guidance and support throughout the course of this study.

### Copyright

1  
2  
3 I, the Submitting Author has the right to grant and does grant on behalf of all authors of the Work (as  
4 defined in the below author licence), an exclusive licence for contributions from authors who are: i)  
5 UK Crown employees; ii) where BMJ has agreed a CC BY licence shall apply, and/or iii) in accordance  
6 with the terms applicable for US Federal Government officers or employees acting as part of their  
7 official duties; on a worldwide, perpetual, irrevocable, royalty-free basis to BMJ Publishing Group Ltd  
8 ("BMJ") its licensees and where the relevant Journal is co-owned by BMJ to the co-owners of the  
9 Journal, to publish the Work in BMJ Open and any other BMJ products and to exploit all rights, as set  
10 out in our licence.  
11  
12  
13  
14  
15  
16  
17  
18  
19  
20  
21  
22

23 The Submitting Author accepts and understands that any supply made under these terms is made by  
24 BMJ to the Submitting Author unless you are acting as an employee on behalf of your employer or a  
25 postgraduate student of an affiliated institution which is paying any applicable article publishing  
26 charge ("APC") for Open Access articles. Where the Submitting Author wishes to make the Work  
27 available on an Open Access basis (and intends to pay the relevant APC), the terms of reuse of such  
28 Open Access shall be governed by a Creative Commons licence – details of these licences and which  
29 Creative Commons licence will apply to this Work are set out in our licence referred to above.  
30  
31  
32  
33  
34  
35  
36  
37  
38  
39  
40

### 41 **Competing Interests**

42 All authors have completed the ICMJE Unified Competing Interest form (available on request from the  
43 corresponding author) and declare: no support from any organisation for the submitted work; no  
44 financial relationships with any organisations that might have an interest in the submitted work in the  
45 previous three years, no other relationships or activities that could appear to have influenced the  
46 submitted work.  
47  
48  
49  
50  
51  
52  
53

### 54 **Data sharing**

1  
2  
3 Raw data are available upon request from the corresponding author  
4  
5 ([aleena.hossain16@imperial.ac.uk](mailto:aleena.hossain16@imperial.ac.uk)). Due to the anonymous nature of the survey, it was not possible  
6  
7 to disseminate the results of this study to the participants.  
8  
9

### 10 11 12 **Transparency statement**

13  
14 The lead author confirms that the manuscript is an honest, accurate, and transparent account of the  
15  
16 study; no important aspects of the study have been omitted; and any discrepancies from the study as  
17  
18 originally planned have been explained.  
19

### 20 21 22 **Ethical approval**

23  
24 Ethical approval was requested from Imperial College London and was deemed not to be required as  
25  
26 all data was anonymised, with informed consent taken from all participants. The work was carried out  
27  
28 in accordance with the Declaration of Helsinki, including, but not limited to the anonymity of  
29  
30 participants being guaranteed and the informed consent of participants being obtained.  
31  
32  
33

### 34 35 36 **Funding**

37  
38 This research received no specific grant from any funding agency in the public, commercial or not-  
39  
40 for-profit sectors.  
41  
42  
43  
44  
45  
46  
47  
48  
49  
50  
51  
52  
53  
54  
55  
56  
57  
58  
59  
60

## References

1. Moss P, Barlow G, Easom N, et al. Lessons for managing high-consequence infections from first COVID-19 cases in the UK. *The Lancet*. [Online] 2020;395(10227): E46. Available from: doi:10.1016/S0140-6736(20)30463-3
2. World Health Organisation. *WHO announces COVID-19 outbreak a pandemic*. [Online] World Health Organisation. Available from: <http://www.euro.who.int/en/health-topics/health-emergencies/coronavirus-covid-19/news/news/2020/3/who-announces-covid-19-outbreak-a-pandemic> [Accessed: 31st May 2020]
3. Johnson B. *PM address to the nation on coronavirus: 23 March 2020*. [Online] GOV.UK. Available from: <https://www.gov.uk/government/speeches/pm-address-to-the-nation-on-coronavirus-23-march-2020> [Accessed: 29th May 2020]
4. Hancock M. *Controlling the spread of COVID-19: Health Secretary's statement to Parliament*. [Online] GOV.UK. Available from: <https://www.gov.uk/government/speeches/controlling-the-spread-of-covid-19-health-secretarys-statement-to-parliament> [Accessed: 31st May 2020]
5. Stevens S, Pritchard A. *Letter to chief executives of all NHS trusts and foundation trusts, CCG accountable officers, GP practices and primary care networks, and providers of community health services*. [Online] NHS England and NHS Improvement. Available from: <https://www.england.nhs.uk/coronavirus/wp-content/uploads/sites/52/2020/03/urgent-next-steps-on-nhs-response-to-covid-19-letter-simon-stevens.pdf> [Accessed: 29th May 2020]
6. Sandhu P, de Wolf M. The impact of COVID-19 on the undergraduate medical curriculum. *Medical Education Online*. [Online] 2020;25(1). Available from: doi:10.1080/10872981.2020.1764740
7. General Medical Council. *Information for medical students*. [Online] General Medical Council. Available from: <https://www.gmc-uk.org/news/news-archive/coronavirus-information-and-advice/information-for-medical-students> [Accessed: 27th May 2020]

- 1  
2  
3 8. O'Doherty D, Dromey M, Lougheed J, et al. Barriers and solutions to online learning in  
4  
5 medical education - An integrative review. *BMC Medical Education*. [Online] 2018;18: 130.  
6  
7 Available from: doi:10.1186/s12909-018-1240-0  
8  
9
- 10 9. Harden RM. Trends and the future of postgraduate medical education. *Emergency Medicine*  
11  
12 *Journal*. [Online] 2006;23(10): 798–802. Available from: doi:10.1136/emj.2005.033738  
13
- 14 10. Moran J, Briscoe G, Peglow S. Current Technology in Advancing Medical Education:  
15  
16 Perspectives for Learning and Providing Care. *Academic Psychiatry*. [Online] 2018;42: 796–  
17  
18 799. Available from: doi:10.1007/s40596-018-0946-y  
19
- 20 21 11. Lochner L, Wieser H, Waldboth S, et al. Combining traditional anatomy lectures with e-  
22  
23 learning activities: how do students perceive their learning experience? *International journal*  
24  
25 *of medical education*. [Online] 2016;7: 69–74. Available from: doi:10.5116/ijme.56b5.0369  
26  
27
- 28 12. Pei L, Wu H. Does online learning work better than offline learning in undergraduate medical  
29  
30 education? A systematic review and meta-analysis. *Medical Education Online*. [Online] 2019;  
31  
32 Available from: doi:10.1080/10872981.2019.1666538  
33
- 34 13. Evans DJR, Bay BH, Wilson TD, et al. Going Virtual to Support Anatomy Education: A STOP  
35  
36 GAP in the Midst of the Covid-19 Pandemic. *Anatomical sciences education*. [Online]  
37  
38 2020;13(3): 279–283. Available from: doi:10.1002/ase.1963  
39  
40
- 41 14. Kay D, Pasarica M. Using technology to increase student (and faculty satisfaction with)  
42  
43 engagement in medical education. *Advances in physiology education*. [Online] 2019;43(3):  
44  
45 408–413. Available from: doi:10.1152/advan.00033.2019  
46  
47
- 48 15. Universities UK International. *INTERNATIONAL FACTS AND FIGURES 2019*. [Online]  
49  
50 Universities UK International. Available from:  
51  
52 [https://www.universitiesuk.ac.uk/International/Documents/2019/International\\_facts\\_and](https://www.universitiesuk.ac.uk/International/Documents/2019/International_facts_and_figures_slides.pdf)  
53  
54 [figures\\_slides.pdf](https://www.universitiesuk.ac.uk/International/Documents/2019/International_facts_and_figures_slides.pdf) [Accessed: 30th May 2020]  
55  
56
- 57 16. Khalil MK, Abdel Meguid EM, Elkhider IA. Teaching of anatomical sciences: A blended learning  
58  
59 approach. *Clinical Anatomy*. [Online] 2018;31(3): 323–329. Available from:  
60



- 1  
2  
3 doi:10.1002/ca.23052  
4  
5  
6 17. Barry DS, Marzouk F, Chulak-Oglu K, et al. Anatomy education for the YouTube generation.  
7  
8 *Anatomical Sciences Education*. [Online] 2016;9(1): 90–96. Available from:  
9  
10 doi:10.1002/ase.1550  
11  
12 18. Longhurst GJ, Stone DM, Dulohery K, et al. Strength, Weakness, Opportunity, Threat (SWOT)  
13  
14 Analysis of the Adaptations to Anatomical Education in the United Kingdom and Republic of  
15  
16 Ireland in Response to the COVID-19 Pandemic. *Anatomical sciences education*. [Online]  
17  
18 2020;13(3): 301–311. Available from: doi:10.1002/ase.1967  
19  
20  
21 19. Huddart D, Hirniak J, Sethi R, et al. #Med StudentCovid – How social media is supporting  
22  
23 students during COVID-19. *Medical Education*. [Online] 2020; Available from:  
24  
25 doi:10.1111/medu.14215  
26  
27  
28 20. Gallo G, Sturiale A, De Simone V, et al. Epistemic Networks on Twitter: A New Way To Learn.  
29  
30 *Journal of Investigative Surgery*. [Online] 2019; Available from:  
31  
32 doi:10.1080/08941939.2019.1656787  
33  
34  
35 21. Ahmed H, Allaf M, Elghazaly H. *COVID-19 and medical education*. [Online] The Lancet  
36  
37 Infectious Diseases. 2020. Available from: doi:10.1016/S1473-3099(20)30226-7  
38  
39  
40 22. Rose S. Medical Student Education in the Time of COVID-19. *JAMA*. [Online] 2020;323(21):  
41  
42 2131–2132. Available from: doi:10.1001/jama.2020.5227  
43  
44  
45 23. Wong TW, Lee CK, Tam W, et al. Cluster of SARS among Medical Students Exposed to Single  
46  
47 Patient, Hong Kong. *Emerging Infectious Diseases*. [Online] 2004;10(2): 269–276. Available  
48  
49 from: doi:10.3201/eid1002.030452  
50  
51  
52 24. Roberts M. *Coronavirus: Has the NHS got enough PPE?*. [Online] BBC News. Available from:  
53  
54 <https://www.bbc.co.uk/news/health-52254745> [Accessed: 31st May 2020]  
55  
56  
57 25. Reinholz M, French LE. Medical education and care in dermatology during the SARS-CoV2  
58  
59 pandemic: challenges and chances. *Journal of the European Academy of Dermatology and*  
60 *Venereology : JEADV*. [Online] 2020;34(5): e214–e216. Available from: doi:10.1111/jdv.16391

- 1  
2  
3 26. Baker DM, Bhatia S, Brown S, et al. Medical student involvement in the COVID-19 response.  
4  
5 *The Lancet*. [Online] 2020;395(10232): 1254. Available from: doi:10.1016/S0140-  
6  
7 6736(20)30795-9  
8  
9  
10 27. Watson A, McKinnon T, Prior SD, et al. COVID-19: time for a bold new strategy for medical  
11  
12 education. *Medical Education Online*. [Online] 2020;25(1). Available from:  
13  
14 doi:10.1080/10872981.2020.1764741  
15  
16 28. Roff S, McAleer S, Harden RM, et al. Development and validation of the Dundee Ready  
17  
18 Education Environment Measure (DREEM). *Medical Teacher*. [Online] 1997;19(4): 295–299.  
19  
20 Available from: doi:10.3109/01421599709034208  
21  
22  
23 29. Miles S, Swift L, Leinster SJ. The Dundee Ready Education Environment Measure (DREEM): A  
24  
25 review of its adoption and use. *Medical Teacher*. [Online] 2012;34: e620–e634. Available  
26  
27 from: doi:10.3109/0142159X.2012.668625  
28  
29  
30 30. Qualtrics. *Qualtrics*. [Online] Provo, Utah, USA; 2019. Available from:  
31  
32 <https://www.qualtrics.com>  
33  
34 31. Medical Schools Council. *Medical Schools A-Z*. [Online] Available from:  
35  
36 <https://www.medschools.ac.uk/studying-medicine/medical-schools> [Accessed: 28th May  
37  
38 2020]  
39  
40  
41 32. General Medical Council, Medical Schools Council. *Achieving good medical practice :  
42  
43 guidance for medical students*. [Online] May 2016. Available from: doi:10.1002/hc.21364  
44  
45 [Accessed: 31st May 2020]  
46  
47  
48 33. Schwartz B. The Tyranny of Choice. *Scientific American*. [Online] 2004;290(4): 70–75.  
49  
50 Available from: doi:10.1038/scientificamerican0404-70  
51  
52  
53 34. Ackerman DS, Gross BL. How many choices are good? Measurement of the effects of course  
54  
55 choice on perceptions of a marketing option. *Journal of Marketing Education*. [Online]  
56  
57 2006;28(1): 69–80. Available from: doi:10.1177/0273475305284642  
58  
59  
60 35. Moszkowicz D, Duboc H, Dubertret C, et al. Daily medical education for confined students

- 1  
2  
3 during COVID-19 pandemic: A simple videoconference solution. *Clinical Anatomy*. [Online]  
4  
5 2020; 1–2. Available from: doi:10.1002/ca.23601  
6  
7  
8 36. Chen NS, Ko HC, Kinshuk, et al. A model for synchronous learning using the Internet.  
9  
10 *Innovations in Education and Teaching International*. [Online] 2005;42(2): 181–194. Available  
11  
12 from: doi:10.1080/14703290500062599  
13  
14 37. Hrastinski S. Asynchronous & Synchronous E-Learning. *EDUCAUSE Quarterly*. [Online] 2008;4.  
15  
16 Available from: <https://er.educause.edu/-/media/files/article-downloads/eqm0848.pdf>  
17  
18 [Accessed: 28th May 2020]  
19  
20 38. Zureick AH, Burk-Rafel J, Purkiss JA, et al. The interrupted learner: How distractions during  
21  
22 live and video lectures influence learning outcomes. *Anatomical Sciences Education*. [Online]  
23  
24 2018;11(4): 366–376. Available from: doi:10.1002/ase.1754  
25  
26 39. Cao W, Fang Z, Hou G, et al. The psychological impact of the COVID-19 epidemic on college  
27  
28 students in China. *Psychiatry Research*. [Online] 2020;287. Available from:  
29  
30 doi:10.1016/j.psychres.2020.112934  
31  
32 40. Stowell J, Bennett D. Effects of online testing on student exam performance and test anxiety.  
33  
34 *Journal of Educational Computing Research*. [Online] 2010;42(2): 161–171. Available from:  
35  
36 doi:10.2190/EC.42.2.b  
37  
38 41. Mahase E. Covid-19: medical students to be employed by NHS as part of epidemic response.  
39  
40 *BMJ (Clinical research ed.)*. [Online] 2020;368: m1156. Available from:  
41  
42 doi:10.1136/bmj.m1156  
43  
44 42. British Medical Association. *COVID-19: early provisional registration for final year students*.  
45  
46 [Online] BMA - COVID-19. Available from: [https://www.bma.org.uk/advice-and-](https://www.bma.org.uk/advice-and-support/covid-19/returning-to-the-nhs-or-starting-a-new-role/covid-19-early-provisional-registration-for-final-year-students)  
47  
48 [support/covid-19/returning-to-the-nhs-or-starting-a-new-role/covid-19-early-provisional-](https://www.bma.org.uk/advice-and-support/covid-19/returning-to-the-nhs-or-starting-a-new-role/covid-19-early-provisional-registration-for-final-year-students)  
49  
50 [registration-for-final-year-students](https://www.bma.org.uk/advice-and-support/covid-19/returning-to-the-nhs-or-starting-a-new-role/covid-19-early-provisional-registration-for-final-year-students) [Accessed: 28th May 2020]  
51  
52  
53  
54 43. Lynch P, Wainwright D. *Coronavirus: How GPs have stopped seeing most patients in person*.  
55  
56 [Online] BBC News. Available from: <https://www.bbc.co.uk/news/uk-england-52216222>  
57  
58  
59  
60

1  
2  
3 [Accessed: 31st May 2020]  
4

- 5 44. Yew EHJ, Goh K. Problem-Based Learning: An Overview of its Process and Impact on Learning.  
6 *Health Professions Education*. [Online] 2016;2(2): 75–79. Available from:  
7  
8 doi:10.1016/j.hpe.2016.01.004  
9  
10  
11 45. Clark CE. Problem-based learning: How do the outcomes compare with traditional teaching?  
12 *British Journal of General Practice*. [Online] 2006;56(530): 722–723. Available from:  
13  
14 https://www.ncbi.nlm.nih.gov/pmc/articles/PMC1876647/ [Accessed: 30th May 2020]  
15  
16  
17 46. Chang BJ. Problem-based learning in medical school: A student’s perspective. *Annals of*  
18 *Medicine and Surgery*. [Online] 2016;12: 88–89. Available from:  
19  
20  
21  
22  
23 doi:10.1016/j.amsu.2016.11.011  
24  
25  
26  
27  
28  
29  
30  
31  
32  
33  
34  
35  
36  
37  
38  
39  
40  
41  
42  
43  
44  
45  
46  
47  
48  
49  
50  
51  
52  
53  
54  
55  
56  
57  
58  
59  
60

### Figure Legends

**Figure 1.** Students were asked about the different types of online learning platforms they used before the COVID-19 pandemic as represented by this bar chart (n=2721).

**Figure 2.** Students were asked the approximate number of hours spent on online learning platforms before and during the COVID-19 pandemic as represented by this bar chart (n=2721). A Wilcoxon test was then conducted which found the difference to be significant ( $p < 0.05$ ).

**Figure 3.** A bar chart outlining the advantages of and barriers to online learning. A- Students were provided with a list of potential ways in which online learning was advantageous and they were asked to select all which applied to them. They were also given the option to input their own statements (n=2721). B- Students were provided with a list of potential barriers to the benefits they may receive from online learning and they were asked to select all which applied to them. They were also given the option to input their own statements (n=2721).

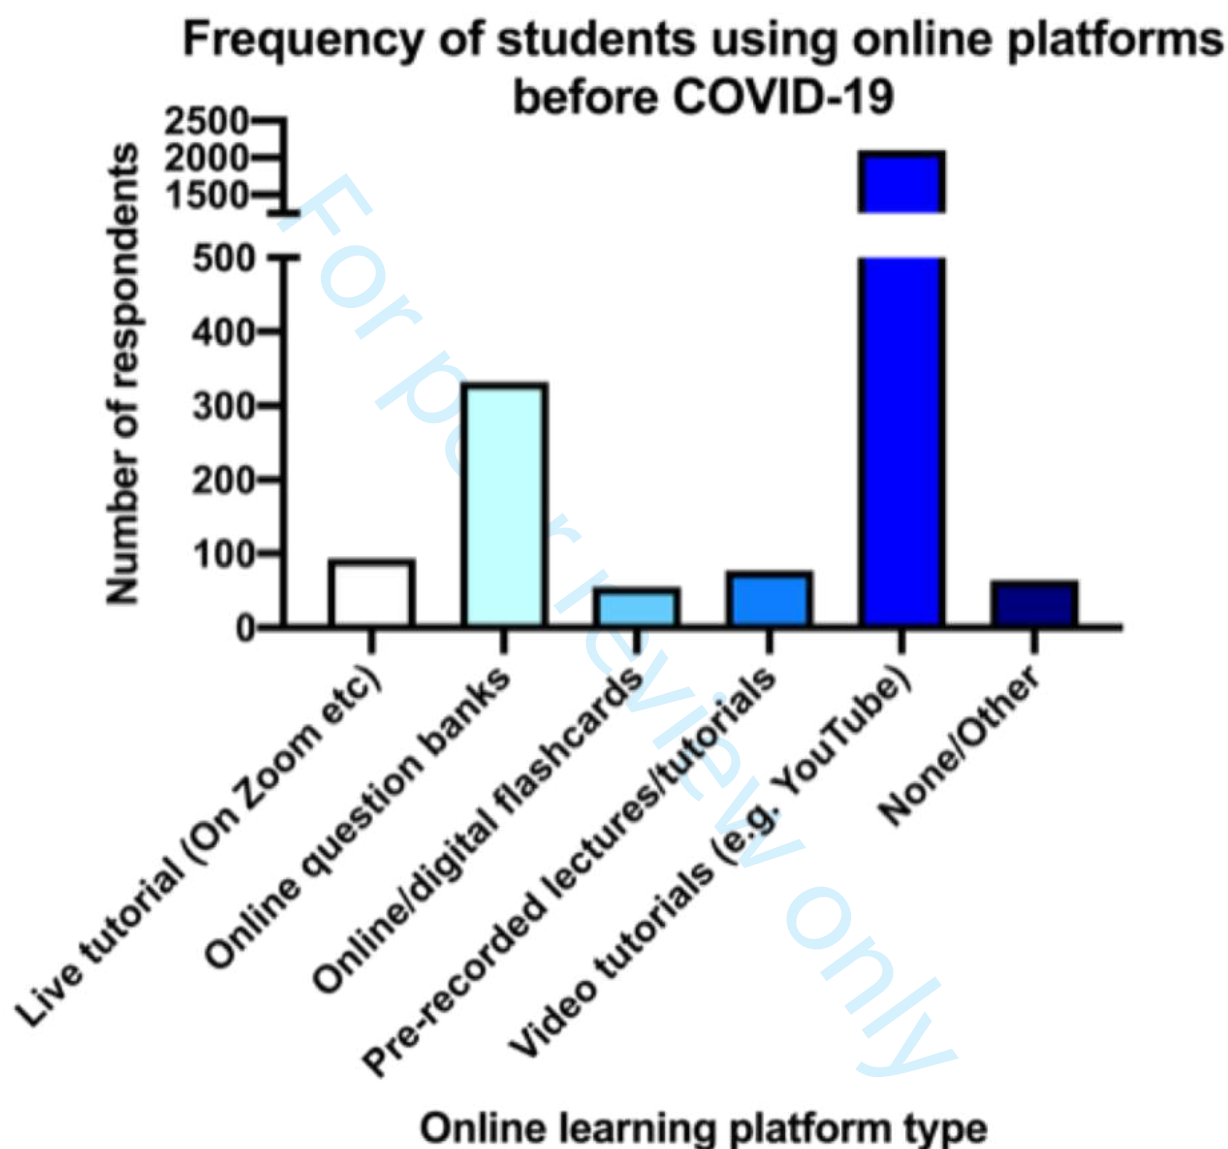

48  
49  
50  
51  
52  
53  
54  
55  
56  
57  
58  
59  
60

**Figure 1.** Students were asked about the different types of online learning platforms they used before the COVID-19 pandemic as represented by this bar chart (n=2721).

## Number of hours spent on online platforms before and during COVID-19 pandemic

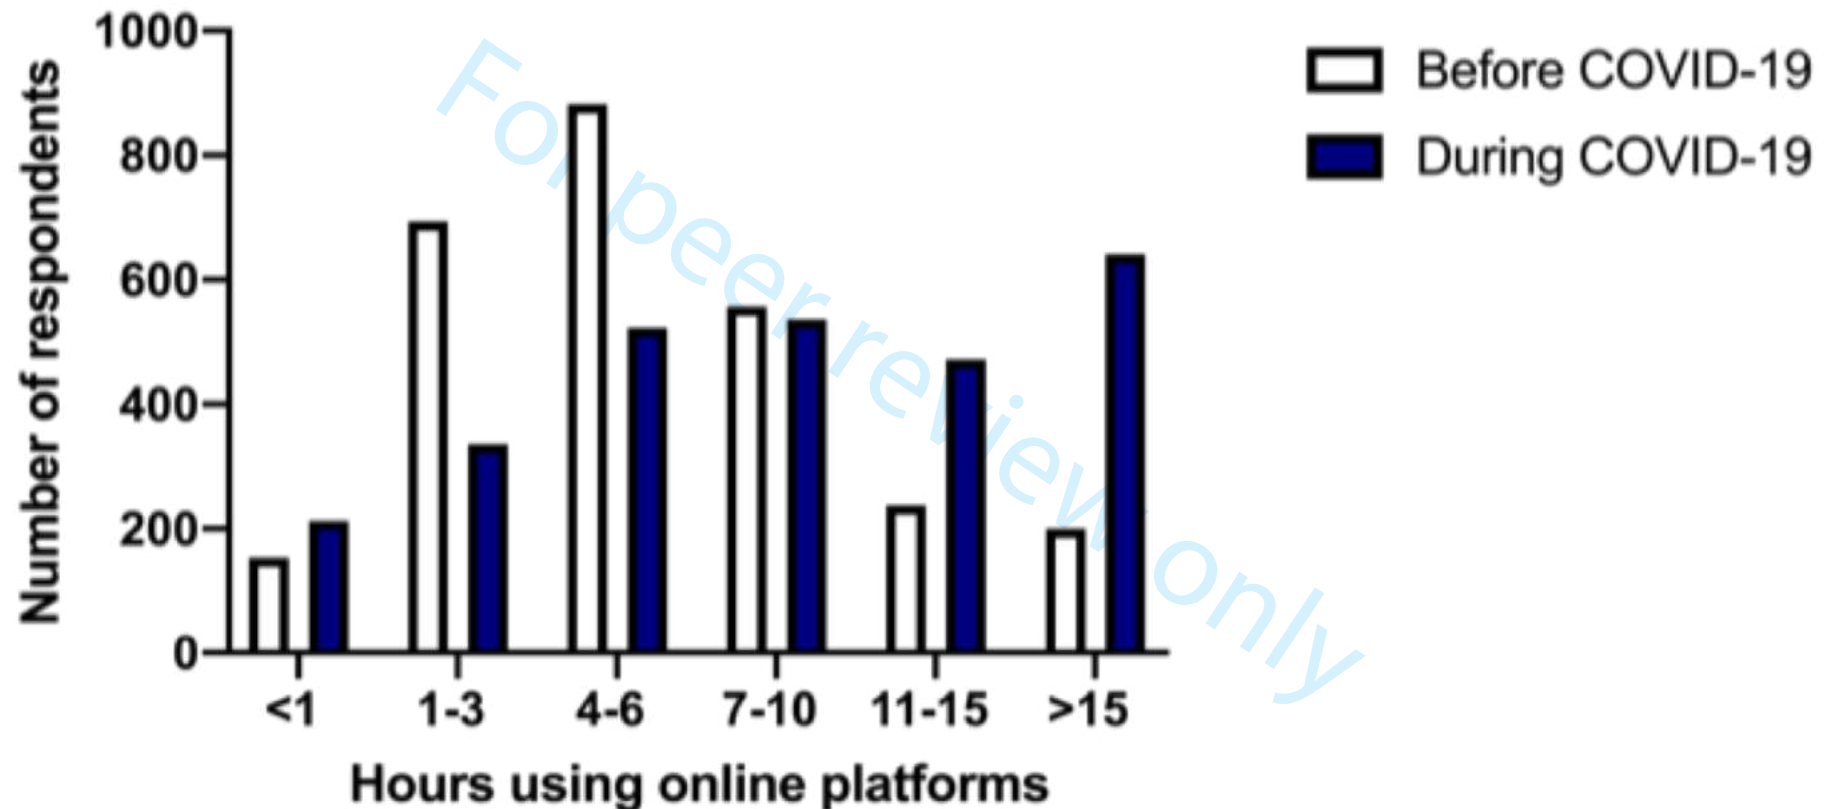

**Figure 2.** Students were asked the approximate number of hours spent on online learning platforms before and during the COVID-19 pandemic as represented by this bar chart (n=2721). A Wilcoxon test was then conducted which found the difference to be significant ( $p < 0.05$ ).

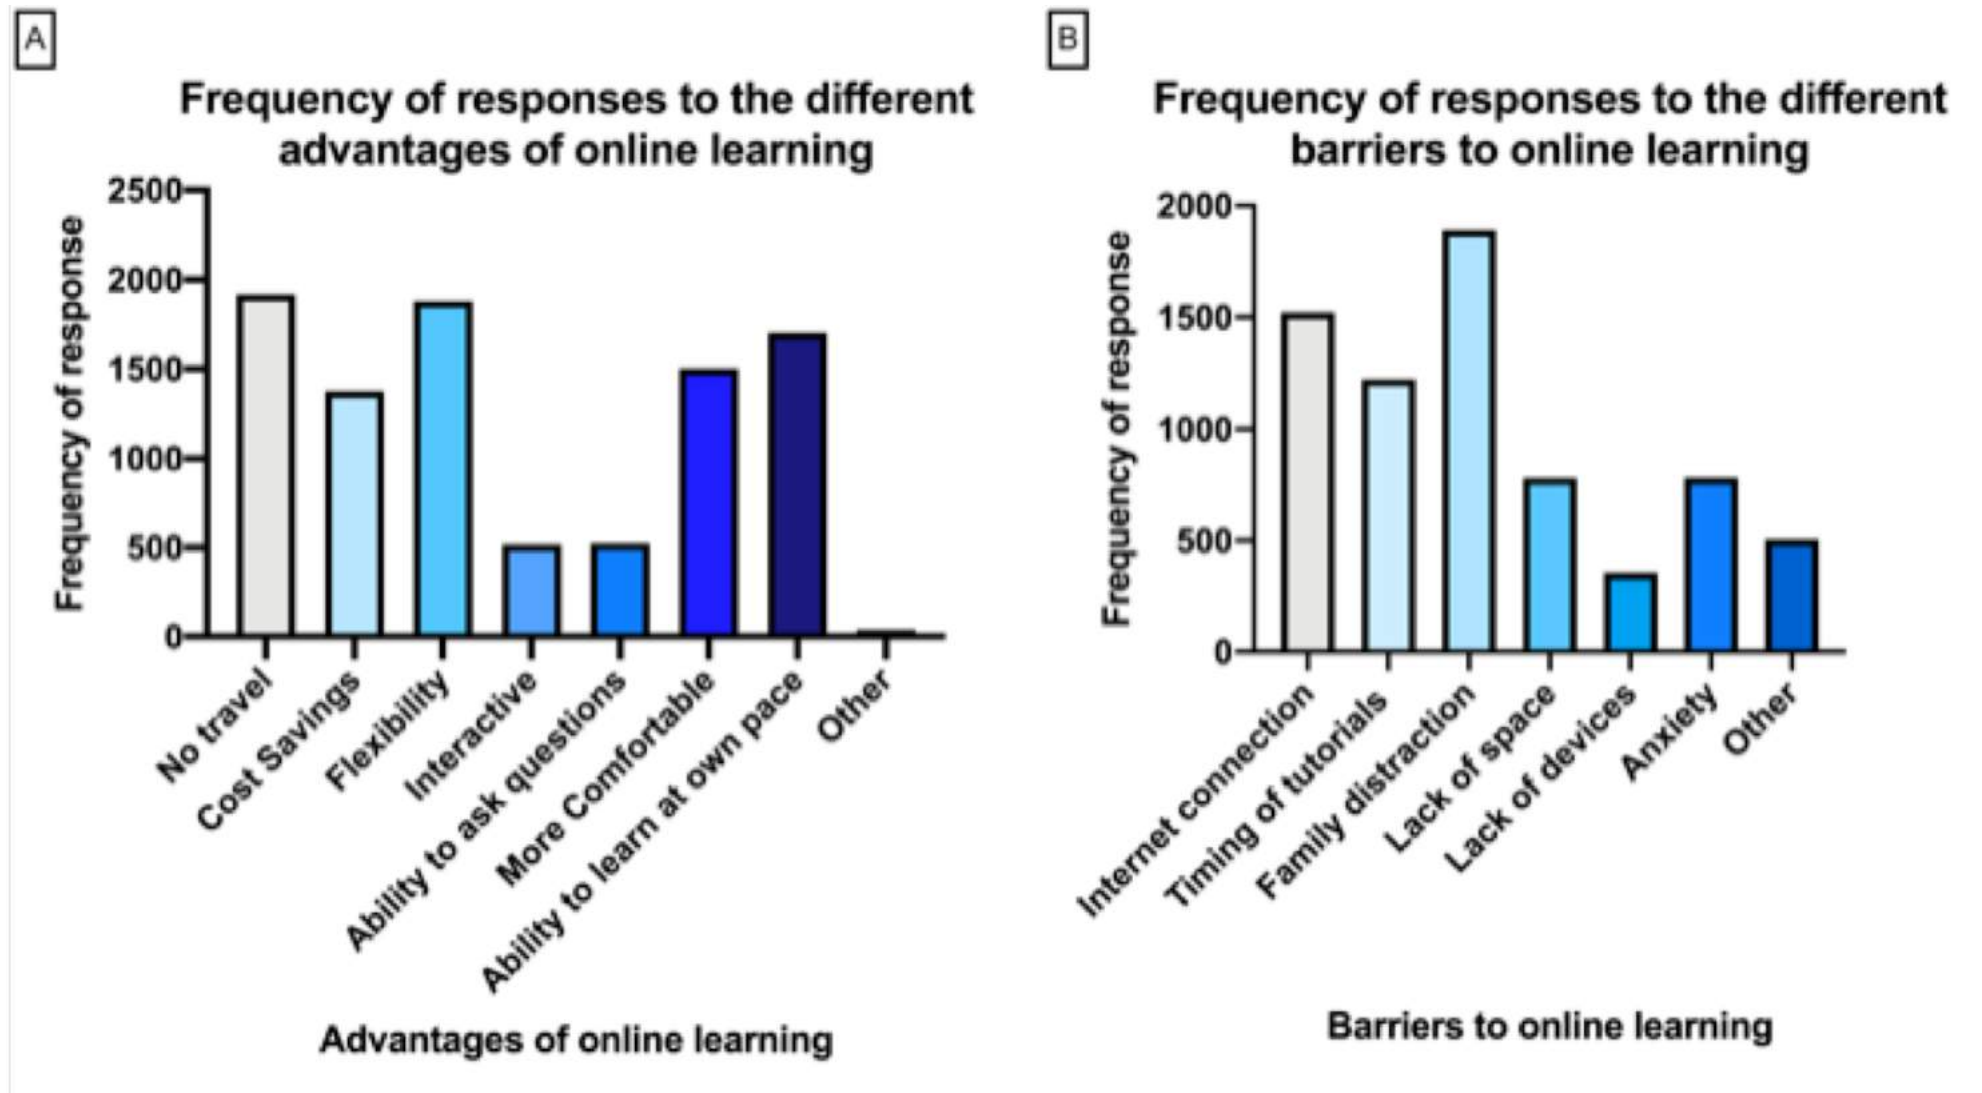

**Figure 3.** A bar chart outlining the advantages of and barriers to online learning. **A-** Students were provided with a list of potential ways in which online learning was advantageous and they were asked to select all which applied to them. They were also given the option to input their own statements (n=2721). **B-** Students were provided with a list of potential barriers to the benefits they may receive from online learning and they were asked to select all which applied to them. They were also given the option to input their own statements (n=2721).



1  
2  
3  
4  
5  
6  
7  
8  
9  
10  
11  
12  
13  
14  
15  
16  
17  
18  
19  
20  
21  
22  
23  
24  
25  
26  
27  
28  
29  
30  
31  
32  
33  
34  
35  
36  
37  
38  
39  
40  
41  
42  
43  
44  
45  
46  
47  
48  
49  
50  
51  
52  
53  
54  
55  
56  
57  
58  
59  
60

## Appendix

### Appendix I – Online Questionnaire

For peer review only

## Covid-19, Online Learning & Medical Education

Thank you for your interest in completing our short survey investigating the role of online learning in facilitating medical education during the Covid-19 pandemic in the UK. The data collected is **non-identifiable** and will be used for research purposes.

This survey will close on Monday 11th May at 10pm.

Please tick the box to proceed:

I consent to my information being used for research purposes and this is my first time completing this survey.

Survey Code:

### Background

1. Which UK Medical School do you attend?

2. What year are you in?

3. What is your gender?

## Online Learning & Medical Education

4. Prior to the Covid-19 pandemic, which online learning platforms/resources did you engage with? (Please select all which apply)

Video tutorials e.g. Youtube/Osmosis

Live tutorials via Zoom/similar platforms by **Medical School**

Live tutorials via Zoom/similar platforms by **other sources**

Online question banks

Online/Digital Flashcards e.g. Brainscape, Anki

Pre-recorded tutorials via Medical School specific online learning platform

None

Other - please specify

5. Which method of online learning do you find the most effective? Please rank the following methods from 1-5 (1=most effective, 5=least effective)

Video tutorials e.g. Youtube/Osmosis

Live tutorials via Zoom/similar platforms

Online question banks

Online/Digital Flashcards e.g. Brainscape, Anki

Other - please specify:

1  
2  
3  
4 6. Prior to the Covid-19 pandemic, how many hours per week did  
5 you spend on average on online learning?  
6  
7

8   
9

10 7. During the current Covid-19 pandemic, how has your medical  
11 school adapted teaching for your year? (Please select all which  
12 apply)  
13  
14  
15

16  Introduced a new online learning platform with new resources  
17

18  Introduced new resources to an existing online learning platform  
19

20  Delivered live tutorials via Zoom/similar platforms  
21

22  Delivered pre-recorded tutorials  
23

24  Other - please specify:  
25  
26

27   
28  
29  
30  
31  
32

33 8. Are these online teaching sessions interactive?  
34  
35

36  Yes  
37

38  No  
39

40  Majority are  
41

42  Majority are not  
43  
44  
45  
46

47 8b. What makes your teaching sessions interactive? (Please  
48 select all which apply)  
49  
50  
51

52  Opportunity to interact via chat box  
53

54  Opportunity to interact via speech  
55

56  Live quiz  
57  
58  
59  
60

Other - please specify:

9. Does the online learning follow a pre-set curriculum, or is it based on student requests?

- Pre-set curriculum
- Student requests
- Combination of both

10. During the current Covid-19 pandemic, how many hours per week do you spend on average on online learning?

### Student Perceptions of Online Learning

11. Please rank the following statements on your experience of online learning from 1-5 (1=Strongly disagree, 5 = Strongly agree)

0                      1                      2                      3                      4                      5

The teaching is often stimulating

I find it easy to engage in the lesson

I feel able to ask the questions I want

I enjoy the online teaching

1  
2  
3  
4  
5 I would like the online teaching to be more interactive  
6  
7

8  

9  
10  
11  
12 I feel that online teaching is as effective as face-face teaching  
13  
14

15  

16  
17  
18  
19 I prefer online teaching to face-face teaching  
20  
21

22  

23  
24  
25  
26 The teachers are well prepared for the teaching sessions  
27  
28

29  

30  
31  
32  
33 I feel I am being well prepared for my profession  
34  
35

36  

37  
38  
39  
40 My internet connection can be problematic  
41  
42

43  

44  
45  
46 12. What aspects of online learning do you enjoy? (Please select  
47 all which apply)  
48  
49

50  
51  No travel

Ability to ask questions

52  
53  Cost savings

More comfortable

54  
55  Interactive

Ability to learn at own pace  
56  
57  
58  
59  
60

Flexibility

Other - please specify:

13. What do you feel are the barriers to online learning? (Please select all which apply)

Internet connection

Lack of space

Timing of tutorials

Lack of devices

Family distractions

Anxiety

Other - please specify:

### Role of Online Learning in Clinical Teaching

14a. Do you feel online learning has successfully replaced the clinical teaching you receive from direct patient contact?

Yes  
 No  
 Yes, to some extent  
 N/A

14b. Do you feel able to learn practical clinical skills through online learning?

Yes  
 No  
 Yes, to some extent  
 N/A

15. Have your examinations been affected by Covid-19?

Yes

No

N/A

1  
2  
3  
4 15b. How have your written examinations been affected?  
5  
6

- 7 ✓  
8 Written exams will take place remotely online  
9 Written exams have been postponed  
10 Written exams have been cancelled  
11 N/A

12  
13 15c. How have your practical examinations been affected?  
14

- 15 ✓  
16 Practical exams will take place with modifications (e.g. virtual patients)  
17 Practical exams have been postponed  
18 Practical exams have been cancelled  
19 N/A  
20  
21  
22  
23  
24  
25  
26  
27  
28  
29  
30  
31  
32  
33  
34  
35  
36  
37  
38  
39  
40  
41  
42  
43  
44  
45  
46  
47  
48  
49  
50  
51  
52  
53  
54  
55  
56  
57  
58  
59  
60



STROBE Statement—Checklist of items that should be included in reports of *cohort studies*

|                              | Item No | Recommendation                                                                                                                                                                                                                                                                                                         | Page No |
|------------------------------|---------|------------------------------------------------------------------------------------------------------------------------------------------------------------------------------------------------------------------------------------------------------------------------------------------------------------------------|---------|
| <b>Title and abstract</b>    | 1       | (a) Indicate the study's design with a commonly used term in the title or the abstract                                                                                                                                                                                                                                 | 1       |
|                              |         | (b) Provide in the abstract an informative and balanced summary of what was done and what was found                                                                                                                                                                                                                    | 2       |
| <b>Introduction</b>          |         |                                                                                                                                                                                                                                                                                                                        |         |
| Background/rationale         | 2       | Explain the scientific background and rationale for the investigation being reported                                                                                                                                                                                                                                   | 4       |
| Objectives                   | 3       | State specific objectives, including any prespecified hypotheses                                                                                                                                                                                                                                                       | 5       |
| <b>Methods</b>               |         |                                                                                                                                                                                                                                                                                                                        |         |
| Study design                 | 4       | Present key elements of study design early in the paper                                                                                                                                                                                                                                                                | 6       |
| Setting                      | 5       | Describe the setting, locations, and relevant dates, including periods of recruitment, exposure, follow-up, and data collection                                                                                                                                                                                        | 6       |
| Participants                 | 6       | (a) Give the eligibility criteria, and the sources and methods of selection of participants. Describe methods of follow-up<br>(b) For matched studies, give matching criteria and number of exposed and unexposed                                                                                                      | 6       |
| Variables                    | 7       | Clearly define all outcomes, exposures, predictors, potential confounders, and effect modifiers. Give diagnostic criteria, if applicable                                                                                                                                                                               | 6       |
| Data sources/<br>measurement | 8*      | For each variable of interest, give sources of data and details of methods of assessment (measurement). Describe comparability of assessment methods if there is more than one group                                                                                                                                   | 6       |
| Bias                         | 9       | Describe any efforts to address potential sources of bias                                                                                                                                                                                                                                                              | 6-7     |
| Study size                   | 10      | Explain how the study size was arrived at                                                                                                                                                                                                                                                                              | 6       |
| Quantitative variables       | 11      | Explain how quantitative variables were handled in the analyses. If applicable, describe which groupings were chosen and why                                                                                                                                                                                           | 7       |
| Statistical methods          | 12      | (a) Describe all statistical methods, including those used to control for confounding<br>(b) Describe any methods used to examine subgroups and interactions<br>(c) Explain how missing data were addressed<br>(d) If applicable, explain how loss to follow-up was addressed<br>(e) Describe any sensitivity analyses | 7       |
| <b>Results</b>               |         |                                                                                                                                                                                                                                                                                                                        |         |
| Participants                 | 13*     | (a) Report numbers of individuals at each stage of study—eg numbers potentially eligible, examined for eligibility, confirmed eligible, included in the study, completing follow-up, and analysed<br>(b) Give reasons for non-participation at each stage<br>(c) Consider use of a flow diagram                        | 8-9     |
| Descriptive data             | 14*     | (a) Give characteristics of study participants (eg demographic, clinical, social) and information on exposures and potential confounders<br>(b) Indicate number of participants with missing data for each variable of interest<br>(c) Summarise follow-up time (eg, average and total amount)                         | 8-9     |
| Outcome data                 | 15*     | Report numbers of outcome events or summary measures over time                                                                                                                                                                                                                                                         | 8-12    |

|    |                          |    |                                                                                                                                                                                                              |       |
|----|--------------------------|----|--------------------------------------------------------------------------------------------------------------------------------------------------------------------------------------------------------------|-------|
| 1  | Main results             | 16 | (a) Give unadjusted estimates and, if applicable, confounder-adjusted estimates and their precision (eg, 95% confidence interval). Make clear which confounders were adjusted for and why they were included | 8-12  |
| 2  |                          |    | (b) Report category boundaries when continuous variables were categorized                                                                                                                                    |       |
| 3  |                          |    | (c) If relevant, consider translating estimates of relative risk into absolute risk for a meaningful time period                                                                                             |       |
| 4  |                          |    |                                                                                                                                                                                                              |       |
| 5  |                          |    |                                                                                                                                                                                                              |       |
| 6  |                          |    |                                                                                                                                                                                                              |       |
| 7  |                          |    |                                                                                                                                                                                                              |       |
| 8  |                          |    |                                                                                                                                                                                                              |       |
| 9  | Other analyses           | 17 | Report other analyses done—eg analyses of subgroups and interactions, and sensitivity analyses                                                                                                               | 8-12  |
| 10 |                          |    |                                                                                                                                                                                                              |       |
| 11 | <b>Discussion</b>        |    |                                                                                                                                                                                                              |       |
| 12 |                          |    |                                                                                                                                                                                                              |       |
| 13 | Key results              | 18 | Summarise key results with reference to study objectives                                                                                                                                                     | 13-16 |
| 14 |                          |    |                                                                                                                                                                                                              |       |
| 15 | Limitations              | 19 | Discuss limitations of the study, taking into account sources of potential bias or imprecision. Discuss both direction and magnitude of any potential bias                                                   | 16    |
| 16 |                          |    |                                                                                                                                                                                                              |       |
| 17 | Interpretation           | 20 | Give a cautious overall interpretation of results considering objectives, limitations, multiplicity of analyses, results from similar studies, and other relevant evidence                                   | 13-16 |
| 18 |                          |    |                                                                                                                                                                                                              |       |
| 19 |                          |    |                                                                                                                                                                                                              |       |
| 20 | Generalisability         | 21 | Discuss the generalisability (external validity) of the study results                                                                                                                                        | 13-16 |
| 21 |                          |    |                                                                                                                                                                                                              |       |
| 22 | <b>Other information</b> |    |                                                                                                                                                                                                              |       |
| 23 |                          |    |                                                                                                                                                                                                              |       |
| 24 | Funding                  | 22 | Give the source of funding and the role of the funders for the present study and, if applicable, for the original study on which the present article is based                                                | 19    |
| 25 |                          |    |                                                                                                                                                                                                              |       |

\*Give information separately for exposed and unexposed groups.

**Note:** An Explanation and Elaboration article discusses each checklist item and gives methodological background and published examples of transparent reporting. The STROBE checklist is best used in conjunction with this article (freely available on the Web sites of PLoS Medicine at <http://www.plosmedicine.org/>, Annals of Internal Medicine at <http://www.annals.org/>, and Epidemiology at <http://www.epidem.com/>). Information on the STROBE Initiative is available at <http://www.strobe-statement.org>.

# BMJ Open

## Perceptions of Medical Students Towards Online Teaching During the COVID-19 Pandemic: a national cross-sectional survey of 2721 UK medical students

|                                 |                                                                                                                                                                                                                                                                                                                                                                                                                          |
|---------------------------------|--------------------------------------------------------------------------------------------------------------------------------------------------------------------------------------------------------------------------------------------------------------------------------------------------------------------------------------------------------------------------------------------------------------------------|
| Journal:                        | <i>BMJ Open</i>                                                                                                                                                                                                                                                                                                                                                                                                          |
| Manuscript ID                   | bmjopen-2020-042378.R1                                                                                                                                                                                                                                                                                                                                                                                                   |
| Article Type:                   | Original research                                                                                                                                                                                                                                                                                                                                                                                                        |
| Date Submitted by the Author:   | 10-Sep-2020                                                                                                                                                                                                                                                                                                                                                                                                              |
| Complete List of Authors:       | Dost, Samiullah; Guy's and St Thomas' Hospitals NHS Trust<br>Hossain, Aleena; Imperial College of Science Technology and Medicine, Faculty of Medicine<br>Shehab, Mai; King's College London School of Medicine, Guy's Campus<br>Abdelwahed, Aida; Imperial College of Science Technology and Medicine, Faculty of Medicine<br>Al-Nusair, Lana; Imperial College of Science Technology and Medicine, Faculty of Medicine |
| <b>Primary Subject Heading</b>: | Medical education and training                                                                                                                                                                                                                                                                                                                                                                                           |
| Secondary Subject Heading:      | Medical education and training, Infectious diseases, Health services research, Public health                                                                                                                                                                                                                                                                                                                             |
| Keywords:                       | MEDICAL EDUCATION & TRAINING, World Wide Web technology < BIOTECHNOLOGY & BIOINFORMATICS, Telemedicine < BIOTECHNOLOGY & BIOINFORMATICS, Information technology < BIOTECHNOLOGY & BIOINFORMATICS, EDUCATION & TRAINING (see Medical Education & Training), PUBLIC HEALTH                                                                                                                                                 |
|                                 |                                                                                                                                                                                                                                                                                                                                                                                                                          |

SCHOLARONE™  
Manuscripts



I, the Submitting Author has the right to grant and does grant on behalf of all authors of the Work (as defined in the below author licence), an exclusive licence and/or a non-exclusive licence for contributions from authors who are: i) UK Crown employees; ii) where BMJ has agreed a CC-BY licence shall apply, and/or iii) in accordance with the terms applicable for US Federal Government officers or employees acting as part of their official duties; on a worldwide, perpetual, irrevocable, royalty-free basis to BMJ Publishing Group Ltd ("BMJ") its licensees and where the relevant Journal is co-owned by BMJ to the co-owners of the Journal, to publish the Work in this journal and any other BMJ products and to exploit all rights, as set out in our [licence](#).

The Submitting Author accepts and understands that any supply made under these terms is made by BMJ to the Submitting Author unless you are acting as an employee on behalf of your employer or a postgraduate student of an affiliated institution which is paying any applicable article publishing charge ("APC") for Open Access articles. Where the Submitting Author wishes to make the Work available on an Open Access basis (and intends to pay the relevant APC), the terms of reuse of such Open Access shall be governed by a Creative Commons licence – details of these licences and which [Creative Commons](#) licence will apply to this Work are set out in our licence referred to above.

Other than as permitted in any relevant BMJ Author's Self Archiving Policies, I confirm this Work has not been accepted for publication elsewhere, is not being considered for publication elsewhere and does not duplicate material already published. I confirm all authors consent to publication of this Work and authorise the granting of this licence.

1  
2  
3 **Perceptions of Medical Students Towards Online Teaching During the COVID-19 Pandemic: a**  
4 **national cross-sectional survey of 2721 UK medical students**  
5  
6

7 Samiullah Dost<sup>1\*</sup>, Aleena Hossain<sup>2\*†</sup>, Mai Shehab<sup>3</sup>, Aida Abdelwahed<sup>2</sup>, and Lana Al-Nusair<sup>2</sup>  
8  
9

- 10  
11  
12 1. *Guys and St Thomas's Hospital, London, SE11 4TX, Academic Foundation Doctor*  
13  
14 2. *Imperial College London, Sir Alexander Fleming, SW7 2AZ, Medical Student*  
15  
16 3. *King's College London, Guy's Campus, London, SE1 1UL, Medical Student*  
17  
18  
19

20  
21 \*SD and AH contributed equally to this study as joint first authors  
22  
23

24  
25 **†Contact address for corresponding author:**  
26

27 Aleena Hossain  
28

29 Imperial College London, Sir Alexander Fleming, SW7 2AZ  
30

31 [aleena.hossain16@imperial.ac.uk](mailto:aleena.hossain16@imperial.ac.uk)  
32  
33

34  
35 **Word Count:** 3999  
36  
37

38  
39 **KEYWORDS:** Medical Education & Training; Telemedicine; Information Technology; World Wide Web  
40  
41 Technology; Education & Training; Public Health  
42  
43  
44  
45  
46  
47  
48  
49  
50  
51  
52  
53  
54  
55  
56  
57  
58  
59  
60

1  
2  
3 1 **Abstract**  
4  
5 2  
6  
7 3

8 **Objectives** To investigate perceptions of medical students on the role of online teaching in facilitating  
9  
10 medical education during the COVID-19 pandemic  
11

12 5 **Design** Cross-sectional, online national survey  
13

14 6 **Setting** Responses collected online from 4<sup>th</sup> May to 11<sup>th</sup> May 2020 across 40 UK medical schools  
15

16 7 **Participants** Medical students across all years from UK-registered medical schools  
17

18 8 **Main outcome measures** The uses, experiences, perceived benefits and barriers of online teaching  
19  
20 during the COVID-19 pandemic.  
21  
22

23 10 **Results** 2721 medical students across 39 medical schools responded. Medical schools adapted to the  
24  
25 pandemic in different ways. The changes included the development of new distance-learning  
26  
27 platforms on which content was released, remote delivery of lectures using platforms and the use of  
28  
29 question banks and other online active recall resources. A significant difference was found between  
30  
31 time spent on online platforms before and during COVID-19, with 7.35% students before vs. 23.56%  
32  
33 students during the pandemic spending >15 hours per week ( $p<0.05$ ). The greatest perceived benefits  
34  
35 of online teaching platforms included their flexibility. Whereas the commonly perceived barriers to  
36  
37 utilising online teaching platforms included family distraction (26.76%) and poor internet connection  
38  
39 (21.53%).  
40  
41  
42

43 19 **Conclusions** Online teaching has enabled the continuation of medical education during these  
44  
45 unprecedented times. Moving forward from this pandemic, in order to maximise the benefits of both  
46  
47 face-to-face and online teaching and to improve the efficacy of medical education in the future, we  
48  
49 suggest medical schools resort to teaching formats such as team-based/problem-based learning. This  
50  
51 utilises online teaching platforms allowing students to digest information in their own time but also  
52  
53 allows students to then constructively discuss this material with peers. It has also been shown to be  
54  
55 effective in terms of achieving learning outcomes. Beyond COVID-19, we anticipate further  
56  
57  
58  
59  
60

1  
2  
3 26 incorporation of online teaching methods within traditional medical education. This may accompany  
4  
5 27 the observed shift in medical practice towards virtual consultations.  
6  
7  
8 28  
9

10 29 **Article Summary**  
11  
12 30  
13  
14

15 **Strengths & Limitations**

- 16 • The COVID-19 pandemic has undoubtedly impacted the delivery of medical education  
17 with a sudden shift towards online teaching platforms; to date, this is the first study  
18 investigating the perceptions of medical students on these changes.
- 19 • This study is strengthened by its collection of responses from a large national cohort of  
20 medical students from 39 out of 40 UK medical schools.
- 21 • The survey extensively explored the benefits of and barriers to online teaching methods  
22 with the potential to provide medical schools nationally with a direction for development  
23 of resources.
- 24 • Survey responses may have been subject to recall bias, and limited by timing of the study  
25 coinciding with the examination season where remote learning platforms may often be  
26 resorted to.  
27  
28

29 31  
30  
31  
32  
33  
34  
35  
36  
37  
38  
39  
40  
41  
42  
43  
44  
45  
46  
47  
48  
49  
50  
51  
52  
53  
54  
55  
56  
57  
58  
59  
60

review only

## 32 INTRODUCTION

33  
34 Since the first case of coronavirus disease 2019 (COVID-19) in the United Kingdom (UK)(1), the World  
35 Health Organisation (WHO) has declared the COVID-19 outbreak as a global pandemic(2). The  
36 nationwide lockdown restrictions to control the spread of disease and “flatten the curve” have  
37 impacted all aspects of life(3–5); inevitably, medical education has also been affected, with the halting  
38 of lectures, clinical placements, and key examinations(6,7). Such measures have resulted in a sudden  
39 shift in teaching methods towards online teaching. Online teaching has played a key role in medical  
40 education over recent years(8–10), demonstrated several benefits in enhancing student learning(11).  
41 A recent systematic review suggested that offline and online teaching are equivalent in terms of  
42 outcomes of examinations(12). Key drawbacks have also been highlighted, including time constraints  
43 to implement effective online teaching (8).

44  
45 The unprecedented COVID-19 pandemic has caused a sudden shift towards the exclusive adoption of  
46 online teaching, forming the primary source of medical education and enabling students to continue  
47 to learn remotely(13). Teaching sessions have covered key clinical conditions, case studies and  
48 examination questions via live-streamed tutorials through platforms such as Zoom(6), shown to have  
49 high levels of engagement(14). With around 19.6% of the UK medical student demographic consisting  
50 of international students(15), many of whom have returned home, this allows individuals to access  
51 teaching regardless of location(6). Nevertheless, learning relying on the internet needs to be tailored  
52 towards different learning styles to enable it to be impactful and effective(13). However, whilst the  
53 benefits to pre-clinical years of blended learning has been shown, for example in anatomical  
54 teaching(16) and especially in a generation accustomed to using YouTube(17), there is limited  
55 understanding of the impact of exclusive online teaching and its use in clinical years. Concerns have  
56 been raised regarding the quality of resources produced during the pandemic due to time constraints,  
57 particularly as these resources aim to compensate for lack of exposure(18). Indeed, a recent national



1  
2  
3 58 Twitter discussion, involving representatives from the General Medical Council (GMC), NHS England  
4  
5 59 and WHO, found that a key concern amongst students was that remote learning impacted their ability  
6  
7 60 to develop clinical competence(19). This also highlighted the potential role of the professional use of  
8  
9 61 social media in facilitating medical education, as shown in surgical training(20).  
10  
11  
12 62

13  
14 63 In the coming months, as lockdown restrictions ease, the need for social distancing will continue and  
15  
16 64 the possibility of medical students acting as vectors of COVID-19(21,22), as seen in the SARS epidemic  
17  
18 65 in Hong Kong(23), remains. Moreover, PPE shortages may form potential barriers to patient  
19  
20 66 interaction(24). Therefore, it is likely that e-learning and telemedicine will continue to form vital  
21  
22 67 sources of medical education. Many authors have suggested that digital health platforms for both  
23  
24 68 patients and students will remain an integral part of care even after the COVID-19 pandemic(25). Thus,  
25  
26 69 having a greater understanding of the perceived advantages and drawbacks will allow medical schools  
27  
28 70 to improve their delivery of online teaching. The COVID-19 pandemic has put us in a unique position  
29  
30 71 to evaluate the significance of online teaching platforms in medical education. Whilst many students  
31  
32 72 have acknowledged the impact of COVID-19 on their education(6,21) and explored their role during  
33  
34 73 the pandemic(26,27), to date no study has investigated the outlook of medical students on the effect  
35  
36 74 of these changes. Therefore, we aimed to investigate their perceptions on the role of online teaching  
37  
38 75 in facilitating their education during the COVID-19 pandemic. Improving our understanding of this  
39  
40 76 could help develop medical school curricula in the future.  
41  
42  
43  
44  
45  
46  
47  
48  
49  
50  
51  
52  
53  
54  
55  
56  
57  
58  
59  
60

## 78 **METHODOLOGY**

### 79 80 **Questionnaire design and distribution**

81 This was a cross-sectional study conducted on a national level via an online survey. A 20-item  
82 questionnaire was devised following a literature search on current online teaching methods and the  
83 effects of COVID-19 on medical education in the UK (Appendix I). Questions exploring the experiences  
84 of online teaching were based on sections I-IV of the Dundee Ready Education Environment Measure  
85 (DREEM)(28), a validated questionnaire designed to measure the educational environment of medical  
86 schools and healthcare professionals(29). These were 5-point Likert-type questions, ranging from  
87 strongly disagree to strongly agree. The remaining items in the questionnaire comprised a mixture of  
88 question styles. Certain questions were conditional. Open-ended text responses were also collected  
89 and underwent thematic analysis whereby responses were categorised. The question items were  
90 initially drafted and informally discussed with a group of medical students before undergoing a careful  
91 review and editing process. The final questions explored the following three themes:

- 92 1. General demographics
- 93 2. The use and experience of online teaching during the COVID-19 pandemic
- 94 3. Perceived benefits and barriers of online teaching

95  
96 The survey was created using Qualtrics, an online survey software (Version XM, 2019, Provo, UT(30)),  
97 and distributed by medical students recruited nationally via social media, with an interest in sharing a  
98 national survey, in order to maximise outreach to all 40 registered UK medical schools(31). The survey  
99 was accessible via an anonymous link and open for a one-week period (04/05/20–11/05/20).

100

### 101 **Participants**

102 All 42,190 undergraduate and graduate entry medical students(32) across all years (years 1-5 and  
103 intercalated year) from 40 registered UK medical schools(31) were eligible to participate.

104

1  
2  
3 105 **Patient and Public Involvement**  
4

5 106  
6

7 107 As this study focused on medical students, patients or the general public were not involved in the  
8  
9 108 study design. However, medical students were involved with the piloting of the survey as well as its  
10  
11 109 distribution across medical schools.  
12  
13

14 110  
15

16 111 **Participant consent and ethical considerations**  
17

18 112 Participation was voluntary, and participants were informed prior to starting the survey that all data  
19  
20 113 collected was non-identifiable and would only be used for research purposes. A mandatory selection  
21  
22 114 box consenting to participation and confirming that that this was the first time completing this survey  
23  
24 115 was included at the beginning of the survey, ensuring a 100% consent rate and preventing multiple  
25  
26 116 responses. Ethical approval was requested from Imperial College London and was deemed not to be  
27  
28 117 required as all data was anonymised, with informed consent taken from all participants.  
29  
30  
31

32 118  
33

34 119 **Data analysis**  
35

36 120 Data was exported from Qualtrics to Microsoft Excel (Excel version 16.29, 2019). Qualtrics and  
37  
38 121 GraphPad Prism (Prism version 8.2.1, 2019) were both used to generate graphs and calculate  
39  
40 122 descriptive statistics for the survey responses to explore patterns in responses. Multiple responses  
41  
42 123 were accounted for by identifying unique IP addresses.  
43  
44  
45

46 124  
47

48 125 Wilcoxon test was used to compare hours of online teaching usage before and during COVID-19  
49  
50 126 overall, whilst Mann-Whitney U test was utilised in a sub-group analysis comparing usage between  
51  
52 127 pre-clinical and clinical students. These were conducted following the Shapiro-Wilk and Kolmogorov-  
53  
54 128 Smirnov normality tests which found the data set to be non-gaussian in distribution. *P*-values <0.05  
55  
56 129 were considered statistically significant.  
57  
58  
59  
60

130 **RESULTS**

131

132 **Cohort demographics**

133 Of the 2721 responses collected, 68.06% (n=1852) of respondents were female, 31.53% (n=858) were  
 134 male, and 0.40% (n=11) identified as other, contrasting against the population of UK medical students,  
 135 which comprises of 55% females and 45% males(32). Responses were collected from 39 medical  
 136 schools across the UK, from medical students across all years (Table 1). Due to the inability to track  
 137 the survey distribution, it was not possible to calculate a response rate. However, non-response bias  
 138 was minimised by ensuring the survey was shared by a variety of medical students via a range of  
 139 platforms.

**Table 1.** A table outlining the demographics (gender, university, and year of medical school) of students responding to the survey (n=2721).

| Demographic                            |                                                                 | Proportion of students, % (n) |
|----------------------------------------|-----------------------------------------------------------------|-------------------------------|
| Gender                                 | Male                                                            | 31.53 (858)                   |
|                                        | Female                                                          | 68.06 (1852)                  |
|                                        | Other                                                           | 0.40 (11)                     |
| University                             | University of Aberdeen School of Medicine and Dentistry         | 1.76 (48)                     |
|                                        | Anglia Ruskin University School of Medicine                     | 2.21 (60)                     |
|                                        | Aston University Medical School                                 | 0.07 (2)                      |
|                                        | Barts and The London School of Medicine and Dentistry           | 6.39 (174)                    |
|                                        | University of Birmingham College of Medical and Dental Sciences | 1.76 (48)                     |
|                                        | Brighton and Sussex Medical School                              | 0.44 (12)                     |
|                                        | University of Bristol Medical School                            | 3.20 (87)                     |
|                                        | University of Buckingham Medical School                         | 0.77 (21)                     |
|                                        | University of Cambridge School of Clinical Medicine             | 1.29 (35)                     |
|                                        | Cardiff University School of Medicine                           | 9.22 (251)                    |
|                                        | University of Dundee School of Medicine                         | 0.40 (11)                     |
|                                        | The University of Edinburgh Medical School                      | 0.44 (12)                     |
|                                        | University of Exeter Medical School                             | 2.06 (56)                     |
|                                        | University of Glasgow School of Medicine                        | 0.70 (19)                     |
|                                        | Hull York Medical School                                        | 3.86 (105)                    |
|                                        | Imperial College London Faculty of Medicine                     | 3.93 (107)                    |
|                                        | Keele University School of Medicine                             | 0.85 (23)                     |
|                                        | Kent and Medway Medical School                                  | 0.04 (1)                      |
|                                        | King's College London GKT School of Medical Education           | 10.11 (275)                   |
| Lancaster University Medical School    | 0.15 (4)                                                        |                               |
| University of Leeds School of Medicine | 4.96 (135)                                                      |                               |

140

|    |      |                                                                 |             |
|----|------|-----------------------------------------------------------------|-------------|
| 1  |      |                                                                 |             |
| 2  |      |                                                                 |             |
| 3  |      |                                                                 |             |
| 4  |      | University of Leicester Medical School                          | 2.87 (78)   |
| 5  |      | University of Liverpool School of Medicine                      | 8.38 (228)  |
| 6  |      | University of Manchester Medical School                         | 4.52 (123)  |
| 7  |      | Newcastle University School of Medical Education                | 3.34 (91)   |
| 8  |      | Norwich Medical School                                          | 7.02 (191)  |
| 9  |      | University of Nottingham School of Medicine                     | 3.31 (90)   |
| 10 |      | University of Nottingham - Lincoln Medical School               | 0.07 (2)    |
| 11 |      | University of Oxford Medical Sciences Division                  | 2.24 (61)   |
| 12 |      | Plymouth University Peninsula Schools of Medicine and Dentistry | 0.55 (15)   |
| 13 |      | Queen's University Belfast School of Medicine                   | 0.92 (25)   |
| 14 |      | University of Sheffield Medical School                          | 0.99 (27)   |
| 15 |      | University of Southampton School of Medicine                    | 1.98 (54)   |
| 16 |      | University of St Andrews School of Medicine                     | 0.33 (9)    |
| 17 |      | St George's, University of London                               | 2.46 (67)   |
| 18 |      | University of Sunderland School of Medicine                     | 0.00 (0)    |
| 19 |      | Swansea University Medical School                               | 0.11 (3)    |
| 20 |      | University of Central Lancashire School of Medicine             | 1.73 (47)   |
| 21 |      | University College London Medical School                        | 2.46 (67)   |
| 22 |      | University of Warwick Medical School                            | 2.09 (57)   |
| 23 |      |                                                                 |             |
| 24 | Year | Pre-clinical Year 1                                             | 23.19 (631) |
| 25 |      | Pre-clinical Year 2                                             | 19.85 (540) |
| 26 |      | Year 3                                                          | 27.20 (740) |
| 27 |      | Penultimate Clinical Year                                       | 20.62 (561) |
| 28 |      | Final Clinical Year                                             | 4.52 (123)  |
| 29 |      | Intercalating                                                   | 4.63 (126)  |

141

142

143 **Student engagement with online teaching platforms**

144

145 Prior to the pandemic, students spent an average of 4-6 hours per week using online teaching

146 platforms. Students used a combination of video tutorials (27.71%), online question banks (26.18%),

147 pre-recorded tutorials via their respective medical schools (20.96%) and online flashcards (15.99%).

148 4.46% of students utilised live tutorials via online platforms from their medical school, while 1.79%

149 used live tutorials from other sources (Figure 1). Other resources included the use of Anatomy TV,

150 online notes such as Pulsenotes or TeachMeAnatomy, Acland's Anatomy videos, revision websites e.g.

151 OSCE Stop and Zero To Finals, NICE guidelines, online textbooks and UpToDate, and BMJ Best Practice.

152

153 Students then ranked the effectiveness of online teaching platforms with 1 being most effective and

154 5 being least effective. Video tutorials e.g. YouTube/Osmosis appeared to be the most effective,

155 followed by online question banks, and live tutorials, whilst students commented using a variety of

156 other sources. However, following sub-analysis and exclusion of intercalating students, unlike pre-

1  
2  
3 157 clinical students, clinical students found live tutorials to be the most effective, although rankings for  
4  
5 158 the remaining platforms were similar.

6  
7 159  
8  
9  
10 160 During the pandemic, students spent an average of 7-10 hours using online teaching platforms,  
11  
12 161 compared to 4-6 hours prior to the pandemic. The difference in hours prior to and during the COVID-  
13  
14 162 19 pandemic were found to be significant ( $p<0.05$ ). Similar numbers of students spent <1 hour on  
15  
16 163 online teaching platforms before and during the pandemic. However, there was an increase in  
17  
18 164 numbers of students spending longer periods of time on online teaching platforms, for example 7.35%  
19  
20 165 (n=200) vs. 19.70% (n=641) of students spent >15 hours on online teaching platforms before and  
21  
22 166 during the pandemic (Figure 2A). Following sub-analysis, before the pandemic, clinical and pre-clinical  
23  
24 167 students spent similar times on online teaching (Figure 2Bi), whereas during the pandemic differences  
25  
26 168 in periods were found to be significant ( $p<0.001$ ) (Figure 2Bii), with a greater proportion of pre-clinical  
27  
28 169 students spending >15 hours (28.69% vs. 20.01%). 57.28% of students reported that they were now  
29  
30 170 taking examinations remotely; the remaining reported having postponed or cancelled examinations.

31  
32  
33  
34 171

### 35 36 172 **Medical school adaptations to COVID-19**

37  
38 173  
39  
40  
41 174 Medical schools adapted to the pandemic in a combination of ways with 28.48% of students reporting  
42  
43 175 their medical school to adapting to remote learning through the delivery of live tutorials via online  
44  
45 176 platforms. Moreover, 42.19% of students reported that their medical school either introduced new  
46  
47 177 resources to existing learning platforms or created a new online teaching platform with new  
48  
49 178 resources. Other medical schools have either a) not implemented anything as the curriculum had  
50  
51 179 already been covered, or b) delayed teaching with the introduction of a question bank.

52  
53  
54 180

55  
56  
57 181 The online teaching provided as an alternative by the medical schools followed a pre-set curriculum  
58  
59 182 for 66.12% (n=1799) of students, was designed following student requests for 3.38% (n=92) of

183 students, or using a combination of both for 30.50% (n=830) of students. This shows that student  
 184 opinion was considered in the delivery of online teaching.

185  
 186 Furthermore, 59.73% of students found that online teaching sessions have been interactive, with  
 187 students finding the opportunity to interact via the chat box or by directly speaking to the lecturer.  
 188 Some students have also specified that having small group sizes, group discussions, online case  
 189 simulations and quizzes have been useful in increasing their engagement.

190

### 191 **Student perception of online teaching**

192

193 Students ranked their experience of online teaching using a Likert scale with 1 being strongly disagree  
 194 and 5 being strongly agree (Table 2). Students agreed that learning online was engaging, enjoyable  
 195 and allowed room for questions. However, students appeared to want online teaching to be more  
 196 interactive and did not find it as effective as face-to-face teaching.

197

**Table 2.** A table displaying students' perceptions on their experiences of online teaching, ranked on a Likert scale from 1-5, where 1=strongly disagree and 5=strongly agree. Likert scores have been shown as mean  $\pm$  standard deviation ( $\pm$ SD)

| Statement                                                            | Mean | $\pm$ SD |
|----------------------------------------------------------------------|------|----------|
| The teaching is often stimulating                                    | 2.75 | 1.18     |
| I find it easy to engage in the lesson                               | 2.55 | 1.30     |
| I feel able to ask the questions I want                              | 2.70 | 1.53     |
| I enjoy the online teaching                                          | 2.62 | 1.37     |
| I would like the online teaching to be more interactive              | 3.04 | 1.44     |
| I feel that online teaching is as effective as face-to-face teaching | 1.92 | 1.45     |
| I prefer online teaching to face-to-face teaching                    | 1.69 | 1.48     |
| The teachers are well prepared for the teaching sessions             | 3.36 | 1.42     |
| I feel I am being well prepared for my profession                    | 2.28 | 1.33     |
| My internet connection can be problematic                            | 2.53 | 1.74     |

198

199

200 The main advantages of online teaching appeared to be that it saves students time on travelling  
 201 (19.82%), provides flexibility (19.52%), the ability for students to learn at their own pace (18.63%), it  
 202 is more comfortable (15.84%), and it cuts costs (14.24%) (Figure 3A). Other medical students (n=82)

1  
2  
3 203 also commented that it provides time efficiency, allows more time for students to focus on  
4  
5 204 preparing for clinical placements, reduces anxiety, and being able to be in a different country.  
6  
7  
8 205

9  
10 206 On the other hand, students stated that family distractions (26.76%), internet connection (21.53%),  
11  
12 207 timing of tutorials (17.31%), anxiety (11.08%), and lack of space (11.03%) as barriers to effective online  
13  
14 208 teaching (Figure 3B). Students (n=81) commented on experiencing a lack of motivation, difficulty  
15  
16 209 concentrating and asking questions, and a lack of contact with colleagues as further limitations.  
17  
18  
19 210

### 20 211 **Role of online teaching in clinical teaching**

21 212  
22  
23 213 75.99% (n=1842) of medical students felt that online teaching had not successfully replaced the clinical  
24  
25 214 teaching they received via direct patient contact, with 82.17% (n=1986) feeling they cannot learn  
26  
27 215 practical clinical skills through online teaching. This shows that clinical skills remain a pertinent barrier  
28  
29 216 to online teaching of medical students.  
30  
31  
32  
33  
34 217

### 35 218 **Student perception on effectiveness of online teaching**

36 219  
37  
38 220 Students ranked the effectiveness of online teaching with 1 being most effective and 5 being least  
39  
40 221 effective. Video tutorials e.g. YouTube/Osmosis appeared to be the most effective, followed by online  
41  
42 222 question banks, and live tutorials, whilst students commented using a variety of other sources.  
43  
44  
45  
46  
47  
48  
49  
50  
51  
52  
53  
54  
55  
56  
57  
58  
59  
60



1  
2  
3 223 **DISCUSSION**  
4

5 224  
6

7 225 **Background**  
8

9  
10 226 With the rise of COVID-19, it is unsurprising that many medical institutions have resorted to online  
11  
12 227 education platforms. However, online education has been used preceding this pandemic. Here, we  
13  
14 228 discuss how this pandemic has shaped the use of online teaching currently as well as its application in  
15  
16 229 the future of medical education.  
17

18  
19 230

20  
21 231 **The impact of COVID-19 on uptake of online teaching**  
22

23  
24 232 Our study found a significant difference ( $p<0.05$ ) in the time spent on online teaching platforms before  
25  
26 233 and during the pandemic, with a greater number of hours spent amidst the pandemic, particularly  
27  
28 234 amongst pre-clinical students. This result was expected as the primary source of education and  
29  
30 235 engagement of students with their medical schools was online. This is in addition to the normative  
31  
32 236 use of online teaching resources before the pandemic and forced isolation. This is despite that many  
33  
34 237 students reported the cancellation of clinical examinations and conversion of written examinations  
35  
36 238 into open book, which would arguably reduce student engagement with any learning platform.  
37  
38 239 Indeed, this may have accounted for the greater proportion of pre-clinical students engaging with  
39  
40 240 online teaching for more than 15 hours, than clinical students.  
41

42 242 The development of innovative educational projects has been initiated to enhance remote medical  
43  
44 243 education(19). A rise in external resources and teaching programs such as Osmosis, BiteMedicine,  
45  
46 244 Becoming A Doctor and Sustaining Medical education in a Lockdown Environment (SMILE) has allowed  
47  
48 245 many teaching sessions to be available to medical students across the country. Hence, students may  
49  
50 246 learn from a wider community of professionals. However, the high flow of resources causes a  
51  
52 247 proliferation of choice which may increase burnout rates. Schwartz claimed that this choice overload  
53  
54 248 is due to the failure of universities on fulfilling their education role to their students(33,34). Yet, the  
55  
56 249 increase in demand suggests that students desire this flexible curriculum.  
57  
58  
59  
60

1  
2  
3 251 The accessibility of online material may have contributed to a high absenteeism and increase  
4  
5 252 disengagement in medical schools; limited interaction with lecturers may add to this(35). To tackle  
6  
7 253 this, Evans *et al.* suggested incorporating online Q&A sessions to improve student engagement(13),  
8  
9  
10 254 based on a previous model advising the use of synchronous learning(36). Synchronous learning is  
11  
12 255 defined as a social learning environment alongside answering questions live(37). This active  
13  
14 256 communication between lecturers and students allows ambiguous concepts to be addressed  
15  
16 257 immediately to increase student involvement, creating a more active learning environment. Indeed,  
17  
18 258 our results show that students would like online teaching sessions to be more interactive.  
19  
20  
21 259

### 22 23 260 **Student perception of online teaching**

24  
25 261 Students scored their experiences of online compared to face-to-face teaching to be lower, with an  
26  
27 262 average of 1.69 scored for preference for online teaching, and 2.55 for engagement in lessons (Table  
28  
29 263 2), suggesting most students prefer face-to-face teaching. Furthermore, previous studies utilizing the  
30  
31 264 DREEM survey found higher average scores for educational environments(38–40). The discrepancies  
32  
33 265 found may have been due to students comparing their current experiences to previous face-to-face  
34  
35 266 teaching. However, given that students are currently solely limited to online teaching, responses may  
36  
37 267 not truly reflect the efficacy of online teaching. Nevertheless, as online teaching has become  
38  
39 268 mainstream, it is paramount to analyse its efficacy compared to previous methods for further  
40  
41 269 development.  
42  
43  
44  
45

46 270  
47  
48 271 Furthermore, unlike teaching evaluated by DREEM previously, the current pandemic caused a sudden  
49  
50 272 shift towards the use of online teaching on a large scale, allowing for inconsistencies with  
51  
52 273 underdeveloped medical curricula, many teachers being inadequately prepared and technical  
53  
54 274 difficulties(8). Therefore, the low scores of student experiences may be due to the unexpected,  
55  
56 275 sudden introduction of online teaching. Despite the relatively high score of 3.36 for teacher  
57  
58 276 preparation(38–45), the quality of the sessions delivered may have been impacted by several factors  
59  
60

1  
2  
3 277 such as poor internet connection, family distractions and the timing of the tutorials, as demonstrated  
4  
5 278 by our results. In the future, medical schools must carefully build an infrastructure comprising of  
6  
7 279 technologically versatile lecturers to deliver well-organised, succinct tutorials, games and resources,  
8  
9 280 especially given the lack of awareness of “conscientious online lecture design” amongst medical  
10  
11 281 educators(46).

12  
13  
14 282

15  
16 283 The low score of 2.28 for being “well prepared for my profession” (Table 2), compared to previous  
17  
18 284 studies reporting up to 3.18(39,41,44,45,47), is striking, mirroring concerns that remote or online  
19  
20 285 teaching may compromise the clinical competence and confidence of students(19). The loss of  
21  
22 286 immediate feedback may have contributed to this, as generally students and doctors prefer face-to-  
23  
24 287 face sessions for communication(48) and feedback purposes(49). Nonetheless, it is important to note  
25  
26 288 that students often do not feel completely prepared for their profession(50).

27  
28  
29  
30 289

31  
32 290 Moreover, overall video tutorials (e.g. YouTube or Osmosis), were ranked as the most effective online  
33  
34 291 resources, compared to live tutorials, particularly for pre-clinical students. Reasons for this may  
35  
36 292 include the short, organized and aesthetic nature of pre-recorded videos(51). In comparison, live  
37  
38 293 tutorials tend to be longer, face technical difficulties and are less engaging. Despite these challenges,  
39  
40 294 live tutorials were perceived to be the most effective by clinical students. This may be due to the  
41  
42 295 sessions’ synchronous nature, allowing for real time discussions to occur, reflecting clinical practice.

43  
44  
45  
46 296

47  
48 297 Notably, in this study, distinctions between the different forms of online teaching were not made  
49  
50 298 when investigating students’ perceptions. Rather, it was an evaluation of online teaching as a whole,  
51  
52 299 which may have impacted the results, as teaching modalities are often specific to the topic being  
53  
54 300 taught(46). Furthermore, student preferences may depend on the purpose of engaging with  
55  
56 301 resources, for example for learning new content versus revision(52), or for short-term versus long-  
57  
58 302 term knowledge retention(53).

303

**304 Benefits and barriers of online teaching**

305

306 To students, the main advantages of online teaching are the time and money saved from the lack of  
307 travel, its flexibility and the ability for students to learn at their own pace (Figure 3A). Further benefits  
308 of live online lectures(14) include opportunities for students to anonymously ask and answer  
309 questions, potentially encouraging further engagement from those who would not otherwise  
310 participate in a live lecture, due to the less intimidating environment online(54). However, these  
311 benefits may not be applicable to all forms of online teaching. For example, the limited synchronous  
312 aspects of pre-recorded content may deter students due to the lack of opportunities to interact with  
313 lecturers(55). Also, watching pre-recorded lectures, alongside the possibility of attending face-to-face  
314 lecture, has been shown to negatively correlate with learning success(56).

315

316 The main barriers to online teaching appear to be family distractions, internet connection and the  
317 timing of tutorials (Figure 3B). This may disadvantage students with large families or with limited  
318 internet access. Moreover, the mental health of students, recently shown to be impacted by the  
319 COVID-19 pandemic(57), may be adversely affected as indicated by the free text responses. This may  
320 be, in part, attributed to the lack of interaction with friends and colleagues leading to a rise in anxiety.  
321 Alternatively, with exams being open book and with an unrestricted setting, students may be less  
322 prone to exam anxiety(58). Although, this does not address the family and noise disturbances which  
323 may still affect exam performance.

324

**325 Medical student role during the COVID-19 pandemic**

326

327 On the other hand, medical students are being asked to 'step-up' and join the front-line of doctors  
328 tackling COVID-19(59). As well as the early graduation of UK medical students(60), many universities

1  
2  
3 329 have given their students the opportunity to volunteer. For example, the University of Birmingham  
4  
5 330 has facilitated for over 700 medical students to volunteer in the NHS(27). Although medical schools  
6  
7 331 have halted clinical placements, this opportunity could provide more exposure, undoubtedly  
8  
9 332 impacting the development of medical students. However, for those who are not volunteering due to  
10  
11 333 living with vulnerable family members or having health conditions themselves, this would then put  
12  
13 334 them at a disadvantage as their peers continue to gain clinical exposure.  
14  
15  
16  
17  
18

19 335  
20 336 As lockdown restrictions ease and students slowly return to medical school, clinical placements may  
21 337 incorporate more virtual aspects as healthcare evolves(22). Indeed, new platforms have been  
22 338 developed by the NHS (e.g. NHS NearMe) which have shown that video consultations are better than  
23 339 telephone consultations in reducing medical error and improving patient outcomes(31). However,  
24 340 Professor Martin Marshall, chairman of the RCGP, has highlighted that most consultations are still  
25 341 taking place over the phone as opposed to video calls(61). This may be subject to change with a  
26 342 demographic who are increasingly familiar with the use of the internet. Additionally, in Germany,  
27 343 online platforms as observed in Dermatology may “provide a safe and efficient alternative for face-to-  
28 344 face outpatient care”(25), abiding by social distancing rules.  
29  
30  
31  
32  
33  
34  
35  
36  
37  
38  
39  
40

#### 41 346 **Future direction of online teaching**

42  
43 347  
44  
45 348 Furthermore, the digitalisation of medical teaching could play a significant role in the future of medical  
46 349 schools. Allowing users to tailor their learning and acquire new skills through the chaotic nature of an  
47 350 amplitude of resources could halt the development of medical students. Having discussed benefits of  
48 351 both face-to-face and remote teaching as well as the future of healthcare online, we suggest that in  
49 352 order to maximise the benefits of these learning methods, a mixture of online and in-person teaching  
50 353 should be utilised moving forward. This can be incorporated into an effective learning method such  
51 354 as problem-based learning (PBL) or team-based learning (TBL) which have been shown to improve  
52  
53  
54  
55  
56  
57  
58  
59  
60

1  
2  
3 355 learning outcomes(62,63), student motivation and understanding(64). Students are set online  
4  
5 356 materials to study and are then are expected to discuss content in person in a group tutorial(65). This  
6  
7 357 allows students to study at their own pace, in a manner suitable to them, while also holding them  
8  
9 358 accountable for their own learning. While students find PBL sessions to be interactive and to improve  
10  
11 359 self-directed learning(66,67), TBL has been found to be more engaging and “conducive to learning” in  
12  
13 360 pre-clinical settings, due to smaller groups, ensuring timely tutor feedback(68).  
14  
15  
16  
17 361

18  
19 362 Compared to face-to-face teaching, students in this study felt less satisfied with online teaching and  
20  
21 363 ill-prepared for their profession. With many of these students due to graduate as doctors in the next  
22  
23 364 few years, this is concerning, highlighting the need for medical schools to improve their delivery of  
24  
25 365 medical education given that online teaching is here to stay. Hence, we suggest that until innovative  
26  
27 366 solutions are generated, medical schools adopt TBL or PBL learning styles for efficiently delivering  
28  
29 367 high-yielded teaching.  
30  
31

32 368

### 34 369 **Limitations and Future work**

36 370

37  
38  
39 371 This is the first study to look at the impact of COVID-19 on online teaching across the UK, with  
40  
41 372 responses from 39/40 medical schools. One of the strengths of this study is its large sample size of  
42  
43 373 2792 medical student across all pre-clinical and clinical years. Furthermore, the recruitment of a range  
44  
45 374 of medical students for survey distribution via a range of methods minimised potential response bias.  
46  
47 375 However, this study also had some limitations. Some medical schools may have been  
48  
49 376 disproportionately represented with larger numbers of responses from some schools e.g. Kings  
50  
51 377 College London, compared to newer medical schools such as Aston or Kent, potentially skewing results  
52  
53 378 due to sample bias. Additionally, 68.06% of participants were female, in comparison to 55% of UK  
54  
55 379 medical students who are female(32); thus, the results may not be generalisable to the medical  
56  
57 380 student population. Further, some aspects of this survey depended on participants’ memory perhaps  
58  
59  
60

1  
2  
3 381 influencing their reporting, introducing elements of recall bias. The survey did not evaluate the various  
4  
5 382 ways different content may have been taught e.g. online lectures, games, or question banks;  
6  
7 383 perceptions of game-based online anatomy teaching would have differed from online didactic lectures  
8  
9 384 on immunology. Thus, we cannot truly evaluate the types of online teaching provided. Also, it is  
10  
11 385 important to note that the period covered is usually when students have examinations, hence  
12  
13 386 students may have been spending more time on online teaching platforms regardless. In addition,  
14  
15 387 since this survey, medical schools may have updated their online resources. Lastly, student receptivity  
16  
17 388 to PBL/TBL methods should have been evaluated. To truly measure the impact of COVID-19 on student  
18  
19 389 utilisation of online teaching, a more in-depth, qualitative analysis such as focus groups conducted in  
20  
21 390 collaboration with medical schools is required to gather more accurate results, such as the effects on  
22  
23 391 examination performance.  
24  
25  
26  
27  
28  
29  
30  
31  
32  
33  
34  
35  
36  
37  
38  
39  
40  
41  
42  
43  
44  
45  
46  
47  
48  
49  
50  
51  
52  
53  
54  
55  
56  
57  
58  
59  
60

### 393 **Author Contributions**

394 SD contributed to the study concept and design, and developed the questionnaire. SD recruited  
395 collaborators for survey distribution and data collection. SD supervised the project, had full access to  
396 the data, controlled the decision to publish, and accepts full responsibility for the conduct of this  
397 study, as the guarantor. AH and SD contributed equally to this study as joint first authors. AH  
398 developed and designed the questionnaire, contributed to data acquisition and interpretation, writing  
399 and critical revision of the manuscript. AH is the corresponding author and managed project  
400 administration. MS developed the questionnaire, contributed to data acquisition and interpretation,  
401 and writing and critical revision of the manuscript. AA developed the questionnaire, and contributed  
402 to data visualisation and presentation, and writing and critical revision of the manuscript. LA  
403 performed data analysis, interpretation, visualisation and presentation, and contributed to writing  
404 and critical revision of the manuscript. All authors approved the final version to be published and are  
405 accountable for all aspects of the work. Sixteen students were involved with survey distribution and  
406 data collection.

407

### 408 **Acknowledgements**

409 We thank Bonita Sinartio, Shweta Madhusudanan, Harri Gruffydd Jones, Victoria Selwyn, Rebecca  
410 Conway-Jones, Aqsa Javed, Esmée Nourizadeh, Jack Alan Tagg, Ayshia Bibi, Hyacyntha Celine Hazna  
411 Imelda, Sonya Gibson, Kauther Al-Kaaby, Sharma Kansal, Muzammil Ali Khan, Haya Maki, and Maryam  
412 Goralwalla, for their assistance in distributing the survey link and collecting data. We would also like  
413 to express our gratitude to our supervisor, Dr Samiullah Dost, for his guidance and support throughout  
414 the course of this study.

415

416

### 417 **Copyright**

418



1  
2  
3 419 I, the Submitting Author has the right to grant and does grant on behalf of all authors of the Work (as  
4  
5 420 defined in the below author licence), an exclusive licence for contributions from authors who are: i)  
6  
7 421 UK Crown employees; ii) where BMJ has agreed a CC BY licence shall apply, and/or iii) in accordance  
8  
9 422 with the terms applicable for US Federal Government officers or employees acting as part of their  
10  
11 423 official duties; on a worldwide, perpetual, irrevocable, royalty-free basis to BMJ Publishing Group Ltd  
12  
13 424 (“BMJ”) its licensees and where the relevant Journal is co-owned by BMJ to the co-owners of the  
14  
15 425 Journal, to publish the Work in BMJ Open and any other BMJ products and to exploit all rights, as set  
16  
17 426 out in our licence.  
18  
19  
20  
21  
22

23 428 The Submitting Author accepts and understands that any supply made under these terms is made by  
24  
25 429 BMJ to the Submitting Author unless you are acting as an employee on behalf of your employer or a  
26  
27 430 postgraduate student of an affiliated institution which is paying any applicable article publishing  
28  
29 431 charge (“APC”) for Open Access articles. Where the Submitting Author wishes to make the Work  
30  
31 432 available on an Open Access basis (and intends to pay the relevant APC), the terms of reuse of such  
32  
33 433 Open Access shall be governed by a Creative Commons licence – details of these licences and which  
34  
35 434 Creative Commons licence will apply to this Work are set out in our licence referred to above.  
36  
37  
38  
39  
40

#### 41 436 **Competing Interests**

42  
43 437 All authors have completed the ICMJE Unified Competing Interest form (available on request from the  
44  
45 438 corresponding author) and declare: no support from any organisation for the submitted work; no  
46  
47 439 financial relationships with any organisations that might have an interest in the submitted work in the  
48  
49 440 previous three years, no other relationships or activities that could appear to have influenced the  
50  
51 441 submitted work.  
52  
53  
54  
55

#### 56 442 57 443 **Data sharing** 58 59 60

1  
2  
3 444 Raw data are available upon request from the corresponding author ([ah2716@ic.ac.uk](mailto:ah2716@ic.ac.uk)). Due to the  
4  
5 445 anonymous nature of the survey, it was not possible to disseminate the results of this study to the  
6  
7 446 participants.  
8  
9

10 447

11  
12 448 **Transparency statement**

13  
14 449 The lead author confirms that the manuscript is an honest, accurate, and transparent account of the  
15  
16 450 study; no important aspects of the study have been omitted; and any discrepancies from the study as  
17  
18 451 originally planned have been explained.  
19  
20

21 452

22  
23 453 **Ethical approval**

24  
25 454 Ethical approval was requested from Imperial College London and was deemed not to be required as  
26  
27 455 all data was anonymised, with informed consent taken from all participants. The work was carried out  
28  
29 456 in accordance with the Declaration of Helsinki, including, but not limited to the anonymity of  
30  
31 457 participants being guaranteed and the informed consent of participants being obtained.  
32  
33

34 458

35  
36 459 **Funding**

37  
38  
39 460 This research received no specific grant from any funding agency in the public, commercial or not-  
40 461 for-profit sectors.  
41  
42  
43  
44  
45  
46  
47  
48  
49  
50  
51  
52  
53  
54  
55  
56  
57  
58  
59  
60

1  
2  
3  
4 462 **References**  
5

- 6 463 1. Moss P, Barlow G, Easom N, et al. Lessons for managing high-consequence infections from  
7 first COVID-19 cases in the UK. *The Lancet*. [Online] 2020;395(10227): E46. Available from:  
8 464 doi:10.1016/S0140-6736(20)30463-3  
9  
10 465  
11  
12 466 2. World Health Organisation. *WHO announces COVID-19 outbreak a pandemic*. [Online] World  
13 Health Organisation. Available from: [http://www.euro.who.int/en/health-topics/health-](http://www.euro.who.int/en/health-topics/health-emergencies/coronavirus-covid-19/news/news/2020/3/who-announces-covid-19-outbreak-a-pandemic)  
14 467 [emergencies/coronavirus-covid-19/news/news/2020/3/who-announces-covid-19-outbreak-](http://www.euro.who.int/en/health-topics/health-emergencies/coronavirus-covid-19/news/news/2020/3/who-announces-covid-19-outbreak-a-pandemic)  
15 468 [a-pandemic](http://www.euro.who.int/en/health-topics/health-emergencies/coronavirus-covid-19/news/news/2020/3/who-announces-covid-19-outbreak-a-pandemic) [Accessed: 31st May 2020]  
16 469  
17  
18 470 3. Johnson B. *PM address to the nation on coronavirus: 23 March 2020*. [Online] GOV.UK.  
19 Available from: [https://www.gov.uk/government/speeches/pm-address-to-the-nation-on-](https://www.gov.uk/government/speeches/pm-address-to-the-nation-on-coronavirus-23-march-2020)  
20 471 [coronavirus-23-march-2020](https://www.gov.uk/government/speeches/pm-address-to-the-nation-on-coronavirus-23-march-2020) [Accessed: 29th May 2020]  
21 472  
22  
23 473 4. Hancock M. *Controlling the spread of COVID-19: Health Secretary's statement to Parliament*.  
24 [Online] GOV.UK. Available from: [https://www.gov.uk/government/speeches/controlling-](https://www.gov.uk/government/speeches/controlling-the-spread-of-covid-19-health-secretarys-statement-to-parliament)  
25 474 [the-spread-of-covid-19-health-secretarys-statement-to-parliament](https://www.gov.uk/government/speeches/controlling-the-spread-of-covid-19-health-secretarys-statement-to-parliament) [Accessed: 31st May  
26 475 2020]  
27 476  
28  
29 477 5. Stevens S, Pritchard A. *Letter to chief executives of all NHS trusts and foundation trusts, CCG*  
30 *accountable officers, GP practices and primary care networks, and providers of community*  
31 478 *health services*. [Online] NHS England and NHS Improvement. Available from:  
32 479 [https://www.england.nhs.uk/coronavirus/wp-content/uploads/sites/52/2020/03/urgent-](https://www.england.nhs.uk/coronavirus/wp-content/uploads/sites/52/2020/03/urgent-next-steps-on-nhs-response-to-covid-19-letter-simon-stevens.pdf)  
33 480 [next-steps-on-nhs-response-to-covid-19-letter-simon-stevens.pdf](https://www.england.nhs.uk/coronavirus/wp-content/uploads/sites/52/2020/03/urgent-next-steps-on-nhs-response-to-covid-19-letter-simon-stevens.pdf) [Accessed: 29th May 2020]  
34 481  
35  
36 482 6. Sandhu P, de Wolf M. The impact of COVID-19 on the undergraduate medical curriculum.  
37 *Medical Education Online*. [Online] 2020;25(1). Available from:  
38 483 doi:10.1080/10872981.2020.1764740  
39 484  
40  
41 485 7. General Medical Council. *Information for medical students*. [Online] General Medical Council.  
42 Available from: [https://www.gmc-uk.org/news/news-archive/coronavirus-information-and-](https://www.gmc-uk.org/news/news-archive/coronavirus-information-and-advice/information-for-medical-students)  
43 486 [advice/information-for-medical-students](https://www.gmc-uk.org/news/news-archive/coronavirus-information-and-advice/information-for-medical-students) [Accessed: 27th May 2020]  
44 487

- 1  
2  
3 488 8. O'Doherty D, Dromey M, Loughheed J, et al. Barriers and solutions to online learning in  
4  
5 489 medical education - An integrative review. *BMC Medical Education*. [Online] 2018;18: 130.  
6  
7 490 Available from: doi:10.1186/s12909-018-1240-0  
8  
9  
10 491 9. Harden RM. Trends and the future of postgraduate medical education. *Emergency Medicine*  
11  
12 492 *Journal*. [Online] 2006;23(10): 798–802. Available from: doi:10.1136/emj.2005.033738  
13  
14 493 10. Moran J, Briscoe G, Peglow S. Current Technology in Advancing Medical Education:  
15  
16 494 Perspectives for Learning and Providing Care. *Academic Psychiatry*. [Online] 2018;42: 796–  
17  
18 495 799. Available from: doi:10.1007/s40596-018-0946-y  
19  
20  
21 496 11. Lochner L, Wieser H, Waldboth S, et al. Combining traditional anatomy lectures with e-  
22  
23 497 learning activities: how do students perceive their learning experience? *International journal*  
24  
25 498 *of medical education*. [Online] 2016;7: 69–74. Available from: doi:10.5116/ijme.56b5.0369  
26  
27  
28 499 12. Pei L, Wu H. Does online learning work better than offline learning in undergraduate medical  
29  
30 500 education? A systematic review and meta-analysis. *Medical Education Online*. [Online] 2019;  
31  
32 501 Available from: doi:10.1080/10872981.2019.1666538  
33  
34 502 13. Evans DJR, Bay BH, Wilson TD, et al. Going Virtual to Support Anatomy Education: A STOP  
35  
36 503 GAP in the Midst of the Covid-19 Pandemic. *Anatomical sciences education*. [Online]  
37  
38 504 2020;13(3): 279–283. Available from: doi:10.1002/ase.1963  
39  
40  
41 505 14. Kay D, Pasarica M. Using technology to increase student (and faculty satisfaction with)  
42  
43 506 engagement in medical education. *Advances in physiology education*. [Online] 2019;43(3):  
44  
45 507 408–413. Available from: doi:10.1152/advan.00033.2019  
46  
47  
48 508 15. Universities UK International. *INTERNATIONAL FACTS AND FIGURES 2019*. [Online]  
49  
50 509 Universities UK International. Available from:  
51  
52 510 [https://www.universitiesuk.ac.uk/International/Documents/2019/International\\_facts\\_and](https://www.universitiesuk.ac.uk/International/Documents/2019/International_facts_and_figures_slides.pdf)  
53  
54 511 [figures\\_slides.pdf](https://www.universitiesuk.ac.uk/International/Documents/2019/International_facts_and_figures_slides.pdf) [Accessed: 30th May 2020]  
55  
56  
57 512 16. Khalil MK, Abdel Meguid EM, Elkhider IA. Teaching of anatomical sciences: A blended learning  
58  
59 513 approach. *Clinical Anatomy*. [Online] 2018;31(3): 323–329. Available from:  
60

- 1  
2  
3 514 doi:10.1002/ca.23052  
4  
5 515 17. Barry DS, Marzouk F, Chulak-Oglu K, et al. Anatomy education for the YouTube generation.  
6  
7 516 *Anatomical Sciences Education*. [Online] 2016;9(1): 90–96. Available from:  
8  
9 517 doi:10.1002/ase.1550  
10  
11 518 18. Longhurst GJ, Stone DM, Dulohery K, et al. Strength, Weakness, Opportunity, Threat (SWOT)  
12  
13 519 Analysis of the Adaptations to Anatomical Education in the United Kingdom and Republic of  
14  
15 520 Ireland in Response to the COVID-19 Pandemic. *Anatomical sciences education*. [Online]  
16  
17 521 2020;13(3): 301–311. Available from: doi:10.1002/ase.1967  
18  
19 522 19. Huddart D, Hirniak J, Sethi R, et al. #Med StudentCovid – How social media is supporting  
20  
21 523 students during COVID-19. *Medical Education*. [Online] 2020; Available from:  
22  
23 524 doi:10.1111/medu.14215  
24  
25 525 20. Gallo G, Sturiale A, De Simone V, et al. Epistemic Networks on Twitter: A New Way To Learn.  
26  
27 526 *Journal of Investigative Surgery*. [Online] 2019; Available from:  
28  
29 527 doi:10.1080/08941939.2019.1656787  
30  
31 528 21. Ahmed H, Allaf M, Elghazaly H. *COVID-19 and medical education*. [Online] The Lancet  
32  
33 529 Infectious Diseases. 2020. Available from: doi:10.1016/S1473-3099(20)30226-7  
34  
35 530 22. Rose S. Medical Student Education in the Time of COVID-19. *JAMA*. [Online] 2020;323(21):  
36  
37 531 2131–2132. Available from: doi:10.1001/jama.2020.5227  
38  
39 532 23. Wong TW, Lee CK, Tam W, et al. Cluster of SARS among Medical Students Exposed to Single  
40  
41 533 Patient, Hong Kong. *Emerging Infectious Diseases*. [Online] 2004;10(2): 269–276. Available  
42  
43 534 from: doi:10.3201/eid1002.030452  
44  
45 535 24. Roberts M. *Coronavirus: Has the NHS got enough PPE?*. [Online] BBC News. Available from:  
46  
47 536 <https://www.bbc.co.uk/news/health-52254745> [Accessed: 31st May 2020]  
48  
49 537 25. Reinholz M, French LE. Medical education and care in dermatology during the SARS-CoV2  
50  
51 538 pandemic: challenges and chances. *Journal of the European Academy of Dermatology and*  
52  
53 539 *Venereology : JEADV*. [Online] 2020;34(5): e214–e216. Available from: doi:10.1111/jdv.16391  
54  
55  
56  
57  
58  
59  
60

- 1  
2  
3 540 26. Baker DM, Bhatia S, Brown S, et al. Medical student involvement in the COVID-19 response.  
4  
5 541 *The Lancet*. [Online] 2020;395(10232): 1254. Available from: doi:10.1016/S0140-  
6  
7 542 6736(20)30795-9  
8  
9  
10 543 27. Watson A, McKinnon T, Prior SD, et al. COVID-19: time for a bold new strategy for medical  
11  
12 544 education. *Medical Education Online*. [Online] 2020;25(1). Available from:  
13  
14 545 doi:10.1080/10872981.2020.1764741  
15  
16 546 28. Roff S, McAleer S, Harden RM, et al. Development and validation of the Dundee Ready  
17  
18 547 Education Environment Measure (DREEM). *Medical Teacher*. [Online] 1997;19(4): 295–299.  
19  
20 548 Available from: doi:10.3109/01421599709034208  
21  
22  
23 549 29. Miles S, Swift L, Leinster SJ. The Dundee Ready Education Environment Measure (DREEM): A  
24  
25 550 review of its adoption and use. *Medical Teacher*. [Online] 2012;34: e620–e634. Available  
26  
27 551 from: doi:10.3109/0142159X.2012.668625  
28  
29  
30 552 30. Qualtrics. *Qualtrics*. [Online] Provo, Utah, USA; 2019. Available from:  
31  
32 553 <https://www.qualtrics.com>  
33  
34 554 31. Medical Schools Council. *Medical Schools A-Z*. [Online] Available from:  
35  
36 555 <https://www.medschools.ac.uk/studying-medicine/medical-schools> [Accessed: 28th May  
37  
38 556 2020]  
39  
40  
41 557 32. General Medical Council. *The state of medical education and practice in the UK*. [Online] 2019  
42  
43 558 [Accessed: 20th August 2020]. Available from: [https://www.gmc-uk.org/-](https://www.gmc-uk.org/-/media/documents/the-state-of-medical-education-and-practice-in-the-uk---workforce-report_pdf-80449007.pdf)  
44  
45 559 [/media/documents/the-state-of-medical-education-and-practice-in-the-uk---workforce-](https://www.gmc-uk.org/-/media/documents/the-state-of-medical-education-and-practice-in-the-uk---workforce-report_pdf-80449007.pdf)  
46  
47 560 [report\\_pdf-80449007.pdf](https://www.gmc-uk.org/-/media/documents/the-state-of-medical-education-and-practice-in-the-uk---workforce-report_pdf-80449007.pdf) [Accessed: 20th August 2020]  
48  
49  
50 561 33. Schwartz B. The Tyranny of Choice. *Scientific American*. [Online] 2004;290(4): 70–75.  
51  
52 562 Available from: doi:10.1038/scientificamerican0404-70  
53  
54 563 34. Ackerman DS, Gross BL. How many choices are good? Measurement of the effects of course  
55  
56 564 choice on perceptions of a marketing option. *Journal of Marketing Education*. [Online]  
57  
58 565 2006;28(1): 69–80. Available from: doi:10.1177/0273475305284642  
59  
60

- 1  
2  
3 566 35. Moszkowicz D, Duboc H, Dubertret C, et al. Daily medical education for confined students  
4  
5 567 during COVID-19 pandemic: A simple videoconference solution. *Clinical Anatomy*. [Online]  
6  
7 568 2020; 1–2. Available from: doi:10.1002/ca.23601
- 9  
10 569 36. Chen NS, Ko HC, Kinshuk, et al. A model for synchronous learning using the Internet.  
11  
12 570 *Innovations in Education and Teaching International*. [Online] 2005;42(2): 181–194. Available  
13  
14 571 from: doi:10.1080/14703290500062599
- 16 572 37. Hrastinski S. Asynchronous & Synchronous E-Learning. *EDUCAUSE Quarterly*. [Online] 2008;4.  
17  
18 573 Available from: <https://er.educause.edu/-/media/files/article-downloads/eqm0848.pdf>  
19  
20 574 [Accessed: 28th May 2020]
- 23 575 38. Prashanth GP, Ismail SK. The Dundee Ready Education Environment Measure: A prospective  
24  
25 576 comparative study of undergraduate medical students' and interns' perceptions in Oman.  
26  
27 577 *Sultan Qaboos University Medical Journal*. [Online] 2018;18(2): e173–e181. Available from:  
28  
29 578 doi:10.18295/squmj.2018.18.02.009
- 32 579 39. Miles S, Leinster SJ. Medical students' perceptions of their educational environment:  
33  
34 580 Expected versus actual perceptions. *Medical Education*. [Online] 2007;41(3): 265–272.  
35  
36 581 Available from: doi:10.1111/j.1365-2929.2007.02686.x
- 39 582 40. Patil AA, Chaudhari VL. Students' perception of the educational environment in medical  
40  
41 583 college: a study based on DREEM questionnaire. *Korean journal of medical education*.  
42  
43 584 [Online] 2016;28(3): 281–288. Available from: doi:10.3946/kjme.2016.32
- 45 585 41. Dunne F, McAleer S, Roff S. Assessment of the undergraduate medical education  
46  
47 586 environment in a large UK medical school. *Health Education Journal*. [Online] 2006;65(2):  
48  
49 587 149–158. Available from: doi:10.1177/001789690606500205
- 52 588 42. Palés J, Gual A, Escanero J, et al. Educational climate perception by preclinical and clinical  
53  
54 589 medical students in five Spanish medical schools. *International journal of medical education*.  
55  
56 590 [Online] 2015;6: 65–75. Available from: doi:10.5116/ijme.5557.25f9
- 59 591 43. Demiroren M, Palaoglu O, Kemahli S, et al. Perceptions of Students in Different Phases of  
60

- 1  
2  
3 592 Medical Education of Educational Environment: Ankara University Faculty of Medicine.  
4  
5 593 *Medical Education Online*. [Online] 2008;13: 8. Available from: doi:10.3402/meo.v13i.4477  
6  
7  
8 594 44. Dreyer A, Gibbs A, Smalley S, et al. Clinical associate students' perception of the educational  
9  
10 595 environment at the university of the witwatersrand, Johannesburg. *African Journal of Primary*  
11  
12 596 *Health Care and Family Medicine*. [Online] 2015;7(1): 778. Available from:  
13  
14 597 doi:10.4102/phcfm.v7i1.778  
15  
16 598 45. Riquelme A, Oporto M, Oporto J, et al. Measuring students' perceptions of the educational  
17  
18 599 climate of the new curriculum at the Pontificia Universidad Católica de Chile: Performance of  
19  
20 600 the Spanish translation of the Dundee Ready Education Environment Measure (DREEM).  
21  
22 601 *Education for Health: Change in Learning and Practice*. 2009;22(1): 112.  
23  
24  
25 602 46. Tang B, Coret A, Qureshi A, et al. Online lectures in undergraduate medical education:  
26  
27 603 Scoping review. *Journal of Medical Internet Research*. [Online] 2018;4(1): e11. Available from:  
28  
29 604 doi:10.2196/mededu.9091  
30  
31  
32 605 47. Finn Y, Avalos G, Dunne F. Positive changes in the medical educational environment following  
33  
34 606 introduction of a new systems-based curriculum: DREEM or reality? Curricular change and  
35  
36 607 the Environment. *Irish Journal of Medical Science*. [Online] 2014;183(2): 253–258. Available  
37  
38 608 from: doi:10.1007/s11845-013-1000-4  
39  
40  
41 609 48. Paechter M, Maier B. Online or face-to-face? Students' experiences and preferences in e-  
42  
43 610 learning. *Internet and Higher Education*. [Online] 2010;13: 292–297. Available from:  
44  
45 611 doi:10.1016/j.iheduc.2010.09.004  
46  
47  
48 612 49. Ifediora CO. Online Medical Education for Doctors: Identifying Potential Gaps to the  
49  
50 613 Traditional, Face-to-Face Modality. *Journal of Medical Education and Curricular Development*.  
51  
52 614 [Online] 2019;6: 1–8. Available from: doi:10.1177/2382120519827912  
53  
54  
55 615 50. Monrouxe L V., Grundy L, Mann M, et al. How prepared are UK medical graduates for  
56  
57 616 practice? A rapid review of the literature 2009-2014. *BMJ Open*. [Online] 2017;7(1). Available  
58  
59 617 from: doi:10.1136/bmjopen-2016-013656  
60



- 1  
2  
3 618 51. Guo PJ, Kim J, Rubin R. How video production affects student engagement: An empirical  
4  
5 619 study of MOOC videos. *L@S 2014 - Proceedings of the 1st ACM Conference on Learning at*  
6  
7 620 *Scale*. [Online] 2014. Available from: doi:10.1145/2556325.2566239  
8  
9  
10 621 52. Wynter L, Burgess A, Kalman E, et al. Medical students: What educational resources are they  
11  
12 622 using? *BMC Medical Education*. [Online] 2019;19(36). Available from: doi:10.1186/s12909-  
13  
14 623 019-1462-9  
15  
16 624 53. Rondon S, Sassi FC, Furquim De Andrade CR. Computer game-based and traditional learning  
17  
18 625 method: A comparison regarding students' knowledge retention. *BMC Medical Education*.  
19  
20 626 [Online] 2013;13: 30. Available from: doi:10.1186/1472-6920-13-30  
21  
22  
23 627 54. Ya Ni A. Comparing the Effectiveness of Classroom and Online Learning: Teaching Research  
24  
25 628 Methods. *Journal of Public Affairs Education*. 2013;19(2): 199–215.  
26  
27  
28 629 55. Keis O, Grab C, Schneider A, et al. Online or face-to-face instruction? A qualitative study on  
29  
30 630 the electrocardiogram course at the University of Ulm to examine why students choose a  
31  
32 631 particular format. *BMC Medical Education*. [Online] 2017;17: 194. Available from:  
33  
34 632 doi:10.1186/s12909-017-1053-6  
35  
36  
37 633 56. Zureick AH, Burk-Rafel J, Purkiss JA, et al. The interrupted learner: How distractions during  
38  
39 634 live and video lectures influence learning outcomes. *Anatomical Sciences Education*. [Online]  
40  
41 635 2018;11(4): 366–376. Available from: doi:10.1002/ase.1754  
42  
43  
44 636 57. Cao W, Fang Z, Hou G, et al. The psychological impact of the COVID-19 epidemic on college  
45  
46 637 students in China. *Psychiatry Research*. [Online] 2020;287. Available from:  
47  
48 638 doi:10.1016/j.psychres.2020.112934  
49  
50  
51 639 58. Stowell J, Bennett D. Effects of online testing on student exam performance and test anxiety.  
52  
53 640 *Journal of Educational Computing Research*. [Online] 2010;42(2): 161–171. Available from:  
54  
55 641 doi:10.2190/EC.42.2.b  
56  
57 642 59. Mahase E. Covid-19: medical students to be employed by NHS as part of epidemic response.  
58  
59 643 *BMJ (Clinical research ed.)*. [Online] 2020;368: m1156. Available from:  
60

- 1  
2  
3 644 doi:10.1136/bmj.m1156  
4  
5 645 60. British Medical Association. *COVID-19: early provisional registration for final year students*.  
6  
7 646 [Online] BMA - COVID-19. Available from: <https://www.bma.org.uk/advice-and->  
8  
9 647 [support/covid-19/returning-to-the-nhs-or-starting-a-new-role/covid-19-early-provisional-](https://www.bma.org.uk/advice-and-support/covid-19/returning-to-the-nhs-or-starting-a-new-role/covid-19-early-provisional-)  
10  
11 648 [registration-for-final-year-students](https://www.bma.org.uk/advice-and-support/covid-19/returning-to-the-nhs-or-starting-a-new-role/covid-19-early-provisional-registration-for-final-year-students) [Accessed: 28th May 2020]  
12  
13  
14 649 61. Lynch P, Wainwright D. *Coronavirus: How GPs have stopped seeing most patients in person*.  
15  
16 650 [Online] BBC News. Available from: <https://www.bbc.co.uk/news/uk-england-52216222>  
17  
18 651 [Accessed: 31st May 2020]  
19  
20  
21 652 62. Yew EHJ, Goh K. Problem-Based Learning: An Overview of its Process and Impact on Learning.  
22  
23 653 *Health Professions Education*. [Online] 2016;2(2): 75–79. Available from:  
24  
25 654 doi:10.1016/j.hpe.2016.01.004  
26  
27  
28 655 63. Clark CE. Problem-based learning: How do the outcomes compare with traditional teaching?  
29  
30 656 *British Journal of General Practice*. [Online] 2006;56(530): 722–723. Available from:  
31  
32 657 <https://www.ncbi.nlm.nih.gov/pmc/articles/PMC1876647/> [Accessed: 30th May 2020]  
33  
34 658 64. Klegeris A, Hurren H. Impact of problem-based learning in a large classroom setting: Student  
35  
36 659 perception and problem-solving skills. *American Journal of Physiology - Advances in*  
37  
38 660 *Physiology Education*. [Online] 2011;35: 408–415. Available from:  
39  
40 661 doi:10.1152/advan.00046.2011  
41  
42  
43 662 65. Chang BJ. Problem-based learning in medical school: A student's perspective. *Annals of*  
44  
45 663 *Medicine and Surgery*. [Online] 2016;12: 88–89. Available from:  
46  
47 664 doi:10.1016/j.amsu.2016.11.011  
48  
49  
50 665 66. Yadav RL, Piryani RM, Deo GP, et al. Attitude and perception of undergraduate medical  
51  
52 666 students toward the problem-based learning in Chitwan Medical College, Nepal. *Advances in*  
53  
54 667 *Medical Education and Practice*. [Online] 2018;4(9): 317–322. Available from:  
55  
56 668 doi:10.2147/amep.s160814  
57  
58  
59 669 67. Al-Drees AA, Khalil MS, Irshad M, et al. Students' perception towards the problem based  
60

- 1  
2  
3 670 learning tutorial session in a system-based hybrid curriculum. *Saudi Medical Journal*. [Online]  
4  
5 671 2015;36(3): 341–348. Available from: doi:10.15537/smj.2015.3.10216  
6  
7 672 68. Burgess A, Bleasel J, Haq I, et al. Team-based learning (TBL) in the medical curriculum: Better  
8  
9 than PBL? *BMC Medical Education*. [Online] 2017;17: 243. Available from:  
10 673  
11  
12 674 doi:10.1186/s12909-017-1068-z  
13  
14 675  
15  
16  
17  
18  
19  
20  
21  
22  
23  
24  
25  
26  
27  
28  
29  
30  
31  
32  
33  
34  
35  
36  
37  
38  
39  
40  
41  
42  
43  
44  
45  
46  
47  
48  
49  
50  
51  
52  
53  
54  
55  
56  
57  
58  
59  
60

1  
2  
3 676 **Figure Legends**  
4

5 677  
6

7 678 **Figure 1.** Students were asked about the different types of online teaching platforms they used before  
8 the COVID-19 pandemic as represented by this bar chart (n=2721). Options included live tutorial by  
9 the medical school, live tutorial by other sources, online question banks, online/digital flashcards, pre-  
10 recorded lectures/tutorials, video tutorials e.g. YouTube, none, or other).  
11  
12  
13  
14  
15  
16

17 682

18 683 **Figure 2.** Students were asked the approximate number of hours spent on online teaching platforms  
19 before and during the COVID-19 pandemic (n=2721). A – A bar graph comparing the number of hours  
20 spent on online platforms before and during the COVID-19 pandemic by students overall. A Wilcoxon  
21 test was then conducted which found the difference to be significant ( $p<0.05$ ). B i - A bar graph  
22 comparing the number of hours spent on online platforms by pre-clinical and clinical students before  
23 the COVID-19 pandemic. B ii - A bar graph comparing the number of hours spent on online platforms  
24 by pre-clinical and clinical students during the COVID-19 pandemic. A Mann-Whitney U test found the  
25 difference in time spent between the students during the COVID-19 pandemic to be significant  
26 ( $p<0.001$ ).  
27  
28  
29  
30  
31  
32  
33  
34  
35  
36  
37  
38  
39  
40

41 693

42 694 **Figure 3.** A bar chart outlining the advantages of and barriers to online teaching. A – Students were  
43 provided with a list of potential ways in which online teaching was advantageous and they were asked  
44 to select all which applied to them. They were also given the option to input their own statements  
45 (n=2721). B – Students were provided with a list of potential barriers to the benefits they may receive  
46 from online teaching and they were asked to select all which applied to them. They were also given  
47 the option to input their own statements (n=2721).  
48  
49  
50  
51  
52  
53  
54  
55  
56  
57  
58  
59  
60

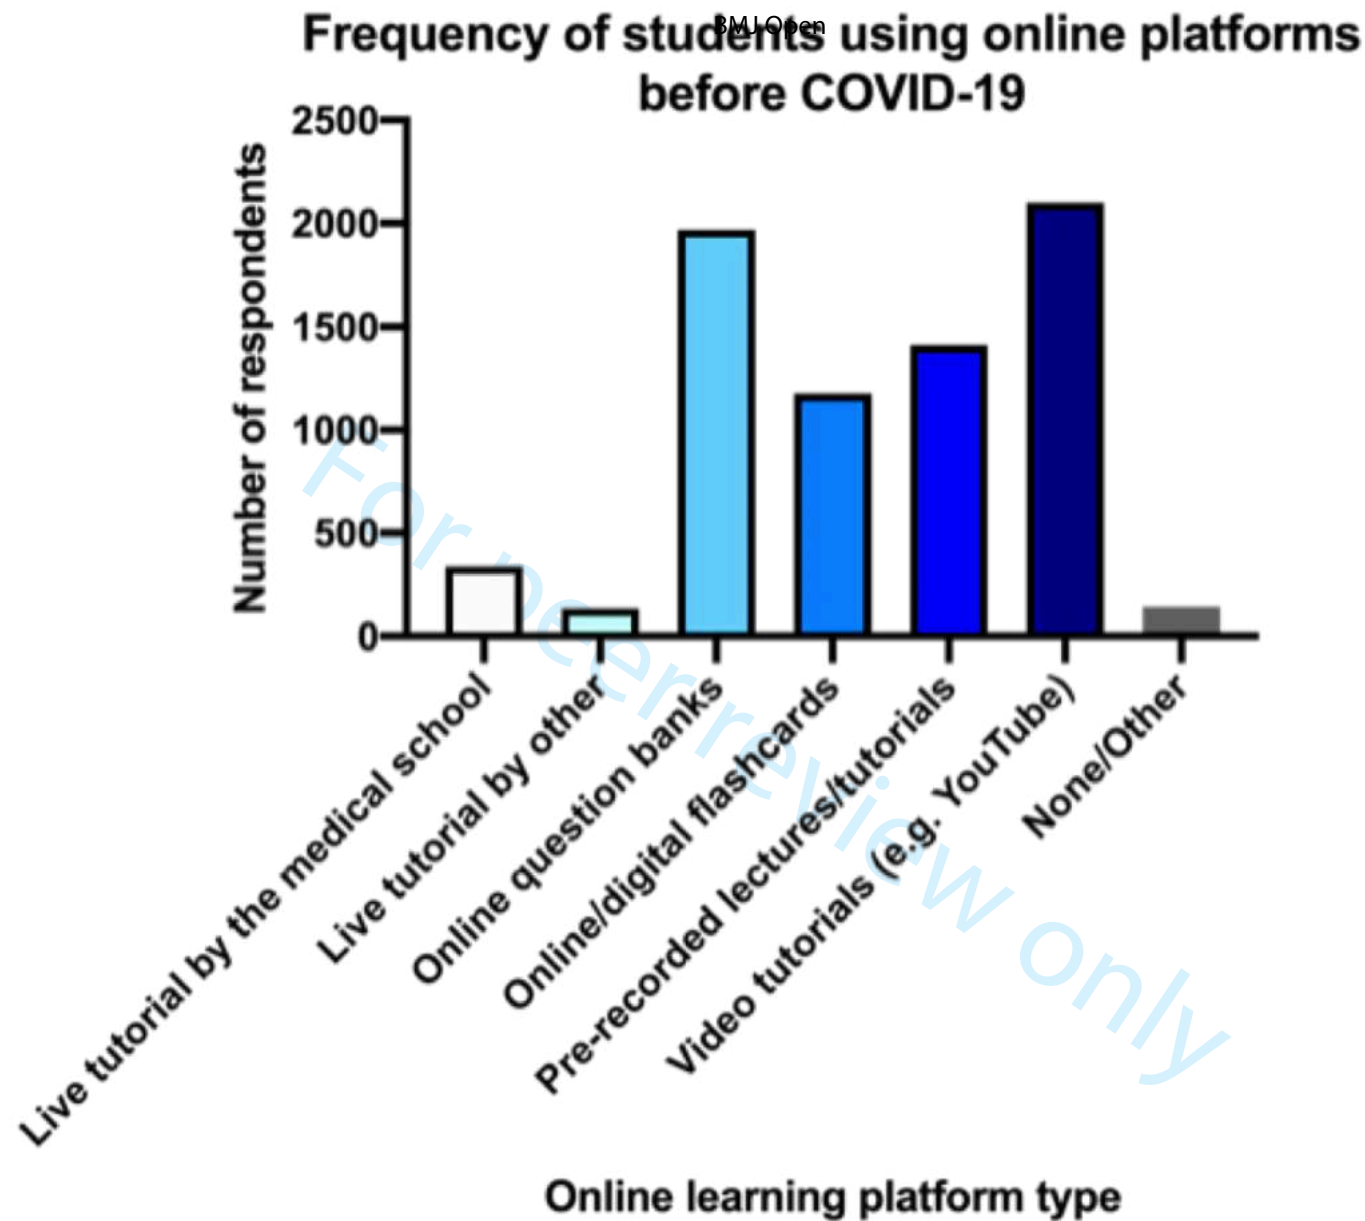

**Figure 1.** Students were asked about the different types of online teaching platforms they used before the COVID-19 pandemic as represented by this bar chart (n=2721). Options included live tutorials by the medical school, live tutorials by other sources, online question banks, online/digital flashcards, pre-recorded lectures/tutorials, video tutorials e.g. Youtube, none, or other).

A

### Number of hours spent on online platforms before and during COVID-19 pandemic

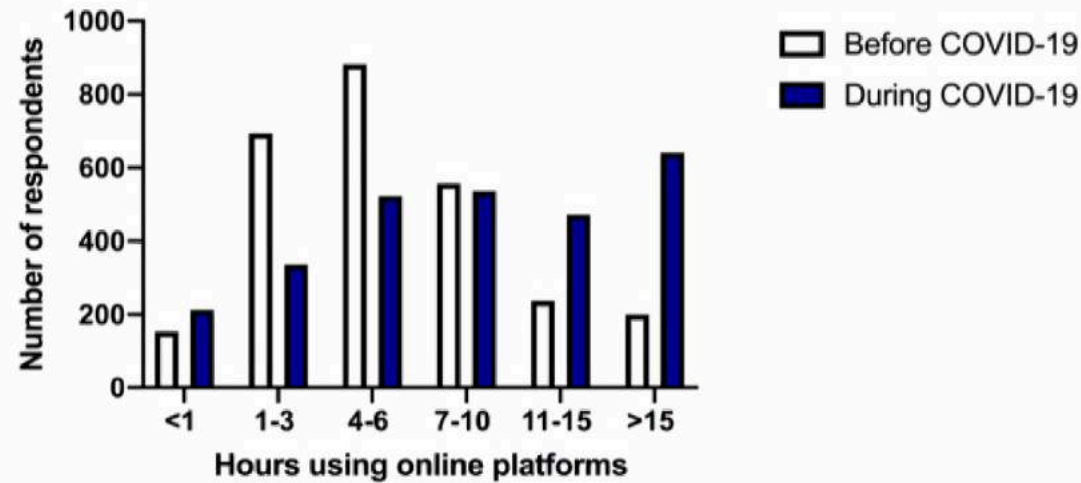

B i

### Number of hours spent on online platforms by pre-clinical vs clinical students before COVID-19 pandemic

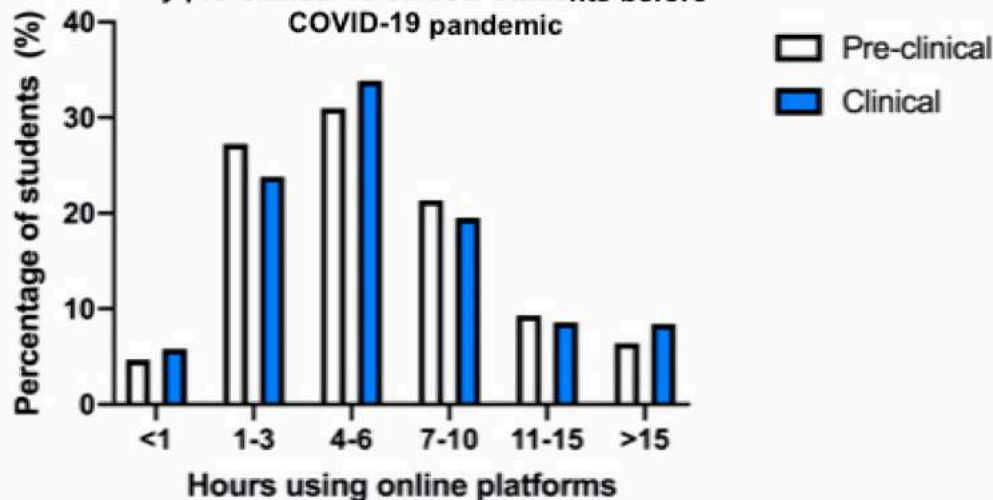

B ii

### Number of hours spent on online platforms by pre-clinical vs clinical students during COVID-19 pandemic

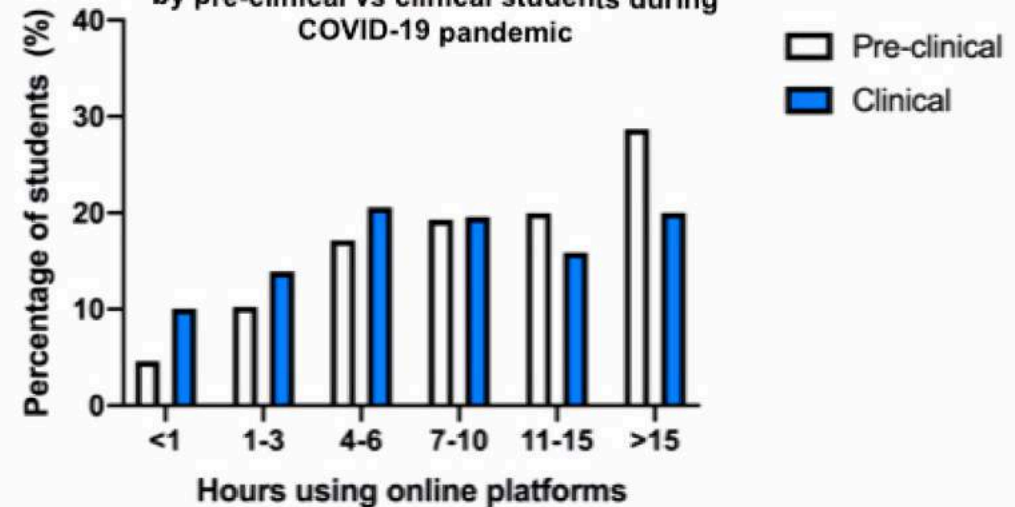

**Figure 2.** Students were asked the approximate number of hours spent on online teaching platforms before and during the COVID-19 pandemic (n=2721). A – A bar graph comparing the number of hours spent on online platforms before and during the COVID-19 pandemic by students overall. A Wilcoxon test was then conducted which found the difference to be significant ( $p < 0.05$ ). B i - A bar graph comparing the number of hours spent on online platforms by pre-clinical and clinical students before the COVID-19 pandemic. B ii - A bar graph comparing the number of hours spent on online platforms by pre-clinical and clinical students during the COVID-19 pandemic. A Mann-Whitney U test found the difference in time spent between the students during the COVID-19 pandemic to be significant ( $p < 0.001$ ).

A

B

### Frequency of responses to the different advantages of online teaching

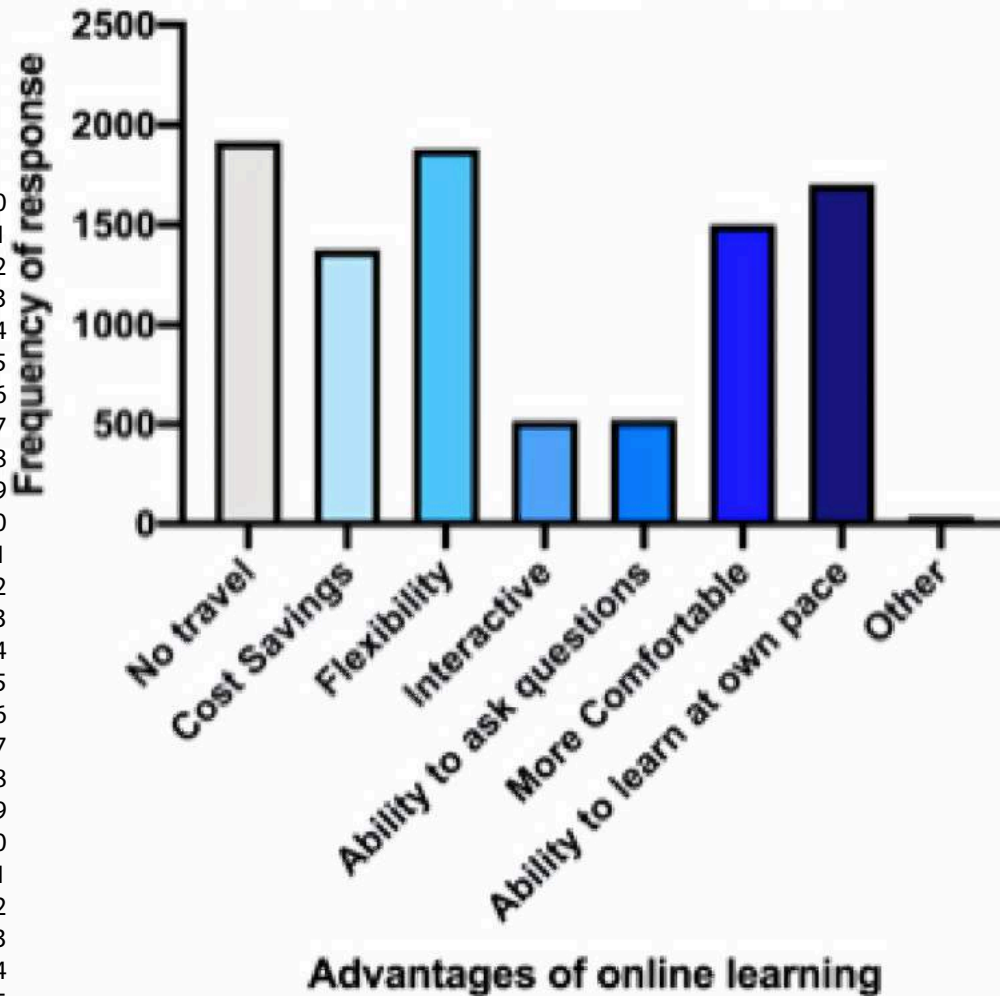

### Frequency of responses to the different advantages of online teaching

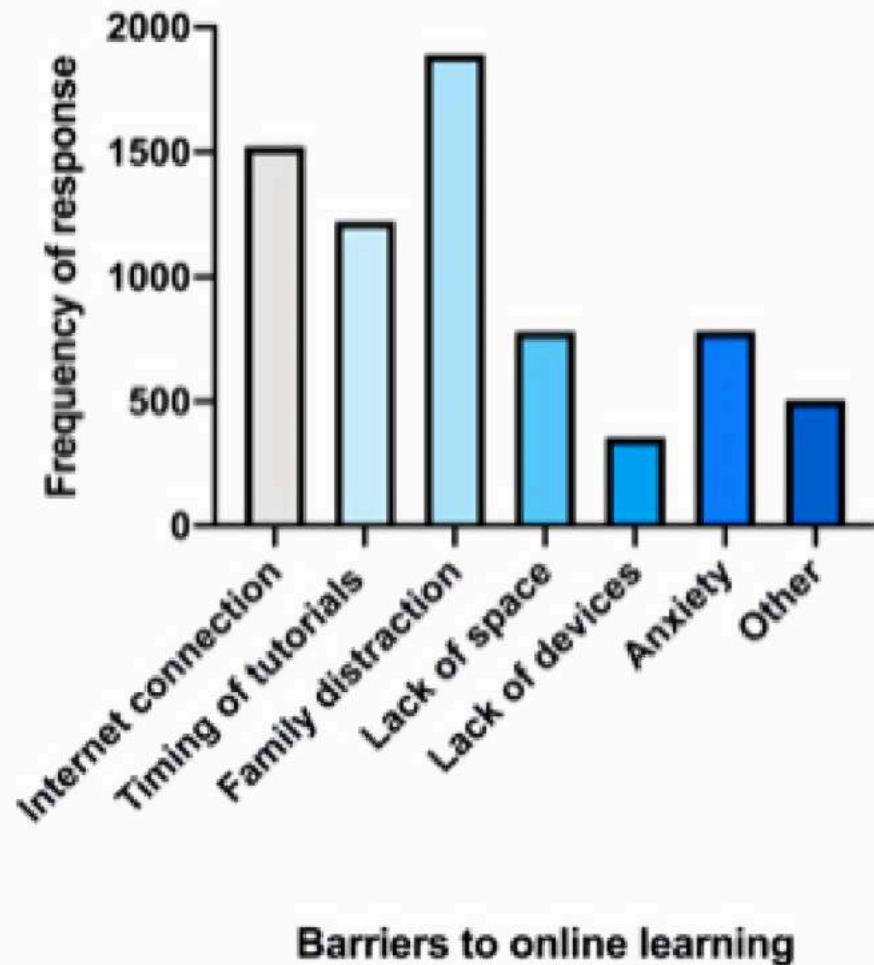

**Figure 3.** A bar chart outlining the advantages of and barriers to online teaching. **A-** Students were provided with a list of potential ways in which online teaching was advantageous and they were asked to select all which applied to them. They were also given the option to input their own statements (n=2721). **B-** Students were provided with a list of potential barriers to the benefits they may receive from online teaching and they were asked to select all which applied to them. They were also given the option to input their own statements (n=2721).

## Appendix

### **Appendix I – Online Questionnaire**

#### **Covid-19, Online Learning & Medical Education**

Thank you for your interest in completing our short survey investigating the role of online learning in facilitating medical education during the Covid-19 pandemic in the UK. The data collected is **non-identifiable** and will be used for research purposes.

This survey will close on Monday 11th May at 10pm.

Please tick the box to proceed:

I consent to my information being used for research purposes and this is my first time completing this survey.

Survey Code:

#### **Background**

1. Which UK Medical School do you attend?

2. What year are you in?

3. What is your gender?



## Online Learning & Medical Education

4. Prior to the Covid-19 pandemic, which online learning platforms/resources did you engage with? (Please select all which apply)

Video tutorials e.g. Youtube/Osmosis

Live tutorials via Zoom/similar platforms by **Medical School**

Live tutorials via Zoom/similar platforms by **other sources**

Online question banks

Online/Digital Flashcards e.g. Brainscape, Anki

Pre-recorded tutorials via Medical School specific online learning platform

None

Other - please specify

5. Which method of online learning do you find the most effective? Please rank the following methods from 1-5 (1=most effective, 5=least effective)

Video tutorials e.g. Youtube/Osmosis

Live tutorials via Zoom/similar platforms

Online question banks

Online/Digital Flashcards e.g. Brainscape, Anki

Other - please specify:

1  
2  
3  
4 6. Prior to the Covid-19 pandemic, how many hours per week did  
5 you spend on average on online learning?  
6  
7

8   
9

10 7. During the current Covid-19 pandemic, how has your medical  
11 school adapted teaching for your year? (Please select all which  
12 apply)  
13  
14  
15

16  Introduced a new online learning platform with new resources

17  Introduced new resources to an existing online learning platform

18  Delivered live tutorials via Zoom/similar platforms

19  Delivered pre-recorded tutorials

20  Other - please specify:

21   
22  
23  
24

25 8. Are these online teaching sessions interactive?  
26  
27  
28

29  Yes

30  No

31  Majority are

32  Majority are not

33 8b. What makes your teaching sessions interactive? (Please  
34 select all which apply)  
35  
36  
37

38  Opportunity to interact via chat box

39  Opportunity to interact via speech

40  Live quiz  
41  
42  
43  
44  
45  
46  
47  
48  
49  
50  
51  
52  
53  
54  
55  
56  
57  
58  
59  
60

Other - please specify:

9. Does the online learning follow a pre-set curriculum, or is it based on student requests?

- Pre-set curriculum
- Student requests
- Combination of both

10. During the current Covid-19 pandemic, how many hours per week do you spend on average on online learning?

### Student Perceptions of Online Learning

11. Please rank the following statements on your experience of online learning from 1-5 (1=Strongly disagree, 5 = Strongly agree)

0                      1                      2                      3                      4                      5

The teaching is often stimulating

I find it easy to engage in the lesson

I feel able to ask the questions I want

I enjoy the online teaching

1  
2  
3  
4  
5  
6  
7  
8  
9  
10  
11  
12  
13  
14  
15  
16  
17  
18  
19  
20  
21  
22  
23  
24  
25  
26  
27  
28  
29  
30  
31  
32  
33  
34  
35  
36  
37  
38  
39  
40  
41  
42  
43  
44  
45  
46  
47  
48  
49  
50  
51  
52  
53  
54  
55  
56  
57  
58  
59  
60

I would like the online teaching to be more interactive

I feel that online teaching is as effective as face-face teaching

I prefer online teaching to face-face teaching

The teachers are well prepared for the teaching sessions

I feel I am being well prepared for my profession

My internet connection can be problematic

12. What aspects of online learning do you enjoy? (Please select all which apply)

No travel

Ability to ask questions

Cost savings

More comfortable

Interactive

Ability to learn at own pace

Flexibility

Other - please specify:

13. What do you feel are the barriers to online learning? (Please select all which apply)

Internet connection

Lack of space

Timing of tutorials

Lack of devices

Family distractions

Anxiety

Other - please specify:

### Role of Online Learning in Clinical Teaching

14a. Do you feel online learning has successfully replaced the clinical teaching you receive from direct patient contact?

Yes  
 No  
 Yes, to some extent  
 N/A

14b. Do you feel able to learn practical clinical skills through online learning?

Yes  
 No  
 Yes, to some extent  
 N/A

15. Have your examinations been affected by Covid-19?

Yes

No

N/A

1  
2  
3  
4 15b. How have your written examinations been affected?  
5  
6

- 7 ✓  
8 Written exams will take place remotely online  
9 Written exams have been postponed  
10 Written exams have been cancelled  
11 N/A

12 15c. How have your practical examinations been affected?  
13  
14

- 15 ✓  
16 Practical exams will take place with modifications (e.g. virtual patients)  
17 Practical exams have been postponed  
18 Practical exams have been cancelled  
19 N/A  
20  
21  
22  
23  
24  
25  
26  
27  
28  
29  
30  
31  
32  
33  
34  
35  
36  
37  
38  
39  
40  
41  
42  
43  
44  
45  
46  
47  
48  
49  
50  
51  
52  
53  
54  
55  
56  
57  
58  
59  
60

STROBE Statement—Checklist of items that should be included in reports of *cohort studies*

|                              | Item No | Recommendation                                                                                                                                                                                                                                                                                                         | Page No    |
|------------------------------|---------|------------------------------------------------------------------------------------------------------------------------------------------------------------------------------------------------------------------------------------------------------------------------------------------------------------------------|------------|
| <b>Title and abstract</b>    | 1       | (a) Indicate the study's design with a commonly used term in the title or the abstract                                                                                                                                                                                                                                 | 1          |
|                              |         | (b) Provide in the abstract an informative and balanced summary of what was done and what was found                                                                                                                                                                                                                    | 2          |
| <b>Introduction</b>          |         |                                                                                                                                                                                                                                                                                                                        |            |
| Background/rationale         | 2       | Explain the scientific background and rationale for the investigation being reported                                                                                                                                                                                                                                   | 4          |
| Objectives                   | 3       | State specific objectives, including any prespecified hypotheses                                                                                                                                                                                                                                                       | 5          |
| <b>Methods</b>               |         |                                                                                                                                                                                                                                                                                                                        |            |
| Study design                 | 4       | Present key elements of study design early in the paper                                                                                                                                                                                                                                                                | 6          |
| Setting                      | 5       | Describe the setting, locations, and relevant dates, including periods of recruitment, exposure, follow-up, and data collection                                                                                                                                                                                        | 6          |
| Participants                 | 6       | (a) Give the eligibility criteria, and the sources and methods of selection of participants. Describe methods of follow-up<br>(b) For matched studies, give matching criteria and number of exposed and unexposed                                                                                                      | 6          |
| Variables                    | 7       | Clearly define all outcomes, exposures, predictors, potential confounders, and effect modifiers. Give diagnostic criteria, if applicable                                                                                                                                                                               | 6          |
| Data sources/<br>measurement | 8*      | For each variable of interest, give sources of data and details of methods of assessment (measurement). Describe comparability of assessment methods if there is more than one group                                                                                                                                   | 6          |
| Bias                         | 9       | Describe any efforts to address potential sources of bias                                                                                                                                                                                                                                                              | 6-8,<br>18 |
| Study size                   | 10      | Explain how the study size was arrived at                                                                                                                                                                                                                                                                              | 6          |
| Quantitative variables       | 11      | Explain how quantitative variables were handled in the analyses. If applicable, describe which groupings were chosen and why                                                                                                                                                                                           | 7          |
| Statistical methods          | 12      | (a) Describe all statistical methods, including those used to control for confounding<br>(b) Describe any methods used to examine subgroups and interactions<br>(c) Explain how missing data were addressed<br>(d) If applicable, explain how loss to follow-up was addressed<br>(e) Describe any sensitivity analyses | 7          |
| <b>Results</b>               |         |                                                                                                                                                                                                                                                                                                                        |            |
| Participants                 | 13*     | (a) Report numbers of individuals at each stage of study—eg numbers potentially eligible, examined for eligibility, confirmed eligible, included in the study, completing follow-up, and analysed<br>(b) Give reasons for non-participation at each stage<br>(c) Consider use of a flow diagram                        | 8-9        |
| Descriptive data             | 14*     | (a) Give characteristics of study participants (eg demographic, clinical, social) and information on exposures and potential confounders<br>(b) Indicate number of participants with missing data for each variable of interest<br>(c) Summarise follow-up time (eg, average and total amount)                         | 8-9        |
| Outcome data                 | 15*     | Report numbers of outcome events or summary measures over time                                                                                                                                                                                                                                                         | 8-12       |

|    |                          |                                                                                                                  |                                                                                                                                                                                                              |       |
|----|--------------------------|------------------------------------------------------------------------------------------------------------------|--------------------------------------------------------------------------------------------------------------------------------------------------------------------------------------------------------------|-------|
| 1  | Main results             | 16                                                                                                               | (a) Give unadjusted estimates and, if applicable, confounder-adjusted estimates and their precision (eg, 95% confidence interval). Make clear which confounders were adjusted for and why they were included | 8-12  |
| 2  |                          | (b) Report category boundaries when continuous variables were categorized                                        |                                                                                                                                                                                                              |       |
| 3  |                          | (c) If relevant, consider translating estimates of relative risk into absolute risk for a meaningful time period |                                                                                                                                                                                                              |       |
| 4  | Other analyses           | 17                                                                                                               | Report other analyses done—eg analyses of subgroups and interactions, and sensitivity analyses                                                                                                               | 8-12  |
| 5  | <b>Discussion</b>        |                                                                                                                  |                                                                                                                                                                                                              |       |
| 6  | Key results              | 18                                                                                                               | Summarise key results with reference to study objectives                                                                                                                                                     | 13-18 |
| 7  | Limitations              | 19                                                                                                               | Discuss limitations of the study, taking into account sources of potential bias or imprecision. Discuss both direction and magnitude of any potential bias                                                   | 18-19 |
| 8  | Interpretation           | 20                                                                                                               | Give a cautious overall interpretation of results considering objectives, limitations, multiplicity of analyses, results from similar studies, and other relevant evidence                                   | 13-18 |
| 9  | Generalisability         | 21                                                                                                               | Discuss the generalisability (external validity) of the study results                                                                                                                                        | 13-18 |
| 10 | <b>Other information</b> |                                                                                                                  |                                                                                                                                                                                                              |       |
| 11 | Funding                  | 22                                                                                                               | Give the source of funding and the role of the funders for the present study and, if applicable, for the original study on which the present article is based                                                | 22    |

\*Give information separately for exposed and unexposed groups.

**Note:** An Explanation and Elaboration article discusses each checklist item and gives methodological background and published examples of transparent reporting. The STROBE checklist is best used in conjunction with this article (freely available on the Web sites of PLoS Medicine at <http://www.plosmedicine.org/>, Annals of Internal Medicine at <http://www.annals.org/>, and Epidemiology at <http://www.epidem.com/>). Information on the STROBE Initiative is available at <http://www.strobe-statement.org>.



# BMJ Open

## Perceptions of Medical Students Towards Online Teaching During the COVID-19 Pandemic: a national cross-sectional survey of 2721 UK medical students

|                                 |                                                                                                                                                                                                                                                                                                                                                                                                                          |
|---------------------------------|--------------------------------------------------------------------------------------------------------------------------------------------------------------------------------------------------------------------------------------------------------------------------------------------------------------------------------------------------------------------------------------------------------------------------|
| Journal:                        | <i>BMJ Open</i>                                                                                                                                                                                                                                                                                                                                                                                                          |
| Manuscript ID                   | bmjopen-2020-042378.R2                                                                                                                                                                                                                                                                                                                                                                                                   |
| Article Type:                   | Original research                                                                                                                                                                                                                                                                                                                                                                                                        |
| Date Submitted by the Author:   | 09-Oct-2020                                                                                                                                                                                                                                                                                                                                                                                                              |
| Complete List of Authors:       | Dost, Samiullah; Guy's and St Thomas' Hospitals NHS Trust<br>Hossain, Aleena; Imperial College of Science Technology and Medicine, Faculty of Medicine<br>Shehab, Mai; King's College London School of Medicine, Guy's Campus<br>Abdelwahed, Aida; Imperial College of Science Technology and Medicine, Faculty of Medicine<br>Al-Nusair, Lana; Imperial College of Science Technology and Medicine, Faculty of Medicine |
| <b>Primary Subject Heading</b>: | Medical education and training                                                                                                                                                                                                                                                                                                                                                                                           |
| Secondary Subject Heading:      | Medical education and training, Infectious diseases, Health services research, Public health                                                                                                                                                                                                                                                                                                                             |
| Keywords:                       | MEDICAL EDUCATION & TRAINING, World Wide Web technology < BIOTECHNOLOGY & BIOINFORMATICS, Telemedicine < BIOTECHNOLOGY & BIOINFORMATICS, Information technology < BIOTECHNOLOGY & BIOINFORMATICS, EDUCATION & TRAINING (see Medical Education & Training), PUBLIC HEALTH                                                                                                                                                 |
|                                 |                                                                                                                                                                                                                                                                                                                                                                                                                          |

SCHOLARONE™  
Manuscripts



I, the Submitting Author has the right to grant and does grant on behalf of all authors of the Work (as defined in the below author licence), an exclusive licence and/or a non-exclusive licence for contributions from authors who are: i) UK Crown employees; ii) where BMJ has agreed a CC-BY licence shall apply, and/or iii) in accordance with the terms applicable for US Federal Government officers or employees acting as part of their official duties; on a worldwide, perpetual, irrevocable, royalty-free basis to BMJ Publishing Group Ltd ("BMJ") its licensees and where the relevant Journal is co-owned by BMJ to the co-owners of the Journal, to publish the Work in this journal and any other BMJ products and to exploit all rights, as set out in our [licence](#).

The Submitting Author accepts and understands that any supply made under these terms is made by BMJ to the Submitting Author unless you are acting as an employee on behalf of your employer or a postgraduate student of an affiliated institution which is paying any applicable article publishing charge ("APC") for Open Access articles. Where the Submitting Author wishes to make the Work available on an Open Access basis (and intends to pay the relevant APC), the terms of reuse of such Open Access shall be governed by a Creative Commons licence – details of these licences and which [Creative Commons](#) licence will apply to this Work are set out in our licence referred to above.

Other than as permitted in any relevant BMJ Author's Self Archiving Policies, I confirm this Work has not been accepted for publication elsewhere, is not being considered for publication elsewhere and does not duplicate material already published. I confirm all authors consent to publication of this Work and authorise the granting of this licence.

1  
2  
3 **Perceptions of Medical Students Towards Online Teaching During the COVID-19 Pandemic: a**  
4 **national cross-sectional survey of 2721 UK medical students**  
5  
6

7 Samiullah Dost<sup>1\*</sup>, Aleena Hossain<sup>2\*†</sup>, Mai Shehab<sup>3</sup>, Aida Abdelwahed<sup>2</sup>, and Lana Al-Nusair<sup>2</sup>  
8  
9

- 10  
11  
12 1. *Guys and St Thomas's Hospital, London, SE11 4TX, Academic Foundation Doctor*  
13  
14 2. *Imperial College London, Sir Alexander Fleming, SW7 2AZ, Medical Student*  
15  
16 3. *King's College London, Guy's Campus, London, SE1 1UL, Medical Student*  
17  
18

19  
20  
21 \*SD and AH contributed equally to this study as joint first authors  
22

23  
24  
25 **†Contact address for corresponding author:**  
26

27 Aleena Hossain  
28

29 Imperial College London, Sir Alexander Fleming, SW7 2AZ  
30

31 [aleena.hossain16@imperial.ac.uk](mailto:aleena.hossain16@imperial.ac.uk)  
32  
33

34  
35 **Word Count:** 3969  
36  
37

38  
39 **KEYWORDS:** Medical Education & Training; Telemedicine; Information Technology; World Wide Web  
40  
41 Technology; Education & Training; Public Health  
42  
43  
44  
45  
46  
47  
48  
49  
50  
51  
52  
53  
54  
55  
56  
57  
58  
59  
60

1  
2  
3 1 **Abstract**  
4  
5  
6 2

7  
8 3 **Objectives** To investigate perceptions of medical students on the role of online teaching in facilitating  
9  
10 4 medical education during the COVID-19 pandemic

11  
12 5 **Design** Cross-sectional, online national survey

13  
14 6 **Setting** Responses collected online from 4<sup>th</sup> May to 11<sup>th</sup> May 2020 across 40 UK medical schools

15  
16 7 **Participants** Medical students across all years from UK-registered medical schools

17  
18 8 **Main outcome measures** The uses, experiences, perceived benefits and barriers of online teaching  
19  
20 9 during the COVID-19 pandemic.

21  
22  
23 10 **Results** 2721 medical students across 39 medical schools responded. Medical schools adapted to the  
24  
25 11 pandemic in different ways. The changes included the development of new distance-learning  
26  
27 12 platforms on which content was released, remote delivery of lectures using platforms and the use of  
28  
29 13 question banks and other online active recall resources. A significant difference was found between  
30  
31 14 time spent on online platforms before and during COVID-19, with 7.35% students before vs. 23.56%  
32  
33 15 students during the pandemic spending >15 hours per week ( $p<0.05$ ). The greatest perceived benefits  
34  
35 16 of online teaching platforms included their flexibility. Whereas the commonly perceived barriers to  
36  
37 17 utilising online teaching platforms included family distraction (26.76%) and poor internet connection  
38  
39 18 (21.53%).

40  
41  
42  
43 19 **Conclusions** Online teaching has enabled the continuation of medical education during these  
44  
45 20 unprecedented times. Moving forward from this pandemic, in order to maximise the benefits of both  
46  
47 21 face-to-face and online teaching and to improve the efficacy of medical education in the future, we  
48  
49 22 suggest medical schools resort to teaching formats such as team-based/problem-based learning. This  
50  
51 23 utilises online teaching platforms allowing students to digest information in their own time but also  
52  
53 24 allows students to then constructively discuss this material with peers. It has also been shown to be  
54  
55 25 effective in terms of achieving learning outcomes. Beyond COVID-19, we anticipate further  
56  
57  
58  
59  
60

1  
2  
3 26 incorporation of online teaching methods within traditional medical education. This may accompany  
4  
5 27 the observed shift in medical practice towards virtual consultations.  
6  
7  
8 28  
9

10 29 **Article Summary**  
11  
12 30  
13  
14

15 **Strengths & Limitations**

- 16 • The COVID-19 pandemic has undoubtedly impacted the delivery of medical education  
17 with a sudden shift towards online teaching platforms; to date, this is the first study  
18 investigating the perceptions of medical students on these changes.
- 19 • This study is strengthened by its collection of responses from a large national cohort of  
20 medical students from 39 out of 40 UK medical schools.
- 21 • The survey extensively explored the benefits of and barriers to online teaching methods  
22 with the potential to provide medical schools nationally with a direction for development  
23 of resources.
- 24 • Survey responses may have been subject to recall bias, and limited by timing of the study  
25 coinciding with the examination season where remote learning platforms may often be  
26 resorted to.  
27  
28

29 31  
30  
31  
32  
33  
34  
35  
36  
37  
38  
39  
40  
41  
42  
43  
44  
45  
46  
47  
48  
49  
50  
51  
52  
53  
54  
55  
56  
57  
58  
59  
60

review only

## 32 INTRODUCTION

33  
34 Since the first case of coronavirus disease 2019 (COVID-19) in the United Kingdom (UK)(1), the World  
35 Health Organisation (WHO) has declared the COVID-19 outbreak as a global pandemic(2). The  
36 nationwide lockdown restrictions to control the spread of disease and “flatten the curve” have  
37 impacted all aspects of life(3–5); inevitably, medical education has also been affected, with the halting  
38 of lectures, clinical placements, and key examinations(6,7). Such measures have resulted in a sudden  
39 shift in teaching methods towards online teaching. Online teaching has played a key role in medical  
40 education over recent years(8–10), demonstrated several benefits in enhancing student learning(11).  
41 A recent systematic review suggested that offline and online teaching are equivalent in terms of  
42 outcomes of examinations(12). Key drawbacks have also been highlighted, including time constraints  
43 to implement effective online teaching (8).

44  
45 The unprecedented COVID-19 pandemic has caused a sudden shift towards the exclusive adoption of  
46 online teaching, forming the primary source of medical education and enabling students to continue  
47 to learn remotely(13). Teaching sessions have covered key clinical conditions, case studies and  
48 examination questions via live-streamed tutorials through platforms such as Zoom(6), shown to have  
49 high levels of engagement(14). With around 19.6% of the UK medical student demographic consisting  
50 of international students(15), many of whom have returned home, this allows individuals to access  
51 teaching regardless of location(6). Nevertheless, learning relying on the internet needs to be tailored  
52 towards different learning styles to enable it to be impactful and effective(13). However, whilst the  
53 benefits to pre-clinical years of blended learning has been shown, for example in anatomical  
54 teaching(16) and especially in a generation accustomed to using YouTube(17), there is limited  
55 understanding of the impact of exclusive online teaching and its use in clinical years. Concerns have  
56 been raised regarding the quality of resources produced during the pandemic due to time constraints,  
57 particularly as these resources aim to compensate for lack of exposure(18). Indeed, a recent national

1  
2  
3 58 Twitter discussion, involving representatives from the General Medical Council (GMC), NHS England  
4  
5 59 and WHO, found that a key concern amongst students was that remote learning impacted their ability  
6  
7 60 to develop clinical competence(19). This also highlighted the potential role of the professional use of  
8  
9 61 social media in facilitating medical education, as shown in surgical training(20).  
10  
11  
12 62

13  
14 63 In the coming months, as lockdown restrictions ease, the need for social distancing will continue and  
15  
16 64 the possibility of medical students acting as vectors of COVID-19(21,22), as seen in the SARS epidemic  
17  
18 65 in Hong Kong(23), remains. Moreover, PPE shortages may form potential barriers to patient  
19  
20 66 interaction(24). Therefore, it is likely that e-learning and telemedicine will continue to form vital  
21  
22 67 sources of medical education. Many authors have suggested that digital health platforms for both  
23  
24 68 patients and students will remain an integral part of care even after the COVID-19 pandemic(25). Thus,  
25  
26 69 having a greater understanding of the perceived advantages and drawbacks will allow medical schools  
27  
28 70 to improve their delivery of online teaching. The COVID-19 pandemic has put us in a unique position  
29  
30 71 to evaluate the significance of online teaching platforms in medical education. Whilst many students  
31  
32 72 have acknowledged the impact of COVID-19 on their education(6,21) and explored their role during  
33  
34 73 the pandemic(26,27), to date no study has investigated the outlook of medical students on the effect  
35  
36 74 of these changes. Therefore, we aimed to investigate their perceptions on the role of online teaching  
37  
38 75 in facilitating their education during the COVID-19 pandemic. Improving our understanding of this  
39  
40 76 could help develop medical school curricula in the future.  
41  
42  
43  
44  
45  
46  
47  
48  
49  
50  
51  
52  
53  
54  
55  
56  
57  
58  
59  
60

## 78 **METHODOLOGY**

### 79 80 **Questionnaire design and distribution**

81 This was a cross-sectional study conducted on a national level via an online survey. A 20-item  
82 questionnaire was devised following a literature search on current online teaching methods and the  
83 effects of COVID-19 on medical education in the UK (Appendix I). Questions exploring the experiences  
84 of online teaching were based on sections I-IV of the Dundee Ready Education Environment Measure  
85 (DREEM)(28), a validated questionnaire designed to measure the educational environment of medical  
86 schools and healthcare professionals(29). These were 5-point Likert-type questions, ranging from  
87 strongly disagree to strongly agree. The remaining items in the questionnaire comprised a mixture of  
88 question styles. Certain questions were conditional. Open-ended text responses were also collected  
89 and underwent thematic analysis whereby responses were categorised. The question items were  
90 initially drafted and informally discussed with a group of medical students before undergoing a careful  
91 review and editing process. The final questions explored the following three themes:

- 92 1. General demographics
- 93 2. The use and experience of online teaching during the COVID-19 pandemic
- 94 3. Perceived benefits and barriers of online teaching

95  
96 The survey was created using Qualtrics, an online survey software (Version XM, 2019, Provo, UT(30)),  
97 and distributed by medical students recruited nationally via social media, with an interest in sharing a  
98 national survey, in order to maximise outreach to all 40 registered UK medical schools(31). The survey  
99 was accessible via an anonymous link and open for a one-week period (04/05/20–11/05/20).

100

### 101 **Participants**

102 All 42,190 undergraduate and graduate entry medical students(32) across all years (years 1-5 and  
103 intercalated year) from 40 registered UK medical schools(31) were eligible to participate.

104



1  
2  
3 **105 Patient and Public Involvement**  
4

5 106

7 107 As this study focused on medical students, patients or the general public were not involved in the  
8  
9  
10 108 study design. However, medical students were involved with the piloting of the survey as well as its  
11  
12 109 distribution across medical schools.  
13

14 110

16 **111 Participant consent and ethical considerations**  
17

18  
19 112 Participation was voluntary, and participants were informed prior to starting the survey that all data  
20  
21 113 collected was non-identifiable and would only be used for research purposes. A mandatory selection  
22  
23 114 box consenting to participation and confirming that that this was the first time completing this survey  
24  
25 115 was included at the beginning of the survey, ensuring a 100% consent rate and preventing multiple  
26  
27  
28 116 responses. Ethical approval was requested from Imperial College London and was deemed not to be  
29  
30 117 required as all data was anonymised, with informed consent taken from all participants.  
31

32 118

34 **119 Data analysis**  
35

36  
37 120 Data was exported from Qualtrics to Microsoft Excel (Excel version 16.29, 2019). Qualtrics and  
38  
39 121 GraphPad Prism (Prism version 8.2.1, 2019) were both used to generate graphs and calculate  
40  
41 122 descriptive statistics for the survey responses to explore patterns in responses. Multiple responses  
42  
43 123 were accounted for by identifying unique IP addresses.  
44

45 124

46  
47  
48 125 Wilcoxon test was used to compare hours of online teaching usage before and during COVID-19  
49  
50 126 overall, whilst Mann-Whitney U test was utilised in a sub-group analysis comparing usage between  
51  
52 127 pre-clinical and clinical students. These were conducted following the Shapiro-Wilk and Kolmogorov-  
53  
54 128 Smirnov normality tests which found the data set to be non-gaussian in distribution. *P*-values <0.05  
55  
56  
57 129 were considered statistically significant.  
58  
59  
60

130 **RESULTS**

131

132 **Cohort demographics**

133 Of the 2721 responses collected, 68.06% (n=1852) of respondents were female, 31.53% (n=858) were  
 134 male, and 0.40% (n=11) identified as other, contrasting against the population of UK medical students,  
 135 which comprises of 55% females and 45% males(32). Responses were collected from 39 medical  
 136 schools across the UK, from medical students across all years (Table 1). Due to the inability to track  
 137 the survey distribution, it was not possible to calculate a response rate. However, non-response bias  
 138 was minimised by ensuring the survey was shared by a variety of medical students via a range of  
 139 platforms.

**Table 1.** A table outlining the demographics (gender, university, and year of medical school) of students responding to the survey (n=2721).

| Demographic                                           |                                                                 | Proportion of students, % (n) |
|-------------------------------------------------------|-----------------------------------------------------------------|-------------------------------|
| Gender                                                | Male                                                            | 31.53 (858)                   |
|                                                       | Female                                                          | 68.06 (1852)                  |
|                                                       | Other                                                           | 0.40 (11)                     |
| University                                            | University of Aberdeen School of Medicine and Dentistry         | 1.76 (48)                     |
|                                                       | Anglia Ruskin University School of Medicine                     | 2.21 (60)                     |
|                                                       | Aston University Medical School                                 | 0.07 (2)                      |
|                                                       | Barts and The London School of Medicine and Dentistry           | 6.39 (174)                    |
|                                                       | University of Birmingham College of Medical and Dental Sciences | 1.76 (48)                     |
|                                                       | Brighton and Sussex Medical School                              | 0.44 (12)                     |
|                                                       | University of Bristol Medical School                            | 3.20 (87)                     |
|                                                       | University of Buckingham Medical School                         | 0.77 (21)                     |
|                                                       | University of Cambridge School of Clinical Medicine             | 1.29 (35)                     |
|                                                       | Cardiff University School of Medicine                           | 9.22 (251)                    |
|                                                       | University of Dundee School of Medicine                         | 0.40 (11)                     |
|                                                       | The University of Edinburgh Medical School                      | 0.44 (12)                     |
|                                                       | University of Exeter Medical School                             | 2.06 (56)                     |
|                                                       | University of Glasgow School of Medicine                        | 0.70 (19)                     |
|                                                       | Hull York Medical School                                        | 3.86 (105)                    |
|                                                       | Imperial College London Faculty of Medicine                     | 3.93 (107)                    |
|                                                       | Keele University School of Medicine                             | 0.85 (23)                     |
| Kent and Medway Medical School                        | 0.04 (1)                                                        |                               |
| King's College London GKT School of Medical Education | 10.11 (275)                                                     |                               |
| Lancaster University Medical School                   | 0.15 (4)                                                        |                               |
| University of Leeds School of Medicine                | 4.96 (135)                                                      |                               |

140

|    |      |                                                                 |             |
|----|------|-----------------------------------------------------------------|-------------|
| 1  |      |                                                                 |             |
| 2  |      |                                                                 |             |
| 3  |      |                                                                 |             |
| 4  |      | University of Leicester Medical School                          | 2.87 (78)   |
| 5  |      | University of Liverpool School of Medicine                      | 8.38 (228)  |
| 6  |      | University of Manchester Medical School                         | 4.52 (123)  |
| 7  |      | Newcastle University School of Medical Education                | 3.34 (91)   |
| 8  |      | Norwich Medical School                                          | 7.02 (191)  |
| 9  |      | University of Nottingham School of Medicine                     | 3.31 (90)   |
| 10 |      | University of Nottingham - Lincoln Medical School               | 0.07 (2)    |
| 11 |      | University of Oxford Medical Sciences Division                  | 2.24 (61)   |
| 12 |      | Plymouth University Peninsula Schools of Medicine and Dentistry | 0.55 (15)   |
| 13 |      | Queen's University Belfast School of Medicine                   | 0.92 (25)   |
| 14 |      | University of Sheffield Medical School                          | 0.99 (27)   |
| 15 |      | University of Southampton School of Medicine                    | 1.98 (54)   |
| 16 |      | University of St Andrews School of Medicine                     | 0.33 (9)    |
| 17 |      | St George's, University of London                               | 2.46 (67)   |
| 18 |      | University of Sunderland School of Medicine                     | 0.00 (0)    |
| 19 |      | Swansea University Medical School                               | 0.11 (3)    |
| 20 |      | University of Central Lancashire School of Medicine             | 1.73 (47)   |
| 21 |      | University College London Medical School                        | 2.46 (67)   |
| 22 |      | University of Warwick Medical School                            | 2.09 (57)   |
| 23 |      |                                                                 |             |
| 24 | Year | Pre-clinical Year 1                                             | 23.19 (631) |
| 25 |      | Pre-clinical Year 2                                             | 19.85 (540) |
| 26 |      | Year 3                                                          | 27.20 (740) |
| 27 |      | Penultimate Clinical Year                                       | 20.62 (561) |
| 28 |      | Final Clinical Year                                             | 4.52 (123)  |
| 29 |      | Intercalating                                                   | 4.63 (126)  |

141

142

143 **Student engagement with online teaching platforms**

144

145 Prior to the pandemic, students spent an average of 4-6 hours per week using online teaching

146 platforms. Students used a combination of video tutorials (27.71%), online question banks (26.18%),

147 pre-recorded tutorials via their respective medical schools (20.96%) and online flashcards (15.99%).

148 4.46% of students utilised live tutorials via online platforms from their medical school, while 1.79%

149 used live tutorials from other sources (Figure 1). Other resources included the use of Anatomy TV,

150 online notes such as Pulsenotes or TeachMeAnatomy, Acland's Anatomy videos, revision websites e.g.

151 OSCE Stop and Zero To Finals, NICE guidelines, online textbooks and UpToDate, and BMJ Best Practice.

152

153 Students then ranked the effectiveness of online teaching platforms with 1 being most effective and

154 5 being least effective. According to the responses by the students, video tutorials e.g.

155 YouTube/Osmosis appeared to be the most effective, followed by online question banks, and live

1  
2  
3 156 tutorials, whilst students commented using a variety of other sources. However, following sub-analysis  
4  
5 157 and exclusion of intercalating students, unlike pre-clinical students, clinical students found live  
6  
7 158 tutorials to be the most effective, although rankings for the remaining platforms were similar.  
8  
9

10 159  
11  
12 160 During the pandemic, students spent an average of 7-10 hours using online teaching platforms,  
13  
14 161 compared to 4-6 hours prior to the pandemic. The difference in hours prior to and during the COVID-  
15  
16 162 19 pandemic were found to be significant ( $p<0.05$ ). Similar numbers of students spent <1 hour on  
17  
18 163 online teaching platforms before and during the pandemic. However, there was an increase in  
19  
20 164 numbers of students spending longer periods of time on online teaching platforms, for example 7.35%  
21  
22 165 (n=200) vs. 19.70% (n=641) of students spent >15 hours on online teaching platforms before and  
23  
24 166 during the pandemic (Figure 2A). Following sub-analysis, before the pandemic, clinical and pre-clinical  
25  
26 167 students spent similar times on online teaching (Figure 2Bi), whereas during the pandemic differences  
27  
28 168 in periods were found to be significant ( $p<0.001$ ) (Figure 2Bii), with a greater proportion of pre-clinical  
29  
30 169 students spending >15 hours (28.69% vs. 20.01%). 57.28% of students reported that they were now  
31  
32 170 taking examinations remotely; the remaining reported having postponed or cancelled examinations.  
33  
34  
35  
36

37 171

### 38 172 **Medical school adaptations to COVID-19**

39 173

40  
41  
42  
43 174 Medical schools adapted to the pandemic in a combination of ways with 28.48% of students reporting  
44  
45 175 their medical school to adapting to remote learning through the delivery of live tutorials via online  
46  
47 176 platforms. Moreover, 42.19% of students reported that their medical school either introduced new  
48  
49 177 resources to existing learning platforms or created a new online teaching platform with new  
50  
51 178 resources. Other medical schools have either a) not implemented anything as the curriculum had  
52  
53 179 already been covered, or b) delayed teaching with the introduction of a question bank.  
54  
55  
56

57 180  
58  
59  
60

1  
2  
3 181 The online teaching provided as an alternative by the medical schools followed a pre-set curriculum  
4  
5 182 for 66.12% (n=1799) of students, was designed following student requests for 3.38% (n=92) of  
6  
7 183 students, or using a combination of both for 30.50% (n=830) of students. This shows that student  
8  
9 184 opinion was considered in the delivery of online teaching.  
10  
11  
12 185

13  
14 186 Furthermore, 59.73% of students found that online teaching sessions have been interactive, with  
15  
16 187 students finding the opportunity to interact via the chat box or by directly speaking to the lecturer.  
17  
18 188 Some students have also specified that having small group sizes, group discussions, online case  
19  
20 189 simulations and quizzes have been useful in increasing their engagement.  
21  
22  
23 190

#### 24 191 **Student perception of online teaching**

25  
26 192  
27  
28 193 Students ranked their experience of online teaching using a Likert scale with 1 being strongly disagree  
29  
30 194 and 5 being strongly agree (Table 2). Overall, students did not find online teaching to be engaging or  
31  
32 195 enjoyable, with limited opportunities to ask questions. Furthermore, on average students were  
33  
34 196 neutral when asked whether online teaching should be more interactive, but did not find it as effective  
35  
36 197 as face-to-face teaching.  
37  
38  
39  
40  
41 198

42  
43 **Table 2.** A table displaying students' perceptions on their experiences of online teaching,  
44 ranked on a Likert scale from 1-5, where 1=strongly disagree and 5=strongly agree. Likert  
45 scores have been shown as mean  $\pm$  standard deviation ( $\pm$ SD)

| Statement                                                            | Mean | $\pm$ SD |
|----------------------------------------------------------------------|------|----------|
| The teaching is often stimulating                                    | 2.75 | 1.18     |
| I find it easy to engage in the lesson                               | 2.55 | 1.30     |
| I feel able to ask the questions I want                              | 2.70 | 1.53     |
| I enjoy the online teaching                                          | 2.62 | 1.37     |
| I would like the online teaching to be more interactive              | 3.04 | 1.44     |
| I feel that online teaching is as effective as face-to-face teaching | 1.92 | 1.45     |
| I prefer online teaching to face-to-face teaching                    | 1.69 | 1.48     |
| The teachers are well prepared for the teaching sessions             | 3.36 | 1.42     |
| I feel I am being well prepared for my profession                    | 2.28 | 1.33     |
| My internet connection can be problematic                            | 2.53 | 1.74     |

57 199  
58 200  
59  
60

1  
2  
3 201 The main advantages of online teaching appeared to be that it saves students time on travelling  
4  
5 202 (19.82%), provides flexibility (19.52%), the ability for students to learn at their own pace (18.63%), it  
6  
7 203 is more comfortable (15.84%), and it cuts costs (14.24%) (Figure 3A). Other medical students (n=82)  
8  
9  
10 204 also commented that it provides time efficiency, allows more time for students to focus on  
11  
12 205 preparing for clinical placements, reduces anxiety, and being able to be in a different country.  
13

14 206

16 207 On the other hand, students stated that family distractions (26.76%), internet connection (21.53%),  
17  
18 208 timing of tutorials (17.31%), anxiety (11.08%), and lack of space (11.03%) as barriers to effective online  
19  
20 209 teaching (Figure 3B). Students (n=81) commented on experiencing a lack of motivation, difficulty  
21  
22 210 concentrating and asking questions, and a lack of contact with colleagues as further limitations.  
23  
24

25 211

## 27 212 **Role of online teaching in clinical teaching**

28 213

30 214 75.99% (n=1842) of medical students felt that online teaching had not successfully replaced the clinical  
31  
32 215 teaching they received via direct patient contact, with 82.17% (n=1986) feeling they cannot learn  
33  
34 216 practical clinical skills through online teaching. This shows that clinical skills remain a pertinent barrier  
35  
36 217 to online teaching of medical students.  
37  
38  
39  
40  
41  
42  
43  
44  
45  
46  
47  
48  
49  
50  
51  
52  
53  
54  
55  
56  
57  
58  
59  
60

1  
2  
3 218 **DISCUSSION**  
4

5 219

7 220 **Background**

9  
10 221 With the rise of COVID-19, it is unsurprising that many medical institutions have resorted to online  
11  
12 222 education platforms. However, online education has been used preceding this pandemic. Here, we  
13  
14 223 discuss how this pandemic has shaped the use of online teaching currently as well as its application in  
15  
16 224 the future of medical education.  
17

18  
19 225

21 226 **The impact of COVID-19 on uptake of online teaching**

23  
24 227 Our study found a significant increase in the time spent on online teaching platforms before and  
25  
26 228 during the pandemic ( $p<0.05$ ), particularly amongst pre-clinical students. This was expected, as the  
27  
28 229 primary source of education and engagement of students with their medical school was online, in  
29  
30 230 addition to the pre-existing use of online teaching resources. This is despite the reported cancellation  
31  
32 231 of clinical examinations and conversion of written examinations into open book, which would arguably  
33  
34 232 reduce student engagement. Hence, the cancellation of clinical examinations may have accounted for  
35  
36 233 the greater proportion of pre-clinical students engaging with online teaching for more than 15 hours,  
37  
38 234 which is greater than that of clinical students.  
39

40 236 The development of innovative educational projects has been initiated to enhance remote medical  
41  
42 237 education(19). A rise in external resources and teaching programmes such as Osmosis, BiteMedicine,  
43  
44 238 Becoming A Doctor and Sustaining Medical education in a Lockdown Environment (SMILE) has allowed  
45  
46 239 many teaching sessions to be available to medical students across the country. Hence, students may  
47  
48 240 learn from a wider community of professionals. However, the high flow of resources causes a  
49  
50 241 proliferation of choice which may increase burnout rates. Schwartz claimed that this choice overload  
51  
52 242 is due to the failure of universities on fulfilling their education role to their students(33,34). Yet,  
53  
54 243 although some platforms were created to facilitate learning during lockdown (e.g. SMILE), many  
55  
56  
57  
58  
59  
60

1  
2  
3 244 diverse medical education platforms available existed prior to the pandemic with increasing usage,  
4  
5 245 which may suggest that students desire this flexible curriculum.  
6  
7  
8 246

9  
10 247 Our results suggest that students would like online teaching sessions to be more interactive. This could  
11  
12 248 be achieved via student response systems incorporating methods such as polls, quizzes or breakout  
13  
14 249 rooms(35)(36), which have been shown to encourage student participation(37). Indeed, previous  
15  
16 250 literature suggests the incorporation of online Q&A sessions to improve student engagement(13),  
17  
18 251 based on a previous model advising the use of synchronous learning(38). Synchronous learning is  
19  
20 252 defined as a social learning environment alongside answering questions live(39). This active  
21  
22 253 communication between lecturers and students allows ambiguous concepts to be addressed  
23  
24 254 immediately to increase student involvement, creating a more active learning environment. Indeed,  
25  
26  
27  
28 255

### 29 30 256 **Student perception of online teaching**

31  
32 257 Students scored their experiences of online compared to face-to-face teaching to be lower, with an  
33  
34 258 average of 1.69 scored for preference for online teaching, and 2.55 for engagement in lessons (Table  
35  
36 259 2), suggesting most students prefer face-to-face teaching. Furthermore, previous studies utilizing the  
37  
38 260 DREEM survey found higher average scores for educational environments(40–42). The discrepancies  
39  
40 261 found may have been due to students comparing their current experiences to previous face-to-face  
41  
42 262 teaching. However, given that students are currently solely limited to online teaching, responses may  
43  
44 263 not truly reflect the efficacy of online teaching. Nevertheless, as online teaching has become  
45  
46 264 mainstream, it is paramount to analyse its efficacy compared to previous methods for further  
47  
48 265 development.  
49  
50  
51  
52 266

53  
54 267 Furthermore, unlike teaching evaluated by DREEM previously, the current pandemic caused a sudden  
55  
56 268 shift towards the use of online teaching on a large scale, allowing for inconsistencies with  
57  
58 269 underdeveloped medical curricula, many teachers being inadequately prepared and technical  
60



1  
2  
3 270 difficulties(8). Therefore, the low scores of student experiences may be due to the unexpected,  
4  
5 271 sudden introduction of online teaching. Despite the relatively high score of 3.36 for teacher  
6  
7 272 preparation(40–47), the quality of the sessions delivered may have been impacted by several factors  
8  
9  
10 273 such as poor internet connection, family distractions and the timing of the tutorials, as demonstrated  
11  
12 274 by our results. In the future, medical schools must carefully build an infrastructure comprising of  
13  
14 275 technologically versatile lecturers to deliver well-organised, succinct tutorials, games and resources,  
15  
16 276 especially given the lack of awareness of “conscientious online lecture design” amongst medical  
17  
18 277 educators(48).  
19

20  
21 278

22  
23 279 The low score of 2.28 for being “well prepared for my profession” (Table 2), compared to previous  
24  
25 280 studies reporting up to 3.18(41,43,46,47,49), is striking, mirroring concerns that remote or online  
26  
27 281 teaching may compromise the clinical competence and confidence of students(19). The loss of  
28  
29 282 immediate feedback may have contributed to this, as generally students and doctors prefer face-to-  
30  
31 283 face sessions for communication(50) and feedback purposes(51). Nonetheless, it is important to note  
32  
33 284 that students often do not feel completely prepared for their profession(52).  
34  
35

36 285

37  
38  
39 286 Moreover, overall video tutorials (e.g. YouTube or Osmosis), were ranked as the most effective online  
40  
41 287 resources, compared to live tutorials, particularly for pre-clinical students. Reasons for this may  
42  
43 288 include the short, organized and aesthetic nature of pre-recorded videos(53). In comparison, live  
44  
45 289 tutorials tend to be longer, face technical difficulties and are less engaging. Despite these challenges,  
46  
47  
48 290 live tutorials were perceived to be the most effective by clinical students. This may be due to the  
49  
50 291 sessions’ synchronous nature, allowing for real time discussions to occur, reflecting clinical practice.  
51

52 292

53  
54 293 Notably, in this study, distinctions between the different forms of online teaching were not made  
55  
56 294 when investigating students’ perceptions. Rather, it was an evaluation of online teaching as a whole,  
57  
58 295 which may have impacted the results, as teaching modalities are often specific to the topic being  
59  
60

1  
2  
3 296 taught(48). Furthermore, student preferences may depend on the purpose of engaging with  
4  
5 297 resources, for example for learning new content versus revision(54), or for short-term versus long-  
6  
7 298 term knowledge retention(55).  
8

9  
10 299

### 11 300 **Benefits and barriers of online teaching**

12  
13  
14 301

15  
16 302 To students, the main advantages of online teaching are the time and money saved from the lack of  
17  
18 303 travel, its flexibility and the ability for students to learn at their own pace (Figure 3A). Further benefits  
19  
20 304 of live online lectures(14) include opportunities for students to anonymously ask and answer  
21  
22 305 questions, potentially encouraging further engagement from those who would not otherwise  
23  
24 306 participate in a live lecture, due to the less intimidating environment online(56). However, these  
25  
26 307 benefits may not be applicable to all forms of online teaching. For example, the limited synchronous  
27  
28 308 aspects of pre-recorded content may deter students due to the lack of opportunities to interact with  
29  
30 309 lecturers(57). Also, watching pre-recorded lectures, alongside the possibility of attending face-to-face  
31  
32 310 lecture, has been shown to negatively correlate with learning success(58).  
33  
34  
35

36  
37 311

38  
39 312 The main barriers to online teaching appear to be family distractions, internet connection and the  
40  
41 313 timing of tutorials (Figure 3B). This may disadvantage students with large families or with limited  
42  
43 314 internet access. Moreover, the mental health of students, recently shown to be impacted by the  
44  
45 315 COVID-19 pandemic(59), may be adversely affected as indicated by the free text responses. This may  
46  
47 316 be, in part, attributed to the lack of interaction with friends and colleagues leading to a rise in anxiety.  
48  
49 317 Alternatively, with exams being open book and with an unrestricted setting, students may be less  
50  
51 318 prone to exam anxiety(60). Although, this does not address the family and noise disturbances which  
52  
53 319 may still affect exam performance.  
54  
55

56  
57 320

### 58 321 **Medical student role during the COVID-19 pandemic**

1  
2  
3 322  
4  
5 323 On the other hand, medical students are being asked to 'step-up' and join the front-line of doctors  
6  
7 324 tackling COVID-19(61). As well as the early graduation of UK medical students(62), many universities  
8  
9 325 have given their students the opportunity to volunteer. For example, the University of Birmingham  
10  
11 326 has facilitated for over 700 medical students to volunteer in the NHS(27). Although medical schools  
12  
13 327 have halted clinical placements, this opportunity could provide more exposure, undoubtedly  
14  
15 328 impacting the development of medical students. However, for those who are not volunteering due to  
16  
17 329 living with vulnerable family members or having health conditions themselves, this would then put  
18  
19 330 them at a disadvantage as their peers continue to gain clinical exposure.  
20  
21  
22

23 331  
24  
25 332 As lockdown restrictions ease and students slowly return to medical school, clinical placements may  
26  
27 333 incorporate more virtual aspects as healthcare evolves(22). Indeed, new platforms have been  
28  
29 334 developed by the NHS (e.g. NHS NearMe) which have shown that video consultations are better than  
30  
31 335 telephone consultations in reducing medical error and improving patient outcomes(31). However,  
32  
33 336 Professor Martin Marshall, chairman of the RCGP, has highlighted that most consultations are still  
34  
35 337 taking place over the phone as opposed to video calls(63). This may be subject to change with a  
36  
37 338 demographic who are increasingly familiar with the use of the internet. Additionally, in Germany,  
38  
39 339 online platforms as observed in Dermatology may "provide a safe and efficient alternative for face-to-  
40  
41 340 face outpatient care"(25), abiding by social distancing rules.  
42  
43  
44  
45

46 341

#### 47 342 **Future direction of online teaching**

48 343

49  
50  
51 344 Furthermore, the digitalisation of medical teaching could play a significant role in the future of medical  
52  
53 345 schools. Allowing users to tailor their learning and acquire new skills through the chaotic nature of an  
54  
55 346 amplitude of resources could halt the development of medical students. Having discussed benefits of  
56  
57 347 both face-to-face and remote teaching as well as the future of healthcare online, we suggest that in  
58  
59  
60

1  
2  
3 348 order to maximise the benefits of these learning methods, a mixture of online and in-person teaching  
4  
5 349 should be utilised moving forward. This can be incorporated into an effective learning method such  
6  
7 350 as problem-based learning (PBL) or team-based learning (TBL) which have been shown to improve  
8  
9 351 learning outcomes(64,65), student motivation and understanding(66). Students are set online  
10  
11 352 materials to study and are then are expected to discuss content in person in a group tutorial(67). This  
12  
13  
14 353 allows students to study at their own pace, in a manner suitable to them, while also holding them  
15  
16 354 accountable for their own learning. While students find PBL sessions to be interactive and to improve  
17  
18 355 self-directed learning(68,69), TBL has been found to be more engaging and “conducive to learning” in  
19  
20  
21 356 pre-clinical settings, due to smaller groups, ensuring timely tutor feedback(70).  
22

23 357  
24  
25 358 Compared to face-to-face teaching, students in this study felt less satisfied with online teaching and  
26  
27 359 ill-prepared for their profession. With many of these students due to graduate as doctors in the next  
28  
29 360 few years, this is concerning, highlighting the need for medical schools to improve their delivery of  
30  
31 361 medical education given that online teaching is here to stay. Hence, we suggest that until innovative  
32  
33 362 solutions are generated, medical schools adopt TBL or PBL learning styles for efficiently delivering  
34  
35 363 high-yielded teaching.  
36  
37  
38

39 364

#### 40 41 365 **Limitations and Future work**

42 366  
43  
44  
45 367 This is the first study to look at the impact of COVID-19 on online teaching across the UK, with  
46  
47 368 responses from 39/40 medical schools. One of the strengths of this study is its large sample size of  
48  
49 369 2792 medical student across all pre-clinical and clinical years. Furthermore, the recruitment of a range  
50  
51 370 of medical students for survey distribution via a range of methods minimised potential response bias.  
52  
53 371 However, this study also had some limitations. Some medical schools may have been  
54  
55 372 disproportionately represented with larger numbers of responses from some schools e.g. Kings  
56  
57 373 College London, compared to newer medical schools such as Aston or Kent, potentially skewing results  
58  
59  
60

1  
2  
3 374 due to sample bias. Additionally, 68.06% of participants were female, in comparison to 55% of UK  
4  
5 375 medical students who are female(32); thus, the results may not be generalisable to the medical  
6  
7 376 student population. Further, some aspects of this survey depended on participants' memory perhaps  
8  
9 377 influencing their reporting, introducing elements of recall bias. The survey did not evaluate the various  
10  
11 378 ways different content may have been taught e.g. online lectures, games, or question banks;  
12  
13 379 perceptions of game-based online anatomy teaching would have differed from online didactic lectures  
14  
15 380 on immunology. Thus, we cannot truly evaluate the types of online teaching provided. Also, it is  
16  
17 381 important to note that the period covered is usually when students have examinations, hence  
18  
19 382 students may have been spending more time on online teaching platforms regardless. In addition,  
20  
21 383 since this survey, medical schools may have updated their online resources. Lastly, student receptivity  
22  
23 384 to PBL/TBL methods should have been evaluated. To truly measure the impact of COVID-19 on student  
24  
25 385 utilisation of online teaching, a more in-depth, qualitative analysis such as focus groups conducted in  
26  
27 386 collaboration with medical schools is required to gather more accurate results, such as the effects on  
28  
29 387 examination performance.  
30  
31  
32  
33  
34  
35  
36  
37  
38  
39  
40  
41  
42  
43  
44  
45  
46  
47  
48  
49  
50  
51  
52  
53  
54  
55  
56  
57  
58  
59  
60

### 389 **Author Contributions**

390 SD contributed to the study concept and design, and developed the questionnaire. SD recruited  
391 collaborators for survey distribution and data collection. SD supervised the project, had full access to  
392 the data, controlled the decision to publish, and accepts full responsibility for the conduct of this  
393 study, as the guarantor. AH and SD contributed equally to this study as joint first authors. AH  
394 developed and designed the questionnaire, contributed to data acquisition and interpretation, writing  
395 and critical revision of the manuscript. AH is the corresponding author and managed project  
396 administration. MS developed the questionnaire, contributed to data acquisition and interpretation,  
397 and writing and critical revision of the manuscript. AA developed the questionnaire, and contributed  
398 to data visualisation and presentation, and writing and critical revision of the manuscript. LA  
399 performed data analysis, interpretation, visualisation and presentation, and contributed to writing  
400 and critical revision of the manuscript. All authors approved the final version to be published and are  
401 accountable for all aspects of the work. Sixteen students were involved with survey distribution and  
402 data collection.

403

### 404 **Acknowledgements**

405 We thank Bonita Sinartio, Shweta Madhusudanan, Harri Gruffydd Jones, Victoria Selwyn, Rebecca  
406 Conway-Jones, Aqsa Javed, Esmée Nourizadeh, Jack Alan Tagg, Ayshia Bibi, Hyacyntha Celine Hazna  
407 Imelda, Sonya Gibson, Kauther Al-Kaaby, Sharma Kansal, Muzammil Ali Khan, Haya Maki, and Maryam  
408 Goralwalla, for their assistance in distributing the survey link and collecting data. We would also like  
409 to express our gratitude to our supervisor, Dr Samiullah Dost, for his guidance and support throughout  
410 the course of this study.

411

412

### 413 **Copyright**

414

1  
2  
3 415 I, the Submitting Author has the right to grant and does grant on behalf of all authors of the Work (as  
4  
5 416 defined in the below author licence), an exclusive licence for contributions from authors who are: i)  
6  
7 417 UK Crown employees; ii) where BMJ has agreed a CC BY licence shall apply, and/or iii) in accordance  
8  
9 418 with the terms applicable for US Federal Government officers or employees acting as part of their  
10  
11 419 official duties; on a worldwide, perpetual, irrevocable, royalty-free basis to BMJ Publishing Group Ltd  
12  
13 420 (“BMJ”) its licensees and where the relevant Journal is co-owned by BMJ to the co-owners of the  
14  
15 421 Journal, to publish the Work in BMJ Open and any other BMJ products and to exploit all rights, as set  
16  
17 422 out in our licence.  
18  
19  
20  
21  
22

23 424 The Submitting Author accepts and understands that any supply made under these terms is made by  
24  
25 425 BMJ to the Submitting Author unless you are acting as an employee on behalf of your employer or a  
26  
27 426 postgraduate student of an affiliated institution which is paying any applicable article publishing  
28  
29 427 charge (“APC”) for Open Access articles. Where the Submitting Author wishes to make the Work  
30  
31 428 available on an Open Access basis (and intends to pay the relevant APC), the terms of reuse of such  
32  
33 429 Open Access shall be governed by a Creative Commons licence – details of these licences and which  
34  
35 430 Creative Commons licence will apply to this Work are set out in our licence referred to above.  
36  
37  
38  
39  
40

#### 41 432 **Competing Interests**

42  
43 433 All authors have completed the ICMJE Unified Competing Interest form (available on request from the  
44  
45 434 corresponding author) and declare: no support from any organisation for the submitted work; no  
46  
47 435 financial relationships with any organisations that might have an interest in the submitted work in the  
48  
49 436 previous three years, no other relationships or activities that could appear to have influenced the  
50  
51 437 submitted work.  
52  
53  
54  
55

56 438

#### 57 439 **Data sharing**

58  
59  
60

1  
2  
3 440 Raw data are available upon request from the corresponding author ([ah2716@ic.ac.uk](mailto:ah2716@ic.ac.uk)). Due to the  
4  
5 441 anonymous nature of the survey, it was not possible to disseminate the results of this study to the  
6  
7 442 participants.  
8  
9

10 443

11  
12 444 **Transparency statement**

13  
14 445 The lead author confirms that the manuscript is an honest, accurate, and transparent account of the  
15  
16 446 study; no important aspects of the study have been omitted; and any discrepancies from the study as  
17  
18 447 originally planned have been explained.  
19  
20

21 448

22  
23 449 **Ethical approval**

24  
25 450 Ethical approval was requested from Imperial College London and was deemed not to be required as  
26  
27 451 all data was anonymised, with informed consent taken from all participants. The work was carried out  
28  
29 452 in accordance with the Declaration of Helsinki, including, but not limited to the anonymity of  
30  
31 453 participants being guaranteed and the informed consent of participants being obtained.  
32  
33

34 454

35  
36 455 **Funding**

37  
38  
39 456 This research received no specific grant from any funding agency in the public, commercial or not-  
40 457 for-profit sectors.  
41  
42  
43  
44  
45  
46  
47  
48  
49  
50  
51  
52  
53  
54  
55  
56  
57  
58  
59  
60



458 **References**

- 459 1. Moss P, Barlow G, Easom N, et al. Lessons for managing high-consequence infections from  
460 first COVID-19 cases in the UK. *The Lancet*. [Online] 2020;395(10227): E46. Available from:  
461 doi:10.1016/S0140-6736(20)30463-3
- 462 2. World Health Organisation. *WHO announces COVID-19 outbreak a pandemic*. [Online] World  
463 Health Organisation. Available from: [http://www.euro.who.int/en/health-topics/health-](http://www.euro.who.int/en/health-topics/health-emergencies/coronavirus-covid-19/news/news/2020/3/who-announces-covid-19-outbreak-a-pandemic)  
464 [emergencies/coronavirus-covid-19/news/news/2020/3/who-announces-covid-19-outbreak-](http://www.euro.who.int/en/health-topics/health-emergencies/coronavirus-covid-19/news/news/2020/3/who-announces-covid-19-outbreak-a-pandemic)  
465 [a-pandemic](http://www.euro.who.int/en/health-topics/health-emergencies/coronavirus-covid-19/news/news/2020/3/who-announces-covid-19-outbreak-a-pandemic) [Accessed: 31st May 2020]
- 466 3. Johnson B. *PM address to the nation on coronavirus: 23 March 2020*. [Online] GOV.UK.  
467 Available from: [https://www.gov.uk/government/speeches/pm-address-to-the-nation-on-](https://www.gov.uk/government/speeches/pm-address-to-the-nation-on-coronavirus-23-march-2020)  
468 [coronavirus-23-march-2020](https://www.gov.uk/government/speeches/pm-address-to-the-nation-on-coronavirus-23-march-2020) [Accessed: 29th May 2020]
- 469 4. Hancock M. *Controlling the spread of COVID-19: Health Secretary's statement to Parliament*.  
470 [Online] GOV.UK. Available from: [https://www.gov.uk/government/speeches/controlling-](https://www.gov.uk/government/speeches/controlling-the-spread-of-covid-19-health-secretarys-statement-to-parliament)  
471 [the-spread-of-covid-19-health-secretarys-statement-to-parliament](https://www.gov.uk/government/speeches/controlling-the-spread-of-covid-19-health-secretarys-statement-to-parliament) [Accessed: 31st May  
472 2020]
- 473 5. Stevens S, Pritchard A. *Letter to chief executives of all NHS trusts and foundation trusts, CCG*  
474 *accountable officers, GP practices and primary care networks, and providers of community*  
475 *health services*. [Online] NHS England and NHS Improvement. Available from:  
476 [https://www.england.nhs.uk/coronavirus/wp-content/uploads/sites/52/2020/03/urgent-](https://www.england.nhs.uk/coronavirus/wp-content/uploads/sites/52/2020/03/urgent-next-steps-on-nhs-response-to-covid-19-letter-simon-stevens.pdf)  
477 [next-steps-on-nhs-response-to-covid-19-letter-simon-stevens.pdf](https://www.england.nhs.uk/coronavirus/wp-content/uploads/sites/52/2020/03/urgent-next-steps-on-nhs-response-to-covid-19-letter-simon-stevens.pdf) [Accessed: 29th May 2020]
- 478 6. Sandhu P, de Wolf M. The impact of COVID-19 on the undergraduate medical curriculum.  
479 *Medical Education Online*. [Online] 2020;25(1). Available from:  
480 doi:10.1080/10872981.2020.1764740
- 481 7. General Medical Council. *Information for medical students*. [Online] General Medical Council.  
482 Available from: [https://www.gmc-uk.org/news/news-archive/coronavirus-information-and-](https://www.gmc-uk.org/news/news-archive/coronavirus-information-and-advice/information-for-medical-students)  
483 [advice/information-for-medical-students](https://www.gmc-uk.org/news/news-archive/coronavirus-information-and-advice/information-for-medical-students) [Accessed: 27th May 2020]

- 1  
2  
3 484 8. O'Doherty D, Dromey M, Loughheed J, et al. Barriers and solutions to online learning in  
4  
5 485 medical education - An integrative review. *BMC Medical Education*. [Online] 2018;18: 130.  
6  
7 486 Available from: doi:10.1186/s12909-018-1240-0  
8  
9  
10 487 9. Harden RM. Trends and the future of postgraduate medical education. *Emergency Medicine*  
11  
12 488 *Journal*. [Online] 2006;23(10): 798–802. Available from: doi:10.1136/emj.2005.033738  
13  
14 489 10. Moran J, Briscoe G, Peglow S. Current Technology in Advancing Medical Education:  
15  
16 490 Perspectives for Learning and Providing Care. *Academic Psychiatry*. [Online] 2018;42: 796–  
17  
18 491 799. Available from: doi:10.1007/s40596-018-0946-y  
19  
20  
21 492 11. Lochner L, Wieser H, Waldboth S, et al. Combining traditional anatomy lectures with e-  
22  
23 493 learning activities: how do students perceive their learning experience? *International journal*  
24  
25 494 *of medical education*. [Online] 2016;7: 69–74. Available from: doi:10.5116/ijme.56b5.0369  
26  
27  
28 495 12. Pei L, Wu H. Does online learning work better than offline learning in undergraduate medical  
29  
30 496 education? A systematic review and meta-analysis. *Medical Education Online*. [Online] 2019;  
31  
32 497 Available from: doi:10.1080/10872981.2019.1666538  
33  
34 498 13. Evans DJR, Bay BH, Wilson TD, et al. Going Virtual to Support Anatomy Education: A STOP  
35  
36 499 GAP in the Midst of the Covid-19 Pandemic. *Anatomical sciences education*. [Online]  
37  
38 500 2020;13(3): 279–283. Available from: doi:10.1002/ase.1963  
39  
40  
41 501 14. Kay D, Pasarica M. Using technology to increase student (and faculty satisfaction with)  
42  
43 502 engagement in medical education. *Advances in physiology education*. [Online] 2019;43(3):  
44  
45 503 408–413. Available from: doi:10.1152/advan.00033.2019  
46  
47  
48 504 15. Universities UK International. *INTERNATIONAL FACTS AND FIGURES 2019*. [Online]  
49  
50 505 Universities UK International. Available from:  
51  
52 506 [https://www.universitiesuk.ac.uk/International/Documents/2019/International\\_facts\\_and](https://www.universitiesuk.ac.uk/International/Documents/2019/International_facts_and_figures_slides.pdf)  
53  
54 507 [figures\\_slides.pdf](https://www.universitiesuk.ac.uk/International/Documents/2019/International_facts_and_figures_slides.pdf) [Accessed: 30th May 2020]  
55  
56  
57 508 16. Khalil MK, Abdel Meguid EM, Elkhider IA. Teaching of anatomical sciences: A blended learning  
58  
59 509 approach. *Clinical Anatomy*. [Online] 2018;31(3): 323–329. Available from:  
60

- 1  
2  
3 510 doi:10.1002/ca.23052  
4  
5 511 17. Barry DS, Marzouk F, Chulak-Oglu K, et al. Anatomy education for the YouTube generation.  
6  
7 512 *Anatomical Sciences Education*. [Online] 2016;9(1): 90–96. Available from:  
8  
9 513 doi:10.1002/ase.1550  
10  
11 514 18. Longhurst GJ, Stone DM, Dulohery K, et al. Strength, Weakness, Opportunity, Threat (SWOT)  
12  
13 515 Analysis of the Adaptations to Anatomical Education in the United Kingdom and Republic of  
14  
15 516 Ireland in Response to the COVID-19 Pandemic. *Anatomical sciences education*. [Online]  
16  
17 517 2020;13(3): 301–311. Available from: doi:10.1002/ase.1967  
18  
19 518 19. Huddart D, Hirniak J, Sethi R, et al. #Med StudentCovid – How social media is supporting  
20  
21 519 students during COVID-19. *Medical Education*. [Online] 2020; Available from:  
22  
23 520 doi:10.1111/medu.14215  
24  
25 521 20. Gallo G, Sturiale A, De Simone V, et al. Epistemic Networks on Twitter: A New Way To Learn.  
26  
27 522 *Journal of Investigative Surgery*. [Online] 2019; Available from:  
28  
29 523 doi:10.1080/08941939.2019.1656787  
30  
31 524 21. Ahmed H, Allaf M, Elghazaly H. *COVID-19 and medical education*. [Online] The Lancet  
32  
33 525 Infectious Diseases. 2020. Available from: doi:10.1016/S1473-3099(20)30226-7  
34  
35 526 22. Rose S. Medical Student Education in the Time of COVID-19. *JAMA*. [Online] 2020;323(21):  
36  
37 527 2131–2132. Available from: doi:10.1001/jama.2020.5227  
38  
39 528 23. Wong TW, Lee CK, Tam W, et al. Cluster of SARS among Medical Students Exposed to Single  
40  
41 529 Patient, Hong Kong. *Emerging Infectious Diseases*. [Online] 2004;10(2): 269–276. Available  
42  
43 530 from: doi:10.3201/eid1002.030452  
44  
45 531 24. Roberts M. *Coronavirus: Has the NHS got enough PPE?*. [Online] BBC News. Available from:  
46  
47 532 <https://www.bbc.co.uk/news/health-52254745> [Accessed: 31st May 2020]  
48  
49 533 25. Reinholz M, French LE. Medical education and care in dermatology during the SARS-CoV2  
50  
51 534 pandemic: challenges and chances. *Journal of the European Academy of Dermatology and*  
52  
53 535 *Venereology : JEADV*. [Online] 2020;34(5): e214–e216. Available from: doi:10.1111/jdv.16391  
54  
55  
56  
57  
58  
59  
60

- 1  
2  
3 536 26. Baker DM, Bhatia S, Brown S, et al. Medical student involvement in the COVID-19 response.  
4  
5 537 *The Lancet*. [Online] 2020;395(10232): 1254. Available from: doi:10.1016/S0140-  
6  
7 538 6736(20)30795-9  
8  
9  
10 539 27. Watson A, McKinnon T, Prior SD, et al. COVID-19: time for a bold new strategy for medical  
11  
12 540 education. *Medical Education Online*. [Online] 2020;25(1). Available from:  
13  
14 541 doi:10.1080/10872981.2020.1764741  
15  
16 542 28. Roff S, McAleer S, Harden RM, et al. Development and validation of the Dundee Ready  
17  
18 543 Education Environment Measure (DREEM). *Medical Teacher*. [Online] 1997;19(4): 295–299.  
19  
20 544 Available from: doi:10.3109/01421599709034208  
21  
22  
23 545 29. Miles S, Swift L, Leinster SJ. The Dundee Ready Education Environment Measure (DREEM): A  
24  
25 546 review of its adoption and use. *Medical Teacher*. [Online] 2012;34: e620–e634. Available  
26  
27 547 from: doi:10.3109/0142159X.2012.668625  
28  
29  
30 548 30. Qualtrics. *Qualtrics*. [Online] Provo, Utah, USA; 2019. Available from:  
31  
32 549 <https://www.qualtrics.com>  
33  
34  
35 550 31. Medical Schools Council. *Medical Schools A-Z*. [Online] Available from:  
36  
37 551 <https://www.medschools.ac.uk/studying-medicine/medical-schools> [Accessed: 28th May  
38  
39 552 2020]  
40  
41 553 32. General Medical Council. *The state of medical education and practice in the UK*. [Online] 2019  
42  
43 554 [Accessed: 20th August 2020]. Available from: [https://www.gmc-uk.org/-](https://www.gmc-uk.org/-/media/documents/the-state-of-medical-education-and-practice-in-the-uk---workforce-report_pdf-80449007.pdf)  
44  
45 555 [/media/documents/the-state-of-medical-education-and-practice-in-the-uk---workforce-](https://www.gmc-uk.org/-/media/documents/the-state-of-medical-education-and-practice-in-the-uk---workforce-report_pdf-80449007.pdf)  
46  
47 556 [report\\_pdf-80449007.pdf](https://www.gmc-uk.org/-/media/documents/the-state-of-medical-education-and-practice-in-the-uk---workforce-report_pdf-80449007.pdf) [Accessed: 20th August 2020]  
48  
49  
50 557 33. Schwartz B. The Tyranny of Choice. *Scientific American*. [Online] 2004;290(4): 70–75.  
51  
52 558 Available from: doi:10.1038/scientificamerican0404-70  
53  
54  
55 559 34. Ackerman DS, Gross BL. How many choices are good? Measurement of the effects of course  
56  
57 560 choice on perceptions of a marketing option. *Journal of Marketing Education*. [Online]  
58  
59 561 2006;28(1): 69–80. Available from: doi:10.1177/0273475305284642  
60

- 1  
2  
3 562 35. McBrien JL, Jones P, Cheng R. Virtual spaces: Employing a synchronous online classroom to  
4  
5 563 facilitate student engagement in online learning. *International Review of Research in Open*  
6  
7 564 *and Distance Learning*. [Online] 2009;10(3). Available from: doi:10.19173/irrodl.v10i3.605  
8  
9  
10 565 36. Muir S, Tirlea L, Elphinstone B, et al. Promoting Classroom Engagement Through the Use of  
11  
12 566 an Online Student Response System: A Mixed Methods Analysis. *Journal of Statistics*  
13  
14 567 *Education*. [Online] 2020;28(1): 25–31. Available from: doi:10.1080/10691898.2020.1730733  
15  
16 568 37. Morawo A, Sun C, Lowden M. Enhancing engagement during live virtual learning using  
17  
18 569 interactive quizzes. *Medical Education*. [Online] 2020; Available from:  
19  
20 570 doi:10.1111/medu.14253  
21  
22  
23 571 38. Chen NS, Ko HC, Kinshuk, et al. A model for synchronous learning using the Internet.  
24  
25 572 *Innovations in Education and Teaching International*. [Online] 2005;42(2): 181–194. Available  
26  
27 573 from: doi:10.1080/14703290500062599  
28  
29  
30 574 39. Hrastinski S. Asynchronous & Synchronous E-Learning. *EDUCAUSE Quarterly*. [Online] 2008;4.  
31  
32 575 Available from: <https://er.educause.edu/-/media/files/article-downloads/eqm0848.pdf>  
33  
34 576 [Accessed: 28th May 2020]  
35  
36  
37 577 40. Prashanth GP, Ismail SK. The Dundee Ready Education Environment Measure: A prospective  
38  
39 578 comparative study of undergraduate medical students' and interns' perceptions in Oman.  
40  
41 579 *Sultan Qaboos University Medical Journal*. [Online] 2018;18(2): e173–e181. Available from:  
42  
43 580 doi:10.18295/squmj.2018.18.02.009  
44  
45  
46 581 41. Miles S, Leinster SJ. Medical students' perceptions of their educational environment:  
47  
48 582 Expected versus actual perceptions. *Medical Education*. [Online] 2007;41(3): 265–272.  
49  
50 583 Available from: doi:10.1111/j.1365-2929.2007.02686.x  
51  
52  
53 584 42. Patil AA, Chaudhari VL. Students' perception of the educational environment in medical  
54  
55 585 college: a study based on DREEM questionnaire. *Korean journal of medical education*.  
56  
57 586 [Online] 2016;28(3): 281–288. Available from: doi:10.3946/kjme.2016.32  
58  
59 587 43. Dunne F, McAleer S, Roff S. Assessment of the undergraduate medical education  
60

- 1  
2  
3 588 environment in a large UK medical school. *Health Education Journal*. [Online] 2006;65(2):  
4  
5 589 149–158. Available from: doi:10.1177/001789690606500205  
6  
7  
8 590 44. Palés J, Gual A, Escanero J, et al. Educational climate perception by preclinical and clinical  
9  
10 591 medical students in five Spanish medical schools. *International journal of medical education*.  
11  
12 592 [Online] 2015;6: 65–75. Available from: doi:10.5116/ijme.5557.25f9  
13  
14 593 45. Demiroren M, Palaoglu O, Kemahli S, et al. Perceptions of Students in Different Phases of  
15  
16 594 Medical Education of Educational Environment: Ankara University Faculty of Medicine.  
17  
18 595 *Medical Education Online*. [Online] 2008;13: 8. Available from: doi:10.3402/meo.v13i.4477  
19  
20  
21 596 46. Dreyer A, Gibbs A, Smalley S, et al. Clinical associate students' perception of the educational  
22  
23 597 environment at the university of the witwatersrand, Johannesburg. *African Journal of Primary*  
24  
25 598 *Health Care and Family Medicine*. [Online] 2015;7(1): 778. Available from:  
26  
27 599 doi:10.4102/phcfm.v7i1.778  
28  
29  
30 600 47. Riquelme A, Oporto M, Oporto J, et al. Measuring students' perceptions of the educational  
31  
32 601 climate of the new curriculum at the Pontificia Universidad Católica de Chile: Performance of  
33  
34 602 the Spanish translation of the Dundee Ready Education Environment Measure (DREEM).  
35  
36 603 *Education for Health: Change in Learning and Practice*. 2009;22(1): 112.  
37  
38  
39 604 48. Tang B, Coret A, Qureshi A, et al. Online lectures in undergraduate medical education:  
40  
41 605 Scoping review. *Journal of Medical Internet Research*. [Online] 2018;4(1): e11. Available from:  
42  
43 606 doi:10.2196/mededu.9091  
44  
45  
46 607 49. Finn Y, Avalos G, Dunne F. Positive changes in the medical educational environment following  
47  
48 608 introduction of a new systems-based curriculum: DREEM or reality? Curricular change and  
49  
50 609 the Environment. *Irish Journal of Medical Science*. [Online] 2014;183(2): 253–258. Available  
51  
52 610 from: doi:10.1007/s11845-013-1000-4  
53  
54  
55 611 50. Paechter M, Maier B. Online or face-to-face? Students' experiences and preferences in e-  
56  
57 612 learning. *Internet and Higher Education*. [Online] 2010;13: 292–297. Available from:  
58  
59 613 doi:10.1016/j.iheduc.2010.09.004  
60

- 1  
2  
3 614 51. Ifediora CO. Online Medical Education for Doctors: Identifying Potential Gaps to the  
4  
5 615 Traditional, Face-to-Face Modality. *Journal of Medical Education and Curricular Development*.  
6  
7 616 [Online] 2019;6: 1–8. Available from: doi:10.1177/2382120519827912  
8  
9  
10 617 52. Monrouxe L V., Grundy L, Mann M, et al. How prepared are UK medical graduates for  
11  
12 618 practice? A rapid review of the literature 2009-2014. *BMJ Open*. [Online] 2017;7(1). Available  
13  
14 619 from: doi:10.1136/bmjopen-2016-013656  
15  
16 620 53. Guo PJ, Kim J, Rubin R. How video production affects student engagement: An empirical  
17  
18 621 study of MOOC videos. *L@S 2014 - Proceedings of the 1st ACM Conference on Learning at*  
19  
20 622 *Scale*. [Online] 2014. Available from: doi:10.1145/2556325.2566239  
21  
22  
23 623 54. Wynter L, Burgess A, Kalman E, et al. Medical students: What educational resources are they  
24  
25 624 using? *BMC Medical Education*. [Online] 2019;19(36). Available from: doi:10.1186/s12909-  
26  
27 625 019-1462-9  
28  
29  
30 626 55. Rondon S, Sassi FC, Furquim De Andrade CR. Computer game-based and traditional learning  
31  
32 627 method: A comparison regarding students' knowledge retention. *BMC Medical Education*.  
33  
34 628 [Online] 2013;13: 30. Available from: doi:10.1186/1472-6920-13-30  
35  
36  
37 629 56. Ya Ni A. Comparing the Effectiveness of Classroom and Online Learning: Teaching Research  
38  
39 630 Methods. *Journal of Public Affairs Education*. 2013;19(2): 199–215.  
40  
41 631 57. Keis O, Grab C, Schneider A, et al. Online or face-to-face instruction? A qualitative study on  
42  
43 632 the electrocardiogram course at the University of Ulm to examine why students choose a  
44  
45 633 particular format. *BMC Medical Education*. [Online] 2017;17: 194. Available from:  
46  
47 634 doi:10.1186/s12909-017-1053-6  
48  
49  
50 635 58. Zureick AH, Burk-Rafel J, Purkiss JA, et al. The interrupted learner: How distractions during  
51  
52 636 live and video lectures influence learning outcomes. *Anatomical Sciences Education*. [Online]  
53  
54 637 2018;11(4): 366–376. Available from: doi:10.1002/ase.1754  
55  
56  
57 638 59. Cao W, Fang Z, Hou G, et al. The psychological impact of the COVID-19 epidemic on college  
58  
59 639 students in China. *Psychiatry Research*. [Online] 2020;287. Available from:  
60

- 1  
2  
3 640 doi:10.1016/j.psychres.2020.112934  
4  
5 641 60. Stowell J, Bennett D. Effects of online testing on student exam performance and test anxiety.  
6  
7 642 *Journal of Educational Computing Research*. [Online] 2010;42(2): 161–171. Available from:  
8  
9 643 doi:10.2190/EC.42.2.b  
10  
11 644 61. Mahase E. Covid-19: medical students to be employed by NHS as part of epidemic response.  
12  
13 645 *BMJ (Clinical research ed.)*. [Online] 2020;368: m1156. Available from:  
14  
15 646 doi:10.1136/bmj.m1156  
16  
17 647 62. British Medical Association. *COVID-19: early provisional registration for final year students*.  
18  
19 648 [Online] BMA - COVID-19. Available from: [https://www.bma.org.uk/advice-and-](https://www.bma.org.uk/advice-and-support/covid-19/returning-to-the-nhs-or-starting-a-new-role/covid-19-early-provisional-registration-for-final-year-students)  
20  
21 649 [support/covid-19/returning-to-the-nhs-or-starting-a-new-role/covid-19-early-provisional-](https://www.bma.org.uk/advice-and-support/covid-19/returning-to-the-nhs-or-starting-a-new-role/covid-19-early-provisional-registration-for-final-year-students)  
22  
23 650 [registration-for-final-year-students](https://www.bma.org.uk/advice-and-support/covid-19/returning-to-the-nhs-or-starting-a-new-role/covid-19-early-provisional-registration-for-final-year-students) [Accessed: 28th May 2020]  
24  
25 651 63. Lynch P, Wainwright D. *Coronavirus: How GPs have stopped seeing most patients in person*.  
26  
27 652 [Online] BBC News. Available from: <https://www.bbc.co.uk/news/uk-england-52216222>  
28  
29 653 [Accessed: 31st May 2020]  
30  
31 654 64. Yew EHJ, Goh K. Problem-Based Learning: An Overview of its Process and Impact on Learning.  
32  
33 655 *Health Professions Education*. [Online] 2016;2(2): 75–79. Available from:  
34  
35 656 doi:10.1016/j.hpe.2016.01.004  
36  
37 657 65. Clark CE. Problem-based learning: How do the outcomes compare with traditional teaching?  
38  
39 658 *British Journal of General Practice*. [Online] 2006;56(530): 722–723. Available from:  
40  
41 659 <https://www.ncbi.nlm.nih.gov/pmc/articles/PMC1876647/> [Accessed: 30th May 2020]  
42  
43 660 66. Klegeris A, Hurren H. Impact of problem-based learning in a large classroom setting: Student  
44  
45 661 perception and problem-solving skills. *American Journal of Physiology - Advances in*  
46  
47 662 *Physiology Education*. [Online] 2011;35: 408–415. Available from:  
48  
49 663 doi:10.1152/advan.00046.2011  
50  
51 664 67. Chang BJ. Problem-based learning in medical school: A student’s perspective. *Annals of*  
52  
53 665 *Medicine and Surgery*. [Online] 2016;12: 88–89. Available from:  
54  
55  
56  
57  
58  
59  
60



- 1  
2  
3 666 doi:10.1016/j.amsu.2016.11.011  
4  
5 667 68. Yadav RL, Piryani RM, Deo GP, et al. Attitude and perception of undergraduate medical  
6  
7 668 students toward the problem-based learning in Chitwan Medical College, Nepal. *Advances in*  
8  
9 669 *Medical Education and Practice*. [Online] 2018;4(9): 317–322. Available from:  
10  
11 670 doi:10.2147/amep.s160814  
12  
13  
14 671 69. Al-Drees AA, Khalil MS, Irshad M, et al. Students' perception towards the problem based  
15  
16 672 learning tutorial session in a system-based hybrid curriculum. *Saudi Medical Journal*. [Online]  
17  
18 673 2015;36(3): 341–348. Available from: doi:10.15537/smj.2015.3.10216  
19  
20  
21 674 70. Burgess A, Bleasel J, Haq I, et al. Team-based learning (TBL) in the medical curriculum: Better  
22  
23 675 than PBL? *BMC Medical Education*. [Online] 2017;17: 243. Available from:  
24  
25 676 doi:10.1186/s12909-017-1068-z  
26  
27  
28 677  
29  
30  
31  
32  
33  
34  
35  
36  
37  
38  
39  
40  
41  
42  
43  
44  
45  
46  
47  
48  
49  
50  
51  
52  
53  
54  
55  
56  
57  
58  
59  
60

1  
2  
3 678 **Figure Legends**  
4

5 679  
6

7 680 **Figure 1.** Students were asked about the different types of online teaching platforms they used before  
8 the COVID-19 pandemic as represented by this bar chart (n=2721). Options included live tutorial by  
9 the medical school, live tutorial by other sources, online question banks, online/digital flashcards, pre-  
10 681 recorded lectures/tutorials, video tutorials e.g. YouTube, none, or other).  
11  
12 682  
13  
14 683  
15

16 684

17  
18 685 **Figure 2.** Students were asked the approximate number of hours spent on online teaching platforms  
19 before and during the COVID-19 pandemic (n=2721). A – A bar graph comparing the number of hours  
20 686 spent on online platforms before and during the COVID-19 pandemic by students overall. A Wilcoxon  
21 687 test was then conducted which found the difference to be significant ( $p < 0.05$ ). B i - A bar graph  
22 comparing the number of hours spent on online platforms by pre-clinical and clinical students before  
23 688 the COVID-19 pandemic. B ii - A bar graph comparing the number of hours spent on online platforms  
24 by pre-clinical and clinical students during the COVID-19 pandemic. A Mann-Whitney U test found the  
25 689 difference in time spent between the students during the COVID-19 pandemic to be significant  
26 690 ( $p < 0.001$ ).  
27  
28 691  
29  
30 692  
31  
32 693  
33  
34 694  
35  
36 695  
37  
38 696  
39  
40 697  
41  
42 698  
43  
44 699  
45  
46 700  
47  
48  
49  
50  
51  
52  
53  
54  
55  
56  
57  
58  
59  
60

695 **Figure 3.** A bar chart outlining the advantages of and barriers to online teaching. A – Students were  
696 provided with a list of potential ways in which online teaching was advantageous and they were asked  
697 to select all which applied to them. They were also given the option to input their own statements  
698 (n=2721). B – Students were provided with a list of potential barriers to the benefits they may receive  
699 from online teaching and they were asked to select all which applied to them. They were also given  
700 the option to input their own statements (n=2721).



**Figure 1.** Students were asked about the different types of online teaching platforms they used before the COVID-19 pandemic as represented by this bar chart (n=2721). Options included live tutorials by the medical school, live tutorials by other sources, online question banks, online/digital flashcards, pre-recorded lectures/tutorials, video tutorials e.g. Youtube, none, or other).

A

### Number of hours spent on online platforms before and during COVID-19 pandemic

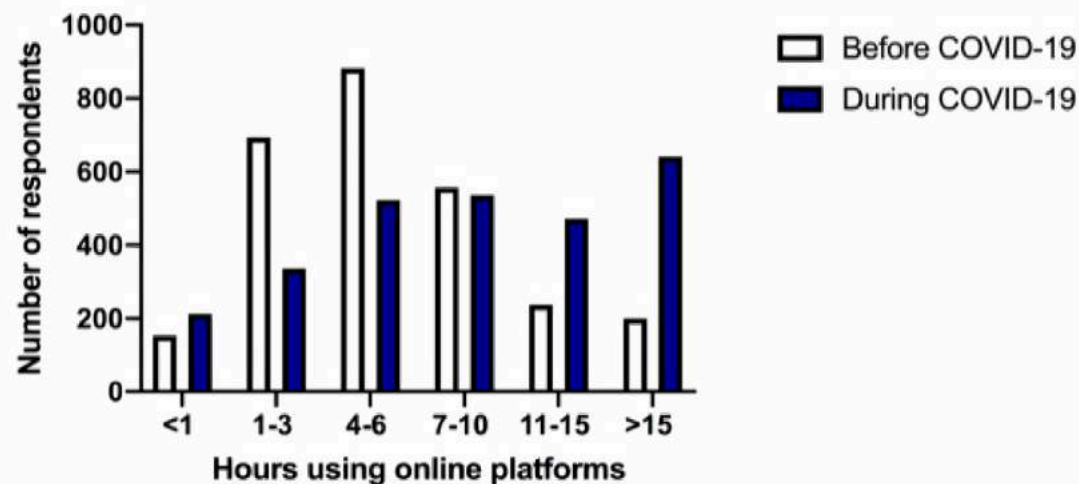

B i

### Number of hours spent on online platforms by pre-clinical vs clinical students before COVID-19 pandemic

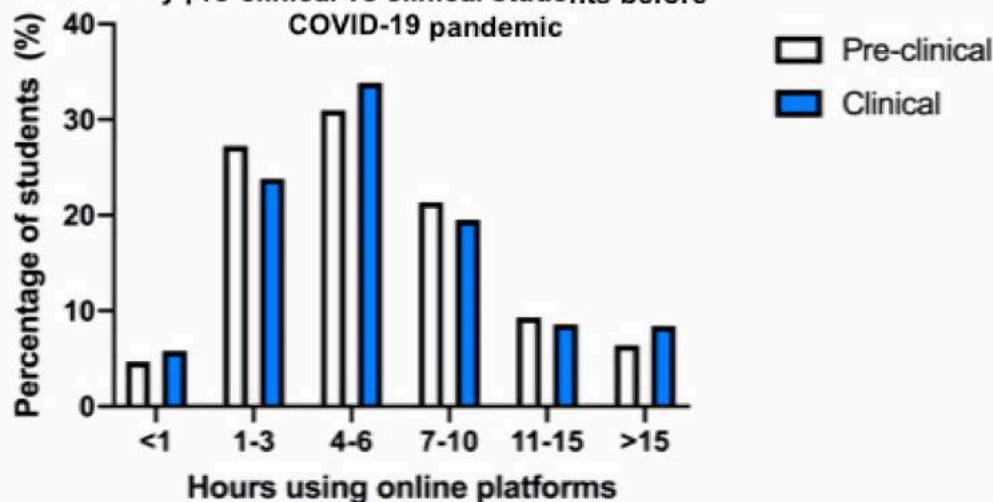

B ii

### Number of hours spent on online platforms by pre-clinical vs clinical students during COVID-19 pandemic

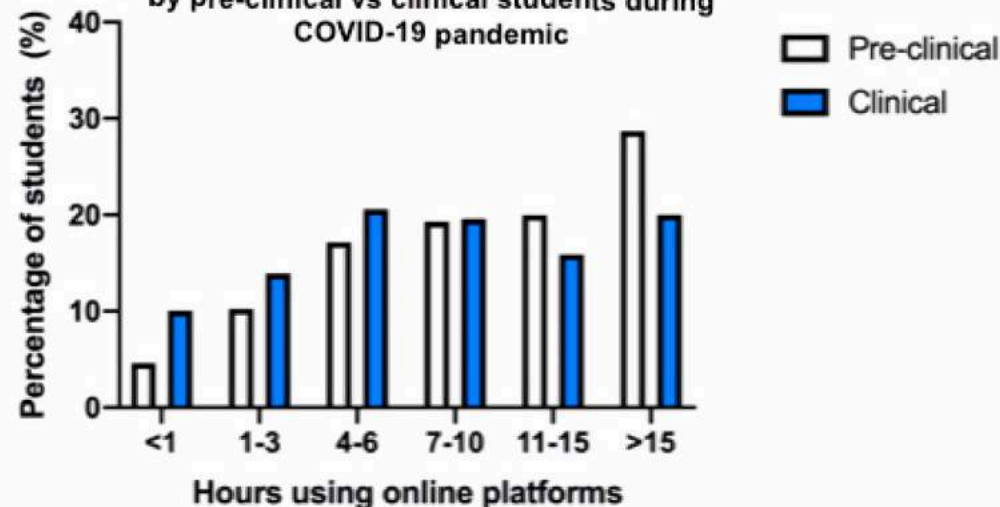

**Figure 2.** Students were asked the approximate number of hours spent on online teaching platforms before and during the COVID-19 pandemic (n=2721). A – A bar graph comparing the number of hours spent on online platforms before and during the COVID-19 pandemic by students overall. A Wilcoxon test was then conducted which found the difference to be significant ( $p<0.05$ ). B i - A bar graph comparing the number of hours spent on online platforms by pre-clinical and clinical students before the COVID-19 pandemic. B ii - A bar graph comparing the number of hours spent on online platforms by pre-clinical and clinical students during the COVID-19 pandemic. A Mann-Whitney U test found the difference in time spent between the students during the COVID-19 pandemic to be significant ( $p<0.001$ ).

A

B

### Frequency of responses to the different advantages of online teaching



### Frequency of responses to the different advantages of online teaching

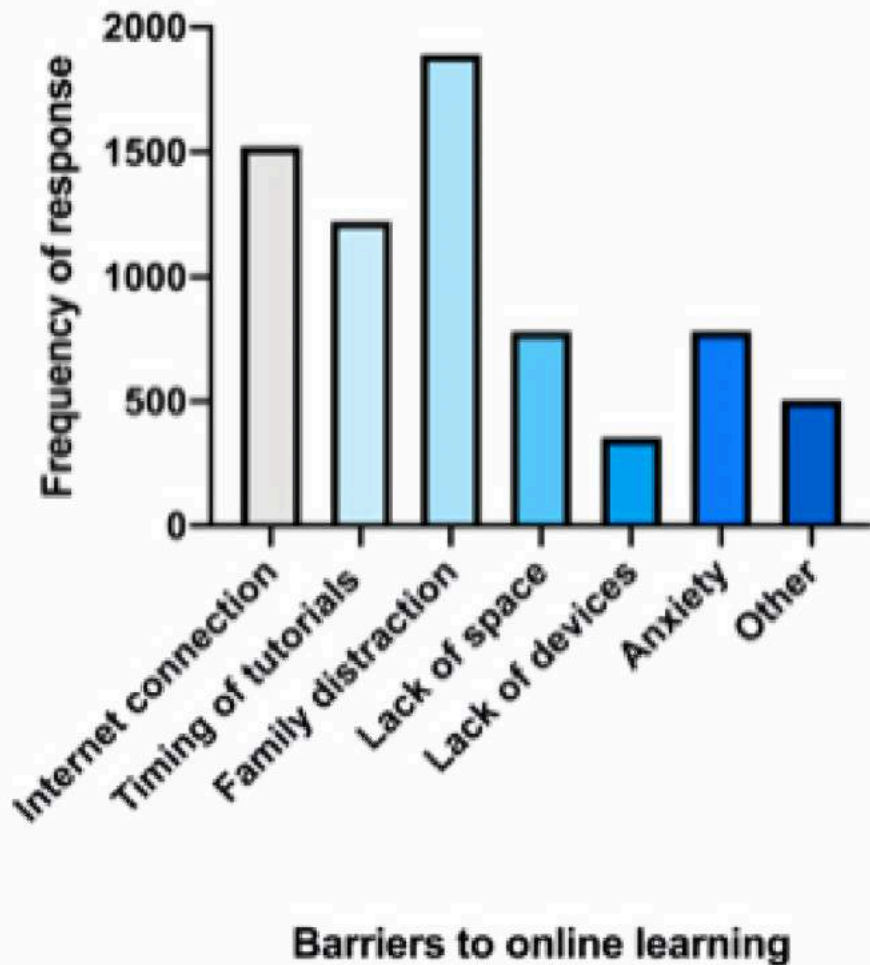

**Figure 3.** A bar chart outlining the advantages of and barriers to online teaching. **A-** Students were provided with a list of potential ways in which online teaching was advantageous and they were asked to select all which applied to them. They were also given the option to input their own statements (n=2721). **B-** Students were provided with a list of potential barriers to the benefits they may receive from online teaching and they were asked to select all which applied to them. They were also given the option to input their own statements (n=2721).

## Appendix

### Appendix I – Online Questionnaire

#### **Covid-19, Online Learning & Medical Education**

Thank you for your interest in completing our short survey investigating the role of online learning in facilitating medical education during the Covid-19 pandemic in the UK. The data collected is **non-identifiable** and will be used for research purposes.

This survey will close on Monday 11th May at 10pm.

Please tick the box to proceed:

I consent to my information being used for research purposes and this is my first time completing this survey.

Survey Code:

#### **Background**

1. Which UK Medical School do you attend?

2. What year are you in?

3. What is your gender?

## Online Learning & Medical Education

4. Prior to the Covid-19 pandemic, which online learning platforms/resources did you engage with? (Please select all which apply)

Video tutorials e.g. Youtube/Osmosis

Live tutorials via Zoom/similar platforms by **Medical School**

Live tutorials via Zoom/similar platforms by **other sources**

Online question banks

Online/Digital Flashcards e.g. Brainscape, Anki

Pre-recorded tutorials via Medical School specific online learning platform

None

Other - please specify

5. Which method of online learning do you find the most effective? Please rank the following methods from 1-5 (1=most effective, 5=least effective)

Video tutorials e.g. Youtube/Osmosis

Live tutorials via Zoom/similar platforms

Online question banks

Online/Digital Flashcards e.g. Brainscape, Anki

Other - please specify:

1  
2  
3  
4 6. Prior to the Covid-19 pandemic, how many hours per week did  
5 you spend on average on online learning?  
6  
7

8

9  
10  
11 7. During the current Covid-19 pandemic, how has your medical  
12 school adapted teaching for your year? (Please select all which  
13 apply)  
14  
15

16  Introduced a new online learning platform with new resources

17  Introduced new resources to an existing online learning platform

18  Delivered live tutorials via Zoom/similar platforms

19  Delivered pre-recorded tutorials

20  Other - please specify:

21

22  
23  
24  
25  
26  
27  
28  
29  
30  
31  
32  
33 8. Are these online teaching sessions interactive?  
34  
35

36  Yes

37  No

38  Majority are

39  Majority are not

40  
41  
42  
43  
44  
45  
46  
47 8b. What makes your teaching sessions interactive? (Please  
48 select all which apply)  
49  
50

51  Opportunity to interact via chat box

52  Opportunity to interact via speech

53  Live quiz  
54  
55  
56  
57  
58  
59  
60



Other - please specify:

9. Does the online learning follow a pre-set curriculum, or is it based on student requests?

- Pre-set curriculum
- Student requests
- Combination of both

10. During the current Covid-19 pandemic, how many hours per week do you spend on average on online learning?

### Student Perceptions of Online Learning

11. Please rank the following statements on your experience of online learning from 1-5 (1=Strongly disagree, 5 = Strongly agree)

0                      1                      2                      3                      4                      5

The teaching is often stimulating

I find it easy to engage in the lesson

I feel able to ask the questions I want

I enjoy the online teaching

1  
2  
3  
4  
5  
6  
7  
8  
9  
10  
11  
12  
13  
14  
15  
16  
17  
18  
19  
20  
21  
22  
23  
24  
25  
26  
27  
28  
29  
30  
31  
32  
33  
34  
35  
36  
37  
38  
39  
40  
41  
42  
43  
44  
45  
46  
47  
48  
49  
50  
51  
52  
53  
54  
55  
56  
57  
58  
59  
60

I would like the online teaching to be more interactive

I feel that online teaching is as effective as face-face teaching

I prefer online teaching to face-face teaching

The teachers are well prepared for the teaching sessions

I feel I am being well prepared for my profession

My internet connection can be problematic

12. What aspects of online learning do you enjoy? (Please select all which apply)

|                                       |                                                       |
|---------------------------------------|-------------------------------------------------------|
| <input type="checkbox"/> No travel    | <input type="checkbox"/> Ability to ask questions     |
| <input type="checkbox"/> Cost savings | <input type="checkbox"/> More comfortable             |
| <input type="checkbox"/> Interactive  | <input type="checkbox"/> Ability to learn at own pace |

Flexibility

Other - please specify:

13. What do you feel are the barriers to online learning? (Please select all which apply)

Internet connection

Lack of space

Timing of tutorials

Lack of devices

Family distractions

Anxiety

Other - please specify:

### Role of Online Learning in Clinical Teaching

14a. Do you feel online learning has successfully replaced the clinical teaching you receive from direct patient contact?

Yes  
 No  
 Yes, to some extent  
 N/A

14b. Do you feel able to learn practical clinical skills through online learning?

Yes  
 No  
 Yes, to some extent  
 N/A

15. Have your examinations been affected by Covid-19?

Yes

No

N/A

1  
2  
3  
4 15b. How have your written examinations been affected?  
5  
6

- 7 ✓  
8 Written exams will take place remotely online  
9 Written exams have been postponed  
10 Written exams have been cancelled  
11 N/A

12 15c. How have your practical examinations been affected?  
13  
14

- 15 ✓  
16 Practical exams will take place with modifications (e.g. virtual patients)  
17 Practical exams have been postponed  
18 Practical exams have been cancelled  
19 N/A  
20  
21  
22  
23  
24  
25  
26  
27  
28  
29  
30  
31  
32  
33  
34  
35  
36  
37  
38  
39  
40  
41  
42  
43  
44  
45  
46  
47  
48  
49  
50  
51  
52  
53  
54  
55  
56  
57  
58  
59  
60

STROBE Statement—Checklist of items that should be included in reports of *cohort studies*

|                              | Item No | Recommendation                                                                                                                                                                                                                                                                                                         | Page No    |
|------------------------------|---------|------------------------------------------------------------------------------------------------------------------------------------------------------------------------------------------------------------------------------------------------------------------------------------------------------------------------|------------|
| <b>Title and abstract</b>    | 1       | (a) Indicate the study's design with a commonly used term in the title or the abstract                                                                                                                                                                                                                                 | 1          |
|                              |         | (b) Provide in the abstract an informative and balanced summary of what was done and what was found                                                                                                                                                                                                                    | 2          |
| <b>Introduction</b>          |         |                                                                                                                                                                                                                                                                                                                        |            |
| Background/rationale         | 2       | Explain the scientific background and rationale for the investigation being reported                                                                                                                                                                                                                                   | 4          |
| Objectives                   | 3       | State specific objectives, including any prespecified hypotheses                                                                                                                                                                                                                                                       | 5          |
| <b>Methods</b>               |         |                                                                                                                                                                                                                                                                                                                        |            |
| Study design                 | 4       | Present key elements of study design early in the paper                                                                                                                                                                                                                                                                | 6          |
| Setting                      | 5       | Describe the setting, locations, and relevant dates, including periods of recruitment, exposure, follow-up, and data collection                                                                                                                                                                                        | 6          |
| Participants                 | 6       | (a) Give the eligibility criteria, and the sources and methods of selection of participants. Describe methods of follow-up<br>(b) For matched studies, give matching criteria and number of exposed and unexposed                                                                                                      | 6          |
| Variables                    | 7       | Clearly define all outcomes, exposures, predictors, potential confounders, and effect modifiers. Give diagnostic criteria, if applicable                                                                                                                                                                               | 6          |
| Data sources/<br>measurement | 8*      | For each variable of interest, give sources of data and details of methods of assessment (measurement). Describe comparability of assessment methods if there is more than one group                                                                                                                                   | 6          |
| Bias                         | 9       | Describe any efforts to address potential sources of bias                                                                                                                                                                                                                                                              | 6-8,<br>18 |
| Study size                   | 10      | Explain how the study size was arrived at                                                                                                                                                                                                                                                                              | 6          |
| Quantitative variables       | 11      | Explain how quantitative variables were handled in the analyses. If applicable, describe which groupings were chosen and why                                                                                                                                                                                           | 7          |
| Statistical methods          | 12      | (a) Describe all statistical methods, including those used to control for confounding<br>(b) Describe any methods used to examine subgroups and interactions<br>(c) Explain how missing data were addressed<br>(d) If applicable, explain how loss to follow-up was addressed<br>(e) Describe any sensitivity analyses | 7          |
| <b>Results</b>               |         |                                                                                                                                                                                                                                                                                                                        |            |
| Participants                 | 13*     | (a) Report numbers of individuals at each stage of study—eg numbers potentially eligible, examined for eligibility, confirmed eligible, included in the study, completing follow-up, and analysed<br>(b) Give reasons for non-participation at each stage<br>(c) Consider use of a flow diagram                        | 8-9        |
| Descriptive data             | 14*     | (a) Give characteristics of study participants (eg demographic, clinical, social) and information on exposures and potential confounders<br>(b) Indicate number of participants with missing data for each variable of interest<br>(c) Summarise follow-up time (eg, average and total amount)                         | 8-9        |
| Outcome data                 | 15*     | Report numbers of outcome events or summary measures over time                                                                                                                                                                                                                                                         | 8-12       |

|    |                          |    |                                                                                                                                                                                                              |       |
|----|--------------------------|----|--------------------------------------------------------------------------------------------------------------------------------------------------------------------------------------------------------------|-------|
| 1  | Main results             | 16 | (a) Give unadjusted estimates and, if applicable, confounder-adjusted estimates and their precision (eg, 95% confidence interval). Make clear which confounders were adjusted for and why they were included | 8-12  |
| 2  |                          |    | (b) Report category boundaries when continuous variables were categorized                                                                                                                                    |       |
| 3  |                          |    | (c) If relevant, consider translating estimates of relative risk into absolute risk for a meaningful time period                                                                                             |       |
| 4  |                          |    |                                                                                                                                                                                                              |       |
| 5  | Other analyses           | 17 | Report other analyses done—eg analyses of subgroups and interactions, and sensitivity analyses                                                                                                               | 8-12  |
| 6  | <b>Discussion</b>        |    |                                                                                                                                                                                                              |       |
| 7  | Key results              | 18 | Summarise key results with reference to study objectives                                                                                                                                                     | 13-18 |
| 8  | Limitations              | 19 | Discuss limitations of the study, taking into account sources of potential bias or imprecision. Discuss both direction and magnitude of any potential bias                                                   | 18-19 |
| 9  | Interpretation           | 20 | Give a cautious overall interpretation of results considering objectives, limitations, multiplicity of analyses, results from similar studies, and other relevant evidence                                   | 13-18 |
| 10 | Generalisability         | 21 | Discuss the generalisability (external validity) of the study results                                                                                                                                        | 13-18 |
| 11 | <b>Other information</b> |    |                                                                                                                                                                                                              |       |
| 12 | Funding                  | 22 | Give the source of funding and the role of the funders for the present study and, if applicable, for the original study on which the present article is based                                                | 22    |

\*Give information separately for exposed and unexposed groups.

**Note:** An Explanation and Elaboration article discusses each checklist item and gives methodological background and published examples of transparent reporting. The STROBE checklist is best used in conjunction with this article (freely available on the Web sites of PLoS Medicine at <http://www.plosmedicine.org/>, Annals of Internal Medicine at <http://www.annals.org/>, and Epidemiology at <http://www.epidem.com/>). Information on the STROBE Initiative is available at <http://www.strobe-statement.org>.
