# Supplementary material for: Perceptions of medical students towards online teaching during the COVID-19 pandemic: a national cross-sectional survey of 2721 UK medical students
Source: PubMed Central journal article supplement — BMJ Open. 2020 Nov 5;10(11):e042378. doi: 10.1136/bmjopen-2020-042378 (PMC7646323; doi:10.1136/bmjopen-2020-042378), 2020-11-05
Supplement: bmjopen-2020-042378supp001.pdf [file bmjopen-2020-042378supp001.pdf]

## Appendix

### **Appendix I – Online Questionnaire**

#### **Covid-19, Online Learning & Medical Education**

Thank you for your interest in completing our short survey investigating the role of online learning in facilitating medical education during the Covid-19 pandemic in the UK. The data collected is **non-identifiable** and will be used for research purposes.

This survey will close on Monday 11th May at 10pm.

Please tick the box to proceed:

I consent to my information being used for research purposes and this is my first time completing this survey.

Survey Code:

#### **Background**

1. Which UK Medical School do you attend?

2. What year are you in?

3. What is your gender?

## Online Learning & Medical Education

4. Prior to the Covid-19 pandemic, which online learning platforms/resources did you engage with? (Please select all which apply)

Video tutorials e.g. Youtube/Osmosis

Live tutorials via Zoom/similar platforms by **Medical School**

Live tutorials via Zoom/similar platforms by **other sources**

Online question banks

Online/Digital Flashcards e.g. Brainscape, Anki

Pre-recorded tutorials via Medical School specific online learning platform

None

Other - please specify

5. Which method of online learning do you find the most effective? Please rank the following methods from 1-5 (1=most effective, 5=least effective)

Video tutorials e.g. Youtube/Osmosis

Live tutorials via Zoom/similar platforms

Online question banks

Online/Digital Flashcards e.g. Brainscape, Anki

Other - please specify:

6. Prior to the Covid-19 pandemic, how many hours per week did you spend on average on online learning?

7. During the current Covid-19 pandemic, how has your medical school adapted teaching for your year? (Please select all which apply)

Introduced a new online learning platform with new resources

Introduced new resources to an existing online learning platform

Delivered live tutorials via Zoom/similar platforms

Delivered pre-recorded tutorials

Other - please specify:

8. Are these online teaching sessions interactive?

Yes

No

Majority are

Majority are not

8b. What makes your teaching sessions interactive? (Please select all which apply)

Opportunity to interact via chat box

Opportunity to interact via speech

Live quiz

Other - please specify:

9. Does the online learning follow a pre-set curriculum, or is it based on student requests?

- Pre-set curriculum  
 Student requests  
 Combination of both

10. During the current Covid-19 pandemic, how many hours per week do you spend on average on online learning?

### Student Perceptions of Online Learning

11. Please rank the following statements on your experience of online learning from 1-5 (1=Strongly disagree, 5 = Strongly agree)

0                      1                      2                      3                      4                      5

The teaching is often stimulating

\_\_\_\_\_

I find it easy to engage in the lesson

\_\_\_\_\_

I feel able to ask the questions I want

\_\_\_\_\_

I enjoy the online teaching

\_\_\_\_\_

I would like the online teaching to be more interactive

I feel that online teaching is as effective as face-face teaching

I prefer online teaching to face-face teaching

The teachers are well prepared for the teaching sessions

I feel I am being well prepared for my profession

My internet connection can be problematic

12. What aspects of online learning do you enjoy? (Please select all which apply)

 No travel Ability to ask questions Cost savings More comfortable Interactive Ability to learn at own pace

Flexibility Other - please specify:

13. What do you feel are the barriers to online learning? (Please select all which apply)

 Internet connection Lack of space Timing of tutorials Lack of devices Family distractions Anxiety Other - please specify:

### Role of Online Learning in Clinical Teaching

14a. Do you feel online learning has successfully replaced the clinical teaching you receive from direct patient contact?

Yes  
 No  
 Yes, to some extent  
 N/A

14b. Do you feel able to learn practical clinical skills through online learning?

Yes  
 No  
 Yes, to some extent  
 N/A

15. Have your examinations been affected by Covid-19?

 Yes No N/A

15b. How have your written examinations been affected?

- Written exams will take place remotely online
- Written exams have been postponed
- Written exams have been cancelled
- N/A

15c. How have your practical examinations been affected?

- Practical exams will take place with modifications (e.g. virtual patients)
- Practical exams have been postponed
- Practical exams have been cancelled
- N/A
